## Supplementary information

### Supplementary Figures

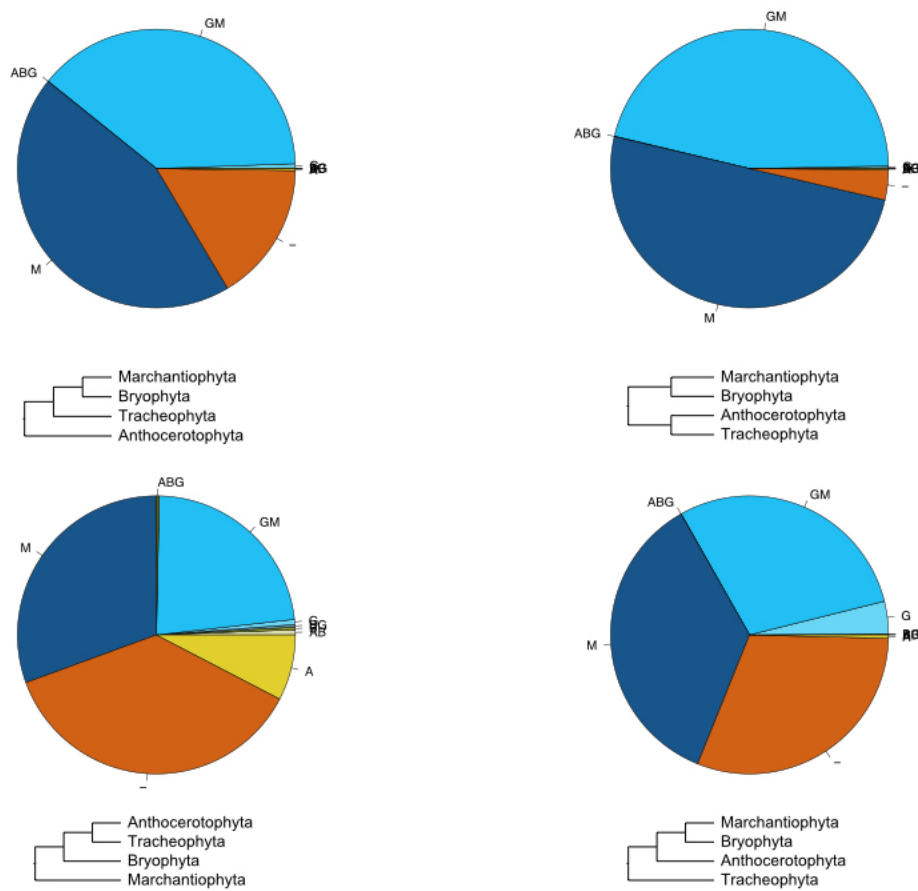

**Figure S1 | Ancestral state reconstruction of the mycorrhizal association for the last common ancestor of Embryophyta, given the different phylogenetic constraints.** Pie charts show the likelihood of the ancestral states for the MRCA of Embryophyta for each phylogenetic hypothesis shown below. Letters represent mycorrhizal associations: (A) Ascomycota; (B) Basidiomycota; (G) Glomeromycotina; (M) Mucoromycotina; (-) Non-mycorrhizal. Combinations of letters represent a combination of mycorrhizal associations.

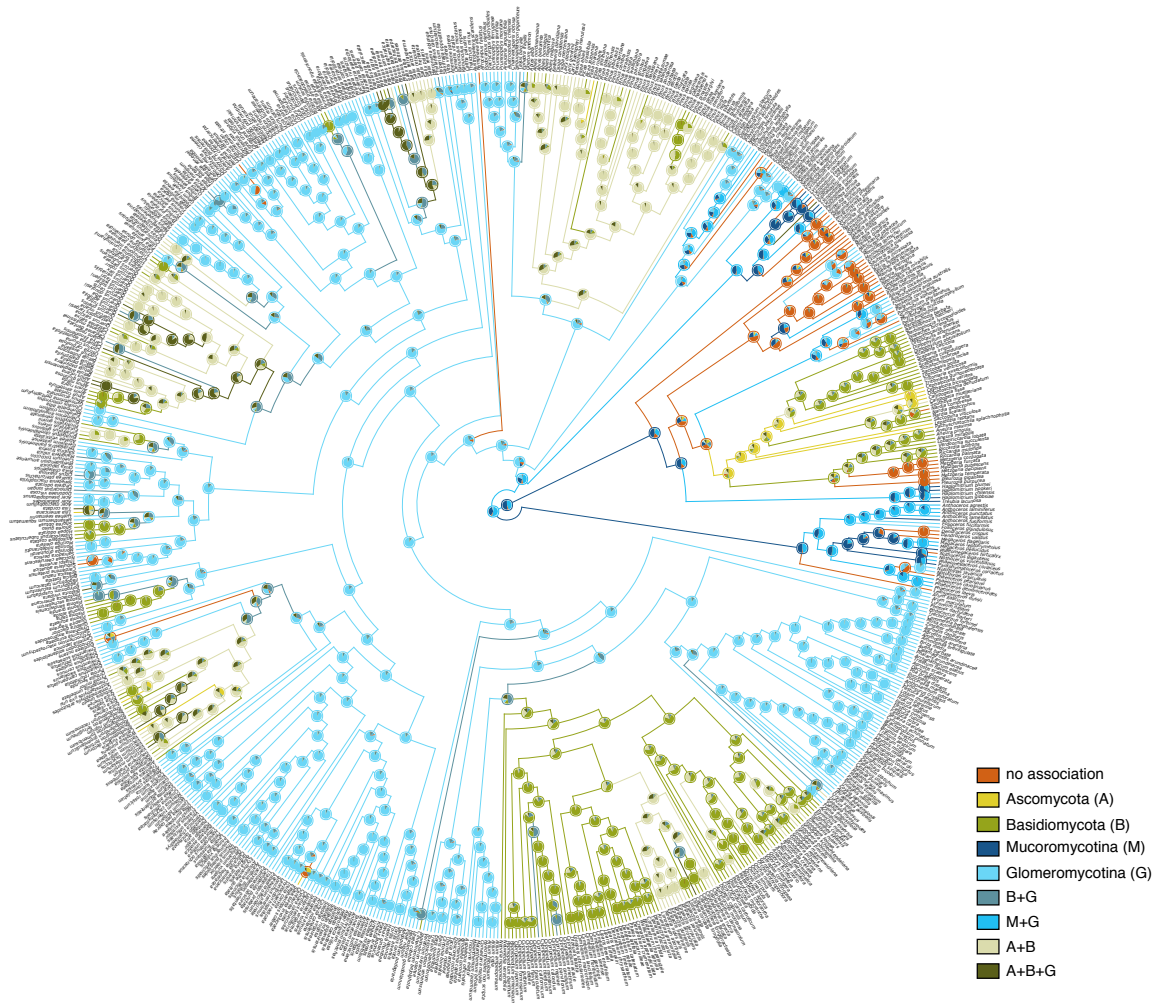

**Figure S2 | Ancestral state reconstruction of mycorrhizal associations in land plants.** Cladogram showing the ancestral state reconstructions of mycorrhizal associations in land plants ( $n = 732$  species) using a phylogenetic hypothesis in which a clade consisting of liverworts and bryophytes are the sister group of all other land plant species. Branches are coloured according to the most probable state of their ancestral nodes. Pie charts show the likelihood of the ancestral states for each node.

## Supplementary Tables

**Table S1 | An enumeration of the most likely scenarios by which the initial association between mycorrhiza and land plants came about, with their relative support by the data quantified.**

Letters represent mycorrhizal associations: (A) Ascomycota; (B) Basidiomycota; (G)

Glomeromycotina; (M) Mucoromycotina; (-) Non-mycorrhizal.

| <b>Rooting</b> | <b>Constrained root state</b> | <b>lnL-run1</b> | <b>lnL-run2</b> | <b>lnL-run3</b> | <b>MeanLnL</b> | <b>Log Bayes Factor</b> |
|----------------|-------------------------------|-----------------|-----------------|-----------------|----------------|-------------------------|
| <b>ATxMB</b>   | <b>M</b>                      | -679.911621     | -676.876677     | -671.750591     | -676.1796297   | <b>30.970172</b>        |
| <b>ATxMB</b>   | <b>A</b>                      | -667.689857     | -662.379807     | -660.662247     | -663.5773037   | 5.76552                 |
| <b>ATxMB</b>   | <b>B</b>                      | -659.387552     | -654.114889     | -655.512716     | -656.3383857   | -8.712316               |
| <b>ATxMB</b>   | <b>G</b>                      | -658.944728     | -664.071205     | -658.896524     | -660.6374857   | -0.114116               |
| <b>ATxMB</b>   | <b>none</b>                   | -657.828967     | -663.990698     | -660.263966     | -660.6945437   |                         |
| <b>ABasal</b>  | <b>M</b>                      | -659.531851     | -660.907574     | -661.371545     | -660.6036567   | <b>8.352606</b>         |
| <b>ABasal</b>  | <b>A</b>                      | -658.200433     | -655.505655     | -659.652527     | -657.786205    | 2.717702667             |
| <b>ABasal</b>  | <b>B</b>                      | -652.784653     | -655.987546     | -652.970134     | -653.914111    | -5.026485333            |
| <b>ABasal</b>  | <b>G</b>                      | -660.683007     | -657.611251     | -655.600053     | -657.9647703   | 3.074833333             |
| <b>ABasal</b>  | <b>none</b>                   | -656.260611     | -656.820943     | -656.200507     | -656.4273537   |                         |
| <b>MBasal</b>  | <b>M</b>                      | -638.636828     | -638.362954     | -639.758555     | -638.9194457   | <b>13.25466133</b>      |
| <b>MBasal</b>  | <b>A</b>                      | -630.678902     | -632.050728     | -631.148102     | -631.2925773   | -1.999075333            |
| <b>MBasal</b>  | <b>B</b>                      | -629.176058     | -631.08574      | -630.670126     | -630.3106413   | -3.962947333            |
| <b>MBasal</b>  | <b>G</b>                      | -633.478991     | -633.849004     | -634.833786     | -634.053927    | 3.523624                |
| <b>MBasal</b>  | <b>none</b>                   | -632.515668     | -631.542916     | -632.817761     | -632.292115    |                         |
| <b>TBasal</b>  | <b>M</b>                      | -677.357096     | -665.456265     | -667.230832     | -670.014731    | <b>13.26064867</b>      |
| <b>TBasal</b>  | <b>A</b>                      | -658.521647     | -676.24561      | -667.693472     | -667.4869097   | 8.205006                |
| <b>TBasal</b>  | <b>B</b>                      | -663.959132     | -656.572985     | -660.663275     | -660.398464    | -5.971885333            |
| <b>TBasal</b>  | <b>G</b>                      | -660.874689     | -665.269231     | -658.571373     | -661.5717643   | -3.625284667            |
| <b>TBasal</b>  | <b>none</b>                   | -665.074366     | -670.923572     | -654.155282     | -663.3844067   |                         |

**Table S2 | Mycorrhizal interactions database**

| order                   | genus              | species        | Synonym/subspecies/alternative spelling                                   | Ascomycota | Basidiomycota | Glomeromycota | Mucoromycotina | References                                                                                    |
|-------------------------|--------------------|----------------|---------------------------------------------------------------------------|------------|---------------|---------------|----------------|-----------------------------------------------------------------------------------------------|
| <b>Anthocerotophyta</b> |                    |                |                                                                           |            |               |               |                |                                                                                               |
| Anthocerotales          | Anthoceros         | agrestis       |                                                                           | 0          | 0             | 1             | 1              | (Desirò et al. 2013)                                                                          |
| Anthocerotales          | Anthoceros         | fusififormis   |                                                                           | 0          | 0             | 0             | 1              | (Desirò et al. 2013)                                                                          |
| Anthocerotales          | Anthoceros         | lamellatus     |                                                                           | 0          | 0             | 1             | 1              | (Desirò et al. 2013)                                                                          |
| Anthocerotales          | Anthoceros         | laminiferus    |                                                                           | 0          | 0             | 1             | 1              | (Bidartondo et al. 2011; Desirò et al. 2013)                                                  |
| Anthocerotales          | Anthoceros         | punctatus      |                                                                           | 0          | 0             | 1             | 1              | (Desirò et al. 2013)                                                                          |
| Anthocerotales          | Folioceros         | fuciformis     |                                                                           | 0          | 0             | 1             | 0              | (Desirò et al. 2013)                                                                          |
| Anthocerotales          | Folioceros         | glandulosus    | Folioceros cf. glandulosus                                                | 0          | 0             | 1             | 0              | (Desirò et al. 2013)                                                                          |
| Dendrocerotales         | Dendroceros        | crispus        |                                                                           | 0          | 0             | 0             | 0              | (Desirò et al. 2013)                                                                          |
| Dendrocerotales         | Dendroceros        | validus        |                                                                           | 0          | 0             | 0             | 0              | (Desirò et al. 2013)                                                                          |
| Dendrocerotales         | Megaceros          | flagellaris    |                                                                           | 0          | 0             | 0             | 0              | (Desirò et al. 2013)                                                                          |
| Dendrocerotales         | Megaceros          | leptohymenius  |                                                                           | 0          | 0             | 1             | 1              | (Desirò et al. 2013)                                                                          |
| Dendrocerotales         | Megaceros          | pellucidus     |                                                                           | 0          | 0             | 1             | 1              | (Desirò et al. 2013)                                                                          |
| Dendrocerotales         | Nothoceros         | giganteus      |                                                                           | 0          | 0             | 0             | 0              | (Desirò et al. 2013)                                                                          |
| Dendrocerotales         | Nothoceros         | vincentianus   |                                                                           | 0          | 0             | 1             | 1              | (Desirò et al. 2013)                                                                          |
| Dendrocerotales         | Phaeomegaceros     | coriaceus      | Phaeomegaceros coriaceus (Duff et al. 2007; Crandall-Stotler et al. 2008) | 0          | 0             | 1             | 1              | (Desirò et al. 2013)                                                                          |
| Dendrocerotales         | Phaeomegaceros     | hirticalyx     |                                                                           | 0          | 0             | 0             | 1              | (Desirò et al. 2013)                                                                          |
| Leiosporocerotales      | Leiosporoceros     | dussii         |                                                                           | 0          | 0             | 0             | 0              | (Desirò et al. 2013)                                                                          |
| Notothyldales           | Notothylias        | javanica       |                                                                           | 0          | 0             | 1             | 0              | (Desirò et al. 2013)                                                                          |
| Notothyldales           | Notothylias        | orbicularis    |                                                                           | 0          | 0             | 1             | 0              | (Desirò et al. 2013)                                                                          |
| Notothyldales           | Paraphymatoceros   | coriaceus      |                                                                           | 0          | 0             | 0             | 1              | (Bidartondo et al. 2011)                                                                      |
| Notothyldales           | Phaeoceros         | carolinianus   |                                                                           | 0          | 0             | 1             | 1              | (Bidartondo et al. 2011; Desirò et al. 2013)                                                  |
| Notothyldales           | Phaeoceros         | dendroceroides |                                                                           | 0          | 0             | 1             | 1              | (Desirò et al. 2013)                                                                          |
| Notothyldales           | Phaeoceros         | laevis         |                                                                           | 0          | 0             | 1             | 1              | (Bidartondo et al. 2011; Desirò et al. 2013)                                                  |
| Notothyldales           | Phaeoceros         | pearsonii      |                                                                           | 0          | 0             | 0             | 0              | (Desirò et al. 2013)                                                                          |
| <b>Bryophyta</b>        |                    |                |                                                                           |            |               |               |                |                                                                                               |
| Funariales              | Physcomitrella     | patens         |                                                                           | 0          | 0             | 0             | 0              | (Pressel et al. 2010)                                                                         |
| Hypnales                | Sanionia           | uncinata       |                                                                           | 0          | 0             | 0             | 0              | (Pressel et al. 2010)                                                                         |
| Orthotrichales          | Nyholmiella        | obtusifolia    |                                                                           | 0          | 0             | 0             | 0              | (Pressel et al. 2010)                                                                         |
| Pottiales               | Syntrichia         | ruralis        |                                                                           | 0          | 0             | 0             | 0              | (Pressel et al. 2010)                                                                         |
| Sphagnales              | Sphagnum           | palustre       |                                                                           | 0          | 0             | 0             | 0              | (Pressel et al. 2010)                                                                         |
| Takakiales              | Takakia            | lepidozoides   |                                                                           | 0          | 0             | 0             | 0              | (Pressel et al. 2010)                                                                         |
| Tetraphidales           | Tetraphis          | pellucida      |                                                                           | 0          | 0             | 0             | 0              | (Pressel et al. 2010)                                                                         |
| <b>Marchantiophyta</b>  |                    |                |                                                                           |            |               |               |                |                                                                                               |
| Blasiales               | Blasia             | pusilla        |                                                                           | 0          | 0             | 0             | 0              | (Ligrone et al. 2007)                                                                         |
| Calobryales             | Haplomitrium       | blumei         |                                                                           | 0          | 0             | 0             | 1              | (Bidartondo et al. 2011)                                                                      |
| Calobryales             | Haplomitrium       | chilensis      | Haplomitrium chilensis                                                    | 0          | 0             | 1             | 0              | (Ligrone et al. 2007; Opik et al. 2010)                                                       |
| Calobryales             | Haplomitrium       | gibbsiae       |                                                                           | 0          | 0             | 0             | 1              | (Bidartondo et al. 2011)                                                                      |
| Calobryales             | Haplomitrium       | hookeri        |                                                                           | 0          | 0             | 0             | 1              | (Bidartondo et al. 2011)                                                                      |
| Fossombroniales         | Allisonia          | cockaynii      |                                                                           | 0          | 0             | 1             | 1              | (Bidartondo et al. 2011)                                                                      |
| Fossombroniales         | Austrofossombronia | australis      |                                                                           | 0          | 0             | 1             | 0              | (Opik et al. 2010; Bidartondo et al. 2011)                                                    |
| Fossombroniales         | Fossombronia       | angulosa       |                                                                           | 0          | 0             | 1             | 0              | (Opik et al. 2010)                                                                            |
| Jungermanniales         | Barbilophozia      | barbata        |                                                                           | 0          | 1             | 0             | 0              | (Bidartondo and Duckett 2010)                                                                 |
| Jungermanniales         | Barbilophozia      | hatcheri       |                                                                           | 0          | 1             | 0             | 0              | (Bidartondo and Duckett 2010)                                                                 |
| Jungermanniales         | Barbilophozia      | lycopodioides  |                                                                           | 0          | 1             | 0             | 0              | (Bidartondo and Duckett 2010)                                                                 |
| Jungermanniales         | Calypogeia         | fissa          |                                                                           | 1          | 0             | 0             | 0              | (Duckett and Read 1991; Pressel et al. 2008a; Bidartondo and Duckett 2010)                    |
| Jungermanniales         | Calypogeia         | muelleriana    |                                                                           | 1          | 1             | 0             | 0              | (Duckett and Read 1991; Kottke et al. 2003; Bidartondo and Duckett 2010; Pressel et al. 2010) |
| Jungermanniales         | Cephalozia         | bicuspidata    |                                                                           | 1          | 0             | 0             | 0              | (Duckett and Read 1991; Pressel et al. 2008a)                                                 |
| Jungermanniales         | Cephaloziella      | varians        |                                                                           | 1          | 0             | 0             | 0              | (Upson et al. 2007)                                                                           |
| Jungermanniales         | Diplophyllum       | albicans       |                                                                           | 0          | 1             | 0             | 0              | (Bidartondo and Duckett 2010)                                                                 |

| order           | genus             | species        | Synonym/subspecies/alternative spelling             | Ascomycota | Basidiomycota | Glomeromycota | Mucoromycotina | References                                                                                   |
|-----------------|-------------------|----------------|-----------------------------------------------------|------------|---------------|---------------|----------------|----------------------------------------------------------------------------------------------|
| Jungermanniales | Diplophyllum      | obtusifolium   |                                                     | 0          | 1             | 0             | 0              | (Bidartondo and Duckett 2010)                                                                |
| Jungermanniales | Isopaches         | bicrenatus     | Lophozia bicrenata (Steere 1942)                    | 0          | 1             | 0             | 0              | (Bidartondo and Duckett 2010)                                                                |
| Jungermanniales | Lepidozia         | reptans        |                                                     | 1          | 0             | 0             | 0              | (Duckett and Read 1991; Pressel et al. 2008a; Bidartondo and Duckett 2010)                   |
| Jungermanniales | Lophozia          | ventricosa     |                                                     | 0          | 1             | 0             | 0              | (Duckett and Read 1991; Pressel et al. 2008a; Bidartondo and Duckett 2010)                   |
| Jungermanniales | Nardia            | compressa      |                                                     | 0          | 0             | 0             | 0              | (Duckett et al. 2006)                                                                        |
| Jungermanniales | Nardia            | geoscyphus     |                                                     | 0          | 1             | 0             | 0              | (Bidartondo and Duckett 2010)                                                                |
| Jungermanniales | Nardia            | scalaris       |                                                     | 0          | 1             | 0             | 0              | (Duckett and Read 1991; Pressel et al. 2008a; Bidartondo and Duckett 2010)                   |
| Jungermanniales | Neoorthocaulis    | floerkei       | Barbilophozia floerckii (Bakalin et al. 2016)       | 0          | 1             | 0             | 0              | (Bidartondo and Duckett 2010)                                                                |
| Jungermanniales | Odontoschisma     | denudatum      |                                                     | 1          | 0             | 0             | 0              | (Duckett and Read 1991; Pressel et al. 2008a)                                                |
| Jungermanniales | Orthocaulis       | attenuatus     | Barbilophozia attenuata (Söderström et al. 2010)    | 0          | 1             | 0             | 0              | (Duckett et al. 2006; Bidartondo and Duckett 2010)                                           |
| Jungermanniales | Pachyschistochila | splachnophylla |                                                     | 1          | 0             | 0             | 0              | (Pressel et al. 2008a; Pressel et al. 2008b)                                                 |
| Jungermanniales | Saccobasis        | polita         | Tritomaria polita (Kürschner 2010)                  | 0          | 1             | 0             | 0              | (Bidartondo and Duckett 2010)                                                                |
| Jungermanniales | Saccogyna         | viticulosa     |                                                     | 0          | 1             | 0             | 0              | (Duckett and Read 1991; Bidartondo and Duckett 2010)                                         |
| Jungermanniales | Scapania          | callicola      |                                                     | 0          | 1             | 0             | 0              | (Bidartondo and Duckett 2010)                                                                |
| Jungermanniales | Scapania          | cuspiduligera  |                                                     | 0          | 1             | 0             | 0              | (Bidartondo and Duckett 2010)                                                                |
| Jungermanniales | Scapania          | irrigua        |                                                     | 0          | 1             | 0             | 0              | (Bidartondo and Duckett 2010)                                                                |
| Jungermanniales | Scapania          | umbrosa        |                                                     | 0          | 1             | 0             | 0              | (Bidartondo and Duckett 2010)                                                                |
| Jungermanniales | Schistochilopsis  | incisa         | Lophozia incisa (Bakalin 2011)                      | 0          | 1             | 0             | 0              | (Kottke et al. 2003)                                                                         |
| Jungermanniales | Southbya          | nigrella       |                                                     | 0          | 1             | 0             | 0              | (Bidartondo and Duckett 2010)                                                                |
| Jungermanniales | Tritomaria        | exsectiformis  |                                                     | 0          | 1             | 0             | 0              | (Bidartondo and Duckett 2010)                                                                |
| Jungermanniales | Tritomaria        | quinquedentata |                                                     | 0          | 1             | 0             | 0              | (Duckett and Read 1991; Bidartondo and Duckett 2010)                                         |
| Marchantiales   | Bucegia           | romantica      |                                                     | 0          | 0             | 0             | 0              | (Ligrone et al. 2007)                                                                        |
| Marchantiales   | Conocephalum      | conicum        |                                                     | 0          | 0             | 1             | 0              | (Ligrone et al. 2007; Opik et al. 2010)                                                      |
| Marchantiales   | Exormotheca       | pustulosa      |                                                     | 0          | 0             | 0             | 0              | (Ligrone et al. 2007)                                                                        |
| Marchantiales   | Mannia            | androgyna      | Mannia angrogyna                                    | 0          | 0             | 0             | 0              | (Ligrone et al. 2007)                                                                        |
| Marchantiales   | Mannia            | fragrans       |                                                     | 0          | 0             | 0             | 0              | (Ligrone et al. 2007)                                                                        |
| Marchantiales   | Marchantia        | paleacea       |                                                     | 0          | 0             | 1             | 0              | (Ligrone et al. 2007; Pressel et al. 2010)                                                   |
| Marchantiales   | Monoclea          | gottschei      |                                                     | 0          | 0             | 1             | 0              | (Ligrone et al. 2007; Opik et al. 2010)                                                      |
| Marchantiales   | Monosolenium      | tenerum        |                                                     | 0          | 0             | 0             | 0              | (Ligrone et al. 2007)                                                                        |
| Marchantiales   | Oxymitra          | incrassata     |                                                     | 0          | 0             | 0             | 0              | (Ligrone et al. 2007)                                                                        |
| Marchantiales   | Preissia          | quadrata       |                                                     | 0          | 0             | 1             | 0              | (Opik et al. 2010)                                                                           |
| Marchantiales   | Riccia            | huebeneriana   | Ricciella huebeneriana (Evans 1913)                 | 0          | 0             | 0             | 0              | (Ligrone et al. 2007)                                                                        |
| Marchantiales   | Sauteria          | alpina         |                                                     | 0          | 0             | 0             | 0              | (Ligrone et al. 2007)                                                                        |
| Marchantiales   | Wiesnerella       | denudata       |                                                     | 0          | 0             | 0             | 0              | (Ligrone et al. 2007)                                                                        |
| Metzgeriales    | Aneura            | maxima         |                                                     | 0          | 1             | 0             | 0              | (Bidartondo and Duckett 2010)                                                                |
| Metzgeriales    | Aneura            | mirabilis      | Cryptothallus mirabilis (Wickett and Goffinet 2008) | 0          | 1             | 0             | 0              | (Duckett and Read 1991; Bidartondo and Duckett 2010)                                         |
| Metzgeriales    | Aneura            | pinguis        |                                                     | 0          | 1             | 0             | 0              | (Duckett and Read 1991; Kottke et al. 2003; Bidartondo and Duckett 2010; Krause et al. 2011) |
| Metzgeriales    | Lobatiriccardia   | lobata         | Aneura lobata (Preußing et al. 2010)                | 0          | 1             | 0             | 0              | (Ligrone et al. 2007)                                                                        |
| Metzgeriales    | Metzgeria         | conjugata      |                                                     | 0          | 0             | 0             | 0              | (Ligrone et al. 2007)                                                                        |
| Metzgeriales    | Metzgeria         | decipiens      |                                                     | 0          | 0             | 0             | 0              | (Ligrone et al. 2007)                                                                        |
| Metzgeriales    | Metzgeria         | furcata        |                                                     | 0          | 0             | 0             | 0              | (Ligrone et al. 2007)                                                                        |
| Metzgeriales    | Metzgeria         | pubescens      | Apometzgeria pubescens (Fuselier et al. 2011)       | 0          | 0             | 0             | 0              | (Ligrone et al. 2007)                                                                        |
| Metzgeriales    | Metzgeria         | temperata      |                                                     | 0          | 0             | 0             | 0              | (Ligrone et al. 2007)                                                                        |
| Metzgeriales    | Riccardia         | latifrons      |                                                     | 0          | 1             | 0             | 0              | (Krause et al. 2011)                                                                         |
| Metzgeriales    | Riccardia         | multifida      |                                                     | 0          | 1             | 0             | 0              | (Krause et al. 2011)                                                                         |
| Metzgeriales    | Riccardia         | palmata        |                                                     | 0          | 1             | 0             | 0              | (Krause et al. 2011)                                                                         |
| Metzgeriales    | Verdoornia        | succulenta     |                                                     | 0          | 1             | 0             | 0              | (Brundrett 2009; Pressel et al. 2010)                                                        |
| Neohodgsoniales | Neohodgsonia      | mirabilis      |                                                     | 0          | 0             | 1             | 1              | (Bidartondo et al. 2011)                                                                     |
| Pallaviciniales | Jensenia          | connivens      |                                                     | 0          | 0             | 1             | 0              | (Opik et al. 2010; Bidartondo et al. 2011)                                                   |
| Pallaviciniales | Pallavicinia      | xiphoides      |                                                     | 0          | 0             | 0             | 0              | (Ligrone et al. 2007)                                                                        |

| order                           | genus         | species        | Synonym/subspecies/alternative spelling | Ascomycota | Basidiomycota | Glomeromycota | Mucoromycotina | References                                                                                  |
|---------------------------------|---------------|----------------|-----------------------------------------|------------|---------------|---------------|----------------|---------------------------------------------------------------------------------------------|
| Pallaviciniales                 | Phyllohallia  | nivicola       |                                         | 0          | 0             | 0             | 0              | (Ligrone et al. 2007)                                                                       |
| Pallaviciniales                 | Podomitrium   | phyllanthus    |                                         | 0          | 0             | 1             | 0              | (Opik et al. 2010; Bidartondo et al. 2011)                                                  |
| Pallaviciniales                 | Symphyogyna   | hymenophyllum  | Symphyogyna hymenophyton                | 0          | 0             | 1             | 0              | (Opik et al. 2010; Bidartondo et al. 2011)                                                  |
| Pelliales                       | Pellia        | endiviifolia   |                                         | 0          | 0             | 1             | 0              | (Ligrone et al. 2007; Opik et al. 2010)                                                     |
| Pleuroziales                    | Pleurozia     | gigantea       |                                         | 0          | 0             | 0             | 0              | (Ligrone et al. 2007)                                                                       |
| Pleuroziales                    | Pleurozia     | purpurea       |                                         | 0          | 0             | 0             | 0              | (Ligrone et al. 2007)                                                                       |
| Sphaerocarpaceae                | Geothallus    | tuberosus      | Geothallus tuberosa                     | 0          | 0             | 0             | 0              | (Ligrone et al. 2007)                                                                       |
| Sphaerocarpaceae                | Riella        | helicophylla   |                                         | 0          | 0             | 0             | 0              | (Ligrone et al. 2007)                                                                       |
| Sphaerocarpaceae                | Sphaerocarpos | texanus        |                                         | 0          | 0             | 0             | 0              | (Ligrone et al. 2007)                                                                       |
| Treubiales                      | Treubia       | lacunosa       |                                         | 0          | 0             | 0             | 1              | (Bidartondo et al. 2011)                                                                    |
| <b>Tracheophyta, Angiosperm</b> |               |                |                                         |            |               |               |                |                                                                                             |
| Alismatales                     | Arum          | italicum       |                                         | 0          | 0             | 1             | 0              | (Opik et al. 2010)                                                                          |
| Alismatales                     | Arum          | maculatum      |                                         | 0          | 0             | 1             | 0              | (Opik et al. 2010)                                                                          |
| Alismatales                     | Luronium      | natans         |                                         | 0          | 0             | 1             | 0              | (Opik et al. 2010)                                                                          |
| Apiales                         | Aegopodium    | podagraria     |                                         | 0          | 0             | 1             | 0              | (Opik et al. 2010)                                                                          |
| Apiales                         | Daucus        | carota         |                                         | 0          | 0             | 1             | 0              | (Campagnac et al. 2008)                                                                     |
| Apiales                         | Hedera        | rhombea        |                                         | 0          | 0             | 1             | 0              | (Ahulu et al. 2007)                                                                         |
| Apiales                         | Panax         | ginseng        |                                         | 0          | 0             | 1             | 0              | (Kil et al. 2014)                                                                           |
| Apiales                         | Panax         | japonicus      |                                         | 0          | 0             | 1             | 0              | (Opik et al. 2010)                                                                          |
| Apiales                         | Torilis       | arvensis       |                                         | 0          | 0             | 1             | 0              | (Opik et al. 2010)                                                                          |
| Apiales                         | Torilis       | japonica       |                                         | 0          | 0             | 1             | 0              | (Opik et al. 2010)                                                                          |
| Arecales                        | Phoenix       | dactylifera    |                                         | 0          | 0             | 1             | 0              | (Opik et al. 2010)                                                                          |
| Arecales                        | Podococcus    | barteri        |                                         | 0          | 0             | 1             | 0              | (Opik et al. 2010)                                                                          |
| Arecales                        | Trachycarpus  | fortunei       |                                         | 0          | 0             | 1             | 0              | (Opik et al. 2010)                                                                          |
| Asparagales                     | Acianthus     | exsertus       |                                         | 0          | 1             | 0             | 0              | (Suárez et al. 2006)                                                                        |
| Asparagales                     | Allium        | ampeloprasum   |                                         | 0          | 0             | 1             | 0              | (Perner et al. 2006)                                                                        |
| Asparagales                     | Allium        | cepa           |                                         | 0          | 0             | 1             | 0              | (Opik et al. 2010)                                                                          |
| Asparagales                     | Allium        | fistulosum     |                                         | 0          | 0             | 1             | 0              | (Lee et al. 2008)                                                                           |
| Asparagales                     | Anacamptis    | laxiflora      |                                         | 0          | 1             | 0             | 0              | (Girlanda et al. 2011)                                                                      |
| Asparagales                     | Anacamptis    | morio          |                                         | 1          | 1             | 0             | 0              | (Ercole et al. 2015)                                                                        |
| Asparagales                     | Aphyllorchis  | montana        |                                         | 1          | 1             | 0             | 0              | (Roy et al. 2009)                                                                           |
| Asparagales                     | Arundina      | graminifolia   |                                         | 0          | 1             | 0             | 0              | (Ma et al. 2003)                                                                            |
| Asparagales                     | Asparagus     | officinalis    |                                         | 0          | 0             | 1             | 0              | (Yergeau et al. 2006; Palenzuela et al. 2010)                                               |
| Asparagales                     | Brodiaea      | coronaria      |                                         | 0          | 0             | 1             | 0              | (Phillips 2012)                                                                             |
| Asparagales                     | Cephalanthera | damasonium     |                                         | 1          | 1             | 0             | 0              | (Bidartondo et al. 2004; Julou et al. 2005; Bidartondo and Read 2008; Sakamoto et al. 2015) |
| Asparagales                     | Cephalanthera | erecta         |                                         | 0          | 1             | 0             | 0              | (Sakamoto et al. 2015)                                                                      |
| Asparagales                     | Cephalanthera | falcata        |                                         | 0          | 1             | 0             | 0              | (Sakamoto et al. 2015)                                                                      |
| Asparagales                     | Cephalanthera | longibracteata |                                         | 0          | 1             | 0             | 0              | (Sakamoto et al. 2015)                                                                      |
| Asparagales                     | Cephalanthera | longifolia     |                                         | 1          | 1             | 1             | 0              | (Abadie et al. 2006; Bidartondo and Read 2008; Sakamoto et al. 2015)                        |
| Asparagales                     | Cephalanthera | rubra          |                                         | 1          | 1             | 0             | 0              | (Bidartondo et al. 2004; Sakamoto et al. 2015)                                              |
| Asparagales                     | Convallaria   | majalis        |                                         | 0          | 0             | 1             | 0              | (Saks et al. 2014)                                                                          |
| Asparagales                     | Corallorhiza  | trifida        |                                         | 0          | 1             | 0             | 0              | (Zimmer et al. 2008)                                                                        |
| Asparagales                     | Corycium      | carnosum       |                                         | 0          | 1             | 0             | 0              | (Waterman et al. 2011)                                                                      |
| Asparagales                     | Cremastra     | appendiculata  |                                         | 0          | 1             | 0             | 0              | (Yagame et al. 2013)                                                                        |
| Asparagales                     | Cymbidium     | ensifolium     |                                         | 0          | 1             | 0             | 0              | (Jiang et al. 2012a; Jiang et al. 2015)                                                     |
| Asparagales                     | Cymbidium     | floribundum    |                                         | 0          | 1             | 0             | 0              | (Yang et al. 2007)                                                                          |
| Asparagales                     | Cymbidium     | goeringii      |                                         | 0          | 1             | 0             | 0              | (Wu et al. 2010; Ogura-Tsujita et al. 2012)                                                 |
| Asparagales                     | Cymbidium     | lancifolium    |                                         | 0          | 1             | 0             | 0              | (Ogura-Tsujita et al. 2012)                                                                 |
| Asparagales                     | Cymbidium     | macrorhizon    |                                         | 0          | 1             | 0             | 0              | (Ogura-Tsujita et al. 2012)                                                                 |

| order       | genus         | species           | Synonym/subspecies/alternative spelling     | Ascomycota | Basidiomycota | Glomeromycota | Microromycotina | References                                                                 |
|-------------|---------------|-------------------|---------------------------------------------|------------|---------------|---------------|-----------------|----------------------------------------------------------------------------|
| Asparagales | Cymbidium     | sinense           |                                             | 0          | 1             | 0             | 0               | (Wu et al. 2010)                                                           |
| Asparagales | Cypripedium   | acaule            |                                             | 0          | 1             | 0             | 0               | (Shefferson et al. 2007)                                                   |
| Asparagales | Cypripedium   | arietinum         |                                             | 0          | 1             | 0             | 0               | (Shefferson et al. 2007)                                                   |
| Asparagales | Cypripedium   | calceolus         |                                             | 0          | 1             | 0             | 0               | (Shefferson et al. 2005; Shefferson et al. 2007)                           |
| Asparagales | Cypripedium   | californicum      |                                             | 0          | 1             | 1             | 0               | (Shefferson et al. 2005; Shefferson et al. 2007)                           |
| Asparagales | Cypripedium   | candidum          |                                             | 0          | 1             | 0             | 0               | (Shefferson et al. 2005; Shefferson et al. 2007)                           |
| Asparagales | Cypripedium   | debile            |                                             | 0          | 1             | 0             | 0               | (Shefferson et al. 2007)                                                   |
| Asparagales | Cypripedium   | fasciculatum      |                                             | 0          | 1             | 0             | 0               | (Shefferson et al. 2005; Shefferson et al. 2007)                           |
| Asparagales | Cypripedium   | flavum            |                                             | 0          | 1             | 0             | 0               | (Yuan et al. 2010)                                                         |
| Asparagales | Cypripedium   | formosanum        |                                             | 0          | 1             | 0             | 0               | (Shefferson et al. 2007)                                                   |
| Asparagales | Cypripedium   | guttatum          |                                             | 0          | 1             | 0             | 0               | (Shefferson et al. 2005; Shefferson et al. 2007; Yuan et al. 2010)         |
| Asparagales | Cypripedium   | japonicum         |                                             | 0          | 1             | 0             | 0               | (Shefferson et al. 2007)                                                   |
| Asparagales | Cypripedium   | montanum          |                                             | 0          | 1             | 0             | 0               | (Shefferson et al. 2005; Shefferson et al. 2007)                           |
| Asparagales | Cypripedium   | parviflorum       |                                             | 0          | 1             | 1             | 0               | (Shefferson et al. 2005; Shefferson et al. 2007)                           |
| Asparagales | Cypripedium   | reginae           |                                             | 0          | 1             | 0             | 0               | (Shefferson et al. 2007)                                                   |
| Asparagales | Cypripedium   | tibeticum         |                                             | 0          | 1             | 0             | 0               | (Yuan et al. 2010)                                                         |
| Asparagales | Dendrobium    | catenatum         | Dendrobium officinale (Xiaohua et al. 2009) | 0          | 1             | 0             | 0               | (Xing et al. 2013; Tan et al. 2014)                                        |
| Asparagales | Dendrobium    | chrysanthum       |                                             | 0          | 1             | 0             | 0               | (Chen et al. 2012)                                                         |
| Asparagales | Dendrobium    | crumenatum        |                                             | 0          | 1             | 0             | 0               | (Ma et al. 2003)                                                           |
| Asparagales | Dendrobium    | fimbriatum        |                                             | 0          | 1             | 0             | 0               | (Xing et al. 2013)                                                         |
| Asparagales | Dendrobium    | nobile            |                                             | 0          | 1             | 0             | 0               | (Chen et al. 2012)                                                         |
| Asparagales | Disa          | bracteata         |                                             | 0          | 1             | 0             | 0               | (Bonnardeaux et al. 2007; Sommer et al. 2012)                              |
| Asparagales | Disperis      | capensis          |                                             | 0          | 1             | 0             | 0               | (Waterman et al. 2011)                                                     |
| Asparagales | Epidendrum    | rhopalosteale     |                                             | 0          | 1             | 0             | 0               | (Riofrio et al. 2013)                                                      |
| Asparagales | Epipactis     | albensis          |                                             | 1          | 1             | 0             | 0               | (Tešitelová et al. 2012)                                                   |
| Asparagales | Epipactis     | atrorubens        |                                             | 1          | 1             | 0             | 0               | (Bidartondo et al. 2004; Bidartondo and Read 2008; Tešitelová et al. 2012) |
| Asparagales | Epipactis     | dunensis          |                                             | 1          | 1             | 0             | 0               | (Bidartondo and Read 2008)                                                 |
| Asparagales | Epipactis     | helleborine       |                                             | 1          | 1             | 0             | 0               | (Bidartondo et al. 2004; Weiss et al. 2004; Tešitelová et al. 2012)        |
| Asparagales | Epipactis     | palustris         |                                             | 1          | 1             | 0             | 0               | (Bidartondo et al. 2004; Illyes et al. 2009)                               |
| Asparagales | Epipactis     | purpurata         |                                             | 1          | 1             | 0             | 0               | (Tešitelová et al. 2012)                                                   |
| Asparagales | Eriochilus    | cucullatus        |                                             | 0          | 1             | 0             | 0               | (Weiss et al. 2004)                                                        |
| Asparagales | Goodyera      | foliosa           |                                             | 1          | 1             | 0             | 0               | (Shefferson et al. 2010)                                                   |
| Asparagales | Goodyera      | maximowicziana    | foliosa var. maximowicziana                 | 0          | 1             | 0             | 0               | (Shefferson et al. 2010)                                                   |
| Asparagales | Goodyera      | oblongifolia      |                                             | 0          | 1             | 0             | 0               | (Shefferson et al. 2005)                                                   |
| Asparagales | Goodyera      | procera           |                                             | 1          | 1             | 0             | 0               | (Shefferson et al. 2010)                                                   |
| Asparagales | Goodyera      | pubescens         |                                             | 0          | 1             | 0             | 0               | (McCormick et al. 2004)                                                    |
| Asparagales | Goodyera      | repens            |                                             | 0          | 1             | 0             | 0               | (Shefferson et al. 2010)                                                   |
| Asparagales | Goodyera      | schlechtendaliana |                                             | 0          | 1             | 0             | 0               | (Shefferson et al. 2010)                                                   |
| Asparagales | Goodyera      | velutina          |                                             | 1          | 1             | 0             | 0               | (Shefferson et al. 2010)                                                   |
| Asparagales | Gymnadenia    | conopsea          |                                             | 1          | 1             | 0             | 0               | (Illyes et al. 2009; Stark et al. 2009; Tešitelová et al. 2013)            |
| Asparagales | Hexalectris   | revoluta          |                                             | 0          | 1             | 0             | 0               | (Weiss et al. 2004)                                                        |
| Asparagales | Hyacinthoides | non-scripta       |                                             | 0          | 0             | 1             | 0               | (Opik et al. 2010)                                                         |
| Asparagales | Ionopsis      | utricularioides   |                                             | 0          | 1             | 0             | 0               | (Otero et al. 2002)                                                        |
| Asparagales | Limodorum     | abortivum         |                                             | 1          | 1             | 0             | 0               | (Girlanda et al. 2006)                                                     |
| Asparagales | Liparis       | kumokiri          |                                             | 0          | 1             | 0             | 0               | (Shimura et al. 2009)                                                      |
| Asparagales | Liparis       | lilifolia         | Liparis lilifolia                           | 0          | 1             | 0             | 0               | (McCormick et al. 2004)                                                    |
| Asparagales | Liparis       | loeselii          |                                             | 0          | 1             | 0             | 0               | (Illyes et al. 2009)                                                       |
| Asparagales | Listera       | cordata           | Neottia cordata (Wiegand 1899)              | 0          | 1             | 0             | 0               | (Tešitelová et al. 2015)                                                   |
| Asparagales | Listera       | ovata             | Neottia ovate (Wiegand 1899)                | 0          | 1             | 0             | 0               | (Tešitelová et al. 2015)                                                   |
| Asparagales | Maianthemum   | bifolium          |                                             | 0          | 0             | 1             | 0               | (Opik et al. 2010)                                                         |

| order       | genus           | species       | Synonym/subspecies/alternative spelling | Ascomycota | Basidiomycota | Glomeromycota | Microromycotina | References                                                                               |
|-------------|-----------------|---------------|-----------------------------------------|------------|---------------|---------------|-----------------|------------------------------------------------------------------------------------------|
| Asparagales | Maianthemum     | racemosum     |                                         | 0          | 0             | 1             | 0               | (Opik et al. 2010)                                                                       |
| Asparagales | Neottia         | nidus-avis    |                                         | 1          | 1             | 0             | 0               | (Selosse et al. 2002; Bidartondo et al. 2004; Weiss et al. 2004; Těšitelová et al. 2015) |
| Asparagales | Nervilia        | nipponica     |                                         | 0          | 1             | 0             | 0               | (Nomura et al. 2013)                                                                     |
| Asparagales | Neuwiedia       | veratrifolia  |                                         | 0          | 1             | 0             | 0               | (Shefferson et al. 2007)                                                                 |
| Asparagales | Ophrys          | fuciflora     |                                         | 0          | 1             | 0             | 0               | (Girlanda et al. 2011)                                                                   |
| Asparagales | Ophrys          | insectifera   |                                         | 0          | 1             | 0             | 0               | (Gebauer et al. 2016)                                                                    |
| Asparagales | Orchis          | anthropophora |                                         | 0          | 1             | 0             | 0               | (Jacquemyn et al. 2010; Schatz et al. 2010)                                              |
| Asparagales | Orchis          | mascula       |                                         | 0          | 1             | 0             | 0               | (Jacquemyn et al. 2010)                                                                  |
| Asparagales | Orchis          | militaris     |                                         | 0          | 1             | 0             | 0               | (Jacquemyn et al. 2010)                                                                  |
| Asparagales | Orchis          | purpurea      |                                         | 0          | 1             | 0             | 0               | (Jacquemyn et al. 2010)                                                                  |
| Asparagales | Orchis          | simia         |                                         | 0          | 1             | 0             | 0               | (Schatz et al. 2010)                                                                     |
| Asparagales | Paphiopedilum   | armeniacum    |                                         | 0          | 1             | 0             | 0               | (Yuan et al. 2010)                                                                       |
| Asparagales | Paphiopedilum   | dianthum      |                                         | 0          | 1             | 0             | 0               | (Yuan et al. 2010)                                                                       |
| Asparagales | Phaius          | tancarvilleae | Phaius tankervilleae                    | 0          | 1             | 0             | 0               | (Shan et al. 2002; Shu Fen et al. 2012)                                                  |
| Asparagales | Platanthera     | azorica       |                                         | 0          | 1             | 0             | 0               | (Bateman et al. 2014)                                                                    |
| Asparagales | Platanthera     | chlorantha    |                                         | 1          | 1             | 0             | 0               | (Bidartondo et al. 2004)                                                                 |
| Asparagales | Platanthera     | micrantha     |                                         | 0          | 1             | 0             | 0               | (Bateman et al. 2014)                                                                    |
| Asparagales | Pseudorchis     | albida        |                                         | 1          | 1             | 0             | 0               | (Kohout et al. 2013)                                                                     |
| Asparagales | Pterostylis     | nutans        |                                         | 0          | 1             | 0             | 0               | (Irwin et al. 2007)                                                                      |
| Asparagales | Pterygodium     | catholicum    |                                         | 0          | 1             | 0             | 0               | (Waterman et al. 2011)                                                                   |
| Asparagales | Pyrorchis       | nigricans     |                                         | 0          | 1             | 0             | 0               | (Sommer et al. 2012)                                                                     |
| Asparagales | Rhomboda        | cristata      | Hetaeria cristata (Ormerod 2008)        | 0          | 1             | 0             | 0               | (Shefferson et al. 2010)                                                                 |
| Asparagales | Serapias        | cordigera     |                                         | 0          | 1             | 0             | 0               | (Ercole et al. 2013)                                                                     |
| Asparagales | Spiranthes      | sinensis      |                                         | 0          | 1             | 0             | 0               | (Shimura et al. 2009)                                                                    |
| Asparagales | Tainia          | latifolia     |                                         | 0          | 1             | 0             | 0               | (Jiang et al. 2012b)                                                                     |
| Asparagales | Tipularia       | discolor      |                                         | 0          | 1             | 0             | 0               | (McCormick et al. 2004)                                                                  |
| Asparagales | Tricoryne       | elatior       |                                         | 0          | 0             | 1             | 0               | (Opik et al. 2010)                                                                       |
| Asparagales | Trizeuxis       | falcata       |                                         | 0          | 1             | 0             | 0               | (Mosquera-Espinosa et al. 2010)                                                          |
| Asparagales | Wulfschlaegelia | aphylla       |                                         | 0          | 1             | 0             | 0               | (Martos et al. 2009)                                                                     |
| Asparagales | Zeuxine         | agyokuana     | Hetaeria agyokuana (Xinqi et al. 2009)  | 0          | 1             | 0             | 0               | (Shefferson et al. 2010)                                                                 |
| Asparagales | Zeuxine         | strateumatica |                                         | 0          | 1             | 0             | 0               | (Jiang et al. 2014)                                                                      |
| Asterales   | Achillea        | millefolium   |                                         | 0          | 0             | 1             | 0               | (Opik et al. 2010)                                                                       |
| Asterales   | Antennaria      | dioica        |                                         | 0          | 0             | 1             | 0               | (Opik et al. 2010)                                                                       |
| Asterales   | Arnica          | montana       |                                         | 0          | 0             | 1             | 0               | (Opik et al. 2010)                                                                       |
| Asterales   | Artemisia       | frigida       |                                         | 0          | 0             | 1             | 0               | (Opik et al. 2010)                                                                       |
| Asterales   | Artemisia       | ludoviciana   |                                         | 0          | 0             | 1             | 0               | (Opik et al. 2010)                                                                       |
| Asterales   | Artemisia       | vulgaris      |                                         | 0          | 0             | 1             | 0               | (Opik et al. 2010)                                                                       |
| Asterales   | Aster           | tripolium     |                                         | 0          | 0             | 1             | 0               | (Opik et al. 2010)                                                                       |
| Asterales   | Campanula       | punctata      |                                         | 0          | 0             | 1             | 0               | (Opik et al. 2010)                                                                       |
| Asterales   | Carduus         | tenuiflorus   |                                         | 0          | 0             | 1             | 0               | (Opik et al. 2010)                                                                       |
| Asterales   | Centaurea       | jacea         |                                         | 0          | 0             | 1             | 0               | (Opik et al. 2010)                                                                       |
| Asterales   | Conyza          | canadensis    |                                         | 0          | 0             | 1             | 0               | (Gazol et al. 2016)                                                                      |
| Asterales   | Cynara          | cardunculus   | Cynara scolymus (Ancora 1986)           | 0          | 0             | 1             | 0               | (Opik et al. 2010)                                                                       |
| Asterales   | Elephantopus    | scaber        |                                         | 0          | 0             | 1             | 0               | (Opik et al. 2010)                                                                       |
| Asterales   | Helianthus      | annuus        |                                         | 0          | 0             | 1             | 0               | (Opik et al. 2010)                                                                       |
| Asterales   | Helichrysum     | stoechas      |                                         | 0          | 0             | 1             | 0               | (Torrecillas et al. 2014)                                                                |
| Asterales   | Heterotheca     | villosa       |                                         | 0          | 0             | 1             | 0               | (Opik et al. 2010)                                                                       |
| Asterales   | Hypochoeris     | radicata      | Hypochoeris radicata                    | 0          | 0             | 1             | 0               | (Opik et al. 2010)                                                                       |
| Asterales   | Inula           | conyza        |                                         | 0          | 0             | 1             | 0               | (Wang and Qiu 2006; Del Fabbro and Prati 2014)                                           |
| Asterales   | Jacobaea        | vulgaris      |                                         | 0          | 0             | 1             | 0               | (Opik et al. 2010)                                                                       |



| order            | genus         | species       | Synonym/subspecies/alternative spelling             | Ascomycota | Basidiomycota | Glomeromycota | Mucoromycotina | References                                                                                      |
|------------------|---------------|---------------|-----------------------------------------------------|------------|---------------|---------------|----------------|-------------------------------------------------------------------------------------------------|
| Asterales        | Leontodon     | hispidus      |                                                     | 0          | 0             | 1             | 0              | (Sýkorová et al. 2007b)                                                                         |
| Asterales        | Ligularia     | virgaurea     |                                                     | 0          | 0             | 1             | 0              | (Opik et al. 2010)                                                                              |
| Asterales        | Lobelia       | dortmanna     |                                                     | 1          | 0             | 1             | 0              | (Opik et al. 2010; Kohout et al. 2012)                                                          |
| Asterales        | Pilosella     | officinatum   | Hieracium pilosella (Ferrer-Gallego and Mateo 2015) | 0          | 0             | 1             | 0              | (Opik et al. 2010)                                                                              |
| Asterales        | Saussurea     | involuta      |                                                     | 1          | 0             | 0             | 0              | (Wu and Guo 2008)                                                                               |
| Asterales        | Solidago      | canadensis    |                                                     | 0          | 0             | 1             | 0              | (Yuan et al. 2014)                                                                              |
| Asterales        | Solidago      | gigantea      |                                                     | 0          | 0             | 1             | 0              | (Opik et al. 2010)                                                                              |
| Asterales        | Solidago      | missouriensis |                                                     | 0          | 0             | 1             | 0              | (Opik et al. 2010)                                                                              |
| Asterales        | Solidago      | rugosa        |                                                     | 0          | 0             | 1             | 0              | (Opik et al. 2010)                                                                              |
| Asterales        | Solidago      | virgaurea     |                                                     | 0          | 0             | 1             | 0              | (Opik et al. 2010)                                                                              |
| Asterales        | Sonchus       | tenerrimus    |                                                     | 0          | 0             | 1             | 0              | (Opik et al. 2010)                                                                              |
| Asterales        | Tanacetum     | vulgare       |                                                     | 0          | 0             | 1             | 0              | (Opik et al. 2010)                                                                              |
| Asterales        | Taraxacum     | officinale    |                                                     | 0          | 0             | 1             | 0              | (Opik et al. 2010)                                                                              |
| Asterales        | Tragopogon    | pratensis     |                                                     | 0          | 0             | 1             | 0              | (Opik et al. 2010)                                                                              |
| Austrobaileyales | Austrobaileya | scandens      |                                                     | 0          | 0             | 1             | 0              | (Opik et al. 2010)                                                                              |
| Boraginales      | Pulmonaria    | obscura       |                                                     | 0          | 0             | 1             | 0              | (Saks et al. 2014)                                                                              |
| Boraginales      | Trachystemon  | orientalis    |                                                     | 0          | 0             | 1             | 0              | (Opik et al. 2010)                                                                              |
| Brassicales      | Boschia       | foetida       |                                                     | 0          | 0             | 1             | 0              | (Opik et al. 2010)                                                                              |
| Brassicales      | Brassica      | napus         |                                                     | 0          | 0             | 1             | 0              | (Wang and Qiu 2006; (?) 2011)                                                                   |
| Brassicales      | Cardamine     | pratensis     |                                                     | 0          | 0             | 1             | 0              | (Renker et al. 2003)                                                                            |
| Brassicales      | Moringa       | drouhardii    |                                                     | 0          | 0             | 1             | 0              | (Opik et al. 2010)                                                                              |
| Brassicales      | Moringa       | hildebrandtii |                                                     | 0          | 0             | 1             | 0              | (Opik et al. 2010)                                                                              |
| Brassicales      | Moringa       | oleifera      |                                                     | 0          | 0             | 1             | 0              | (Opik et al. 2010)                                                                              |
| Brassicales      | Noccaea       | caerulescens  | Thlaspi caerulescens (Ingrouille and Smirnoff 1986) | 0          | 0             | 1             | 0              | (Opik et al. 2010)                                                                              |
| Brassicales      | Salvadora     | persica       |                                                     | 0          | 0             | 1             | 0              | (Symanczik et al. 2014)                                                                         |
| Brassicales      | Subularia     | aquatica      |                                                     | 0          | 0             | 0             | 0              | (Kohout et al. 2012)                                                                            |
| Brassicales      | Thlaspi       | arvense       |                                                     | 0          | 0             | 1             | 0              | (Opik et al. 2010)                                                                              |
| Caryophyllales   | Arthrocnemum  | macrostachyum |                                                     | 0          | 0             | 1             | 0              | (Opik et al. 2010)                                                                              |
| Caryophyllales   | Bistorta      | vivipara      |                                                     | 1          | 1             | 1             | 0              | (Wang and Qiu 2006; Brevik et al. 2010; Blaaid 2012; Kauserud et al. 2012; Garnica et al. 2013) |
| Caryophyllales   | Dysphania     | ambrosioides  |                                                     | 0          | 0             | 1             | 0              | (Opik et al. 2010)                                                                              |
| Caryophyllales   | Fagopyrum     | esculentum    |                                                     | 0          | 0             | 1             | 0              | (Likar et al. 2008)                                                                             |
| Caryophyllales   | Fagopyrum     | tataricum     |                                                     | 0          | 0             | 1             | 0              | (Opik et al. 2010)                                                                              |
| Caryophyllales   | Guapira       | discolor      |                                                     | 0          | 1             | 0             | 0              | (Hayward and Horton 2014)                                                                       |
| Caryophyllales   | Guapira       | fragrans      |                                                     | 0          | 1             | 0             | 0              | (Hayward and Horton 2014)                                                                       |
| Caryophyllales   | Phytolacca    | americana     |                                                     | 0          | 0             | 1             | 0              | (Opik et al. 2010)                                                                              |
| Caryophyllales   | Pisonia       | aculeata      |                                                     | 0          | 1             | 0             | 0              | (Hayward and Horton 2014)                                                                       |
| Caryophyllales   | Pisonia       | albida        |                                                     | 0          | 1             | 0             | 0              | (Hayward and Horton 2014)                                                                       |
| Caryophyllales   | Pisonia       | grandis       |                                                     | 0          | 1             | 0             | 0              | (Hayward and Horton 2014)                                                                       |
| Caryophyllales   | Pisonia       | sandwicensis  |                                                     | 0          | 1             | 0             | 0              | (Hayward and Horton 2014)                                                                       |
| Caryophyllales   | Pisonia       | sechellarum   |                                                     | 0          | 0             | 1             | 0              | (Opik et al. 2010)                                                                              |
| Caryophyllales   | Pisonia       | taina         |                                                     | 0          | 1             | 0             | 0              | (Hayward and Horton 2014)                                                                       |
| Caryophyllales   | Polygonum     | cuspidatum    |                                                     | 0          | 0             | 1             | 0              | (Opik et al. 2010)                                                                              |
| Caryophyllales   | Salicornia    | europaea      |                                                     | 0          | 0             | 1             | 0              | (Opik et al. 2010)                                                                              |
| Chloranthales    | Hedyosmum     | goudotianum   |                                                     | 0          | 0             | 1             | 0              | (Kottke et al. 2004)                                                                            |
| Commelinales     | Commelina     | benghalensis  |                                                     | 0          | 0             | 1             | 0              | (Opik et al. 2010)                                                                              |
| Cornales         | Cornus        | suecica       |                                                     | 0          | 0             | 1             | 0              | (Opik et al. 2010)                                                                              |
| Cucurbitales     | Citrullus     | colocynthis   |                                                     | 0          | 0             | 1             | 0              | (Opik et al. 2010)                                                                              |
| Cucurbitales     | Gynostemma    | pentaphyllum  |                                                     | 0          | 0             | 1             | 0              | (Zhou and Guo 2013)                                                                             |
| Dioscoreales     | Burmanna      | capitata      |                                                     | 0          | 0             | 1             | 0              | (Opik et al. 2010)                                                                              |
| Dioscoreales     | Dioscorea     | rotundata     |                                                     | 0          | 0             | 1             | 0              | (Opik et al. 2010)                                                                              |

| order        | genus           | species        | Synonym/subspecies/alternative spelling | Ascomycota | Basidiomycota | Glomeromycota | Mucoromycotina | References                                                                             |
|--------------|-----------------|----------------|-----------------------------------------|------------|---------------|---------------|----------------|----------------------------------------------------------------------------------------|
| Dioscoreales | Tacca           | plantaginea    |                                         | 0          | 0             | 1             | 0              | (Opik et al. 2010)                                                                     |
| Dioscoreales | Thismia         | rodwayi        |                                         | 0          | 0             | 1             | 0              | (Opik et al. 2010)                                                                     |
| Dipsacales   | Knautia         | arvensis       |                                         | 0          | 0             | 1             | 0              | (Opik et al. 2010)                                                                     |
| Dipsacales   | Linnaea         | borealis       |                                         | 0          | 0             | 1             | 0              | (Opik et al. 2010)                                                                     |
| Ericales     | Aegiceras       | corniculatum   |                                         | 0          | 0             | 1             | 0              | (Sharma and Kothamasi 2013)                                                            |
| Ericales     | Agarista        | salicifolia    |                                         | 0          | 1             | 0             | 0              | (Selosse et al. 2007)                                                                  |
| Ericales     | Anagallis       | arvensis       |                                         | 0          | 0             | 1             | 0              | (Torrecillas et al. 2012)                                                              |
| Ericales     | Andromeda       | polifolia      |                                         | 1          | 1             | 0             | 0              | (Selosse et al. 2007; Kjølner et al. 2010)                                             |
| Ericales     | Arbutus         | unedo          |                                         | 1          | 1             | 0             | 0              | (Selosse et al. 2007; Setaro and Kron 2011; Lancellotti et al. 2014)                   |
| Ericales     | Arctostaphylos  | uva-ursi       |                                         | 1          | 1             | 0             | 0              | (Krpata et al. 2007)                                                                   |
| Ericales     | Calluna         | vulgaris       |                                         | 1          | 1             | 1             | 0              | (Duckett and Read 1991; Selosse et al. 2007; Horn et al. 2013)                         |
| Ericales     | Camellia        | japonica       |                                         | 0          | 0             | 1             | 0              | (Borriello et al. 2015)                                                                |
| Ericales     | Chimaphila      | umbellata      |                                         | 1          | 1             | 0             | 0              | (Tedersoo et al. 2007a; Zimmer et al. 2007)                                            |
| Ericales     | Comarostaphylis | arbutoides     |                                         | 1          | 1             | 0             | 0              | (Hutchison and Piche 1995; Kühdorf et al. 2016)                                        |
| Ericales     | Empetrum        | nigrum         |                                         | 1          | 1             | 0             | 0              | (Selosse et al. 2007; Kjølner et al. 2010)                                             |
| Ericales     | Enkianthus      | campanulatus   |                                         | 0          | 0             | 1             | 0              | (Opik et al. 2010)                                                                     |
| Ericales     | Enkianthus      | cernuus        |                                         | 0          | 0             | 1             | 0              | (Obase et al. 2013)                                                                    |
| Ericales     | Enkianthus      | nudipes        |                                         | 0          | 0             | 1             | 0              | (Obase et al. 2013)                                                                    |
| Ericales     | Enkianthus      | perulatus      |                                         | 0          | 0             | 1             | 0              | (Obase et al. 2013)                                                                    |
| Ericales     | Enkianthus      | sikokianus     |                                         | 0          | 0             | 1             | 0              | (Obase et al. 2013)                                                                    |
| Ericales     | Enkianthus      | subsessilis    |                                         | 0          | 0             | 1             | 0              | (Obase et al. 2013)                                                                    |
| Ericales     | Erica           | carnea         |                                         | 1          | 0             | 0             | 0              | (Duclos et al. 1982; Grunewaldt-Stöcker et al. 2013)                                   |
| Ericales     | Erica           | ciliaris       |                                         | 0          | 1             | 0             | 0              | (Selosse et al. 2007)                                                                  |
| Ericales     | Erica           | cinerea        |                                         | 1          | 1             | 0             | 0              | (Duckett and Read 1991; Selosse et al. 2007)                                           |
| Ericales     | Erica           | vagans         |                                         | 0          | 1             | 0             | 0              | (Selosse et al. 2007)                                                                  |
| Ericales     | Gaultheria      | procumbens     |                                         | 0          | 1             | 0             | 0              | (Selosse et al. 2007; Setaro and Kron 2011)                                            |
| Ericales     | Gaultheria      | shallon        |                                         | 1          | 1             | 0             | 0              | (Allen et al. 2003; Selosse et al. 2007; Setaro and Kron 2011)                         |
| Ericales     | Orthilia        | secunda        |                                         | 1          | 1             | 0             | 0              | (Selosse et al. 2007; Tedersoo et al. 2007a; Zimmer et al. 2007; Setaro and Kron 2011) |
| Ericales     | Purdiaea        | nutans         |                                         | 0          | 0             | 1             | 0              | (Haug et al. 2010)                                                                     |
| Ericales     | Pyrola          | minor          |                                         | 0          | 1             | 0             | 0              | (Zimmer et al. 2007)                                                                   |
| Ericales     | Pyrola          | rotundifolia   |                                         | 1          | 1             | 0             | 0              | (Vincenot et al. 2008; Setaro and Kron 2011)                                           |
| Ericales     | Rhododendron    | decorum        |                                         | 1          | 1             | 0             | 0              | (Selosse et al. 2007; Tian et al. 2011)                                                |
| Ericales     | Rhododendron    | ferrugineum    |                                         | 0          | 1             | 0             | 0              | (Selosse et al. 2007)                                                                  |
| Ericales     | Rhododendron    | fortunei       |                                         | 1          | 1             | 0             | 0              | (Zhang et al. 2009)                                                                    |
| Ericales     | Rhododendron    | groenlandicum  |                                         | 0          | 1             | 0             | 0              | (Selosse et al. 2007)                                                                  |
| Ericales     | Rhododendron    | racemosum      |                                         | 0          | 1             | 0             | 0              | (Selosse et al. 2007)                                                                  |
| Ericales     | Rhododendron    | tomentosum     | Ledum palustre (Harmaja 1991)           | 0          | 1             | 0             | 0              | (Selosse et al. 2007)                                                                  |
| Ericales     | Schizocodon     | soldanelloides |                                         | 1          | 0             | 0             | 0              | (Okuda et al. 2011)                                                                    |
| Ericales     | Trientalis      | europaea       |                                         | 0          | 0             | 1             | 0              | (Opik et al. 2010)                                                                     |
| Ericales     | Vaccinium       | myrtilus       |                                         | 1          | 1             | 1             | 0              | (Duckett and Read 1991; Selosse et al. 2007; Horn et al. 2013)                         |
| Ericales     | Vaccinium       | oxycoccos      |                                         | 1          | 1             | 0             | 0              | (Duckett and Read 1991; Selosse et al. 2007)                                           |
| Ericales     | Vaccinium       | poasanum       |                                         | 0          | 1             | 0             | 0              | (Setaro and Kron 2011)                                                                 |
| Ericales     | Vaccinium       | uliginosum     |                                         | 1          | 1             | 0             | 0              | (Selosse et al. 2007; Kjølner et al. 2010; Setaro and Kron 2011)                       |
| Ericales     | Vaccinium       | vitis-idaea    |                                         | 1          | 1             | 0             | 0              | (Selosse et al. 2007; Kjølner et al. 2010)                                             |
| Ericales     | Woollsia        | pungens        |                                         | 1          | 0             | 0             | 0              | (Midgley et al. 2004; Chambers et al. 2008)                                            |
| Fabales      | Acacia          | mangium        |                                         | 0          | 1             | 1             | 0              | (Weber et al. 2005; Aggangan et al. 2010)                                              |
| Fabales      | Azalia          | africana       |                                         | 0          | 1             | 0             | 0              | (Diédhiou et al. 2004)                                                                 |
| Fabales      | Arachis         | hypogaea       |                                         | 0          | 0             | 1             | 0              | (Lee et al. 2008)                                                                      |
| Fabales      | Cajanus         | cajan          |                                         | 0          | 0             | 1             | 0              | (Opik et al. 2010)                                                                     |
| Fabales      | Caragana        | korshinskii    |                                         | 0          | 0             | 1             | 0              | (Opik et al. 2010)                                                                     |

| order   | genus         | species       | Synonym/subspecies/alternative spelling      | Ascomycota | Basidiomycota | Glomeromycota | Mucoromycotina | References                                                           |
|---------|---------------|---------------|----------------------------------------------|------------|---------------|---------------|----------------|----------------------------------------------------------------------|
| Fabales | Delonix       | regia         |                                              | 0          | 0             | 1             | 0              | (Manoharan et al. 2008)                                              |
| Fabales | Dichrostachys | cinerea       |                                              | 0          | 0             | 1             | 0              | (Opik et al. 2010)                                                   |
| Fabales | Dicorynia     | guianensis    |                                              | 0          | 0             | 1             | 0              | (Opik et al. 2010)                                                   |
| Fabales | Eperua        | falcata       |                                              | 0          | 0             | 1             | 0              | (Opik et al. 2010)                                                   |
| Fabales | Eperua        | grandiflora   |                                              | 0          | 0             | 1             | 0              | (Opik et al. 2010)                                                   |
| Fabales | Genista       | cinerea       |                                              | 0          | 0             | 1             | 0              | (Opik et al. 2010)                                                   |
| Fabales | Gliciridia    | sepium        |                                              | 0          | 0             | 1             | 0              | (Opik et al. 2010)                                                   |
| Fabales | Glycine       | max           |                                              | 0          | 0             | 1             | 0              | (Opik et al. 2010)                                                   |
| Fabales | Hymenostegia  | ngouniensis   | ngounyensis                                  | 0          | 0             | 1             | 0              | (Opik et al. 2010)                                                   |
| Fabales | Inga          | acreana       |                                              | 0          | 0             | 1             | 0              | (Opik et al. 2010)                                                   |
| Fabales | Inga          | edulis        |                                              | 0          | 0             | 1             | 0              | (Opik et al. 2010)                                                   |
| Fabales | Intsia        | bijuga        |                                              | 0          | 1             | 0             | 0              | (Tedersoo et al. 2007b)                                              |
| Fabales | Kummerowia    | striata       |                                              | 0          | 0             | 1             | 0              | (Zhang et al. 2010b)                                                 |
| Fabales | Lotus         | brunneri      |                                              | 0          | 0             | 1             | 0              | (Opik et al. 2013)                                                   |
| Fabales | Lotus         | corniculatus  |                                              | 0          | 0             | 1             | 0              | (Opik et al. 2010)                                                   |
| Fabales | Lotus         | jacobaeus     |                                              | 0          | 0             | 1             | 0              | (Opik et al. 2010)                                                   |
| Fabales | Lotus         | japonicus     |                                              | 0          | 0             | 1             | 0              | (Opik et al. 2010)                                                   |
| Fabales | Lupinus       | latifolius    |                                              | 0          | 0             | 0             | 0              | (Titus et al. 1998)                                                  |
| Fabales | Medicago      | murex         |                                              | 0          | 0             | 1             | 0              | (Opik et al. 2010)                                                   |
| Fabales | Medicago      | polymorpha    |                                              | 0          | 0             | 1             | 0              | (Opik et al. 2010)                                                   |
| Fabales | Medicago      | truncatula    |                                              | 0          | 0             | 1             | 0              | (Opik et al. 2010)                                                   |
| Fabales | Melilotus     | albus         | melilotus alba                               | 0          | 0             | 1             | 0              | (Opik et al. 2010)                                                   |
| Fabales | Ononis        | repens        |                                              | 0          | 0             | 1             | 0              | (Opik et al. 2010)                                                   |
| Fabales | Phaseolus     | vulgaris      |                                              | 0          | 0             | 1             | 0              | (Opik et al. 2010)                                                   |
| Fabales | Pisum         | sativum       |                                              | 0          | 0             | 1             | 0              | (Opik et al. 2010)                                                   |
| Fabales | Polygala      | amara         |                                              | 0          | 0             | 1             | 0              | (Rath et al. 2013)                                                   |
| Fabales | Polygala      | calcarea      |                                              | 0          | 0             | 1             | 0              | (Rath et al. 2013)                                                   |
| Fabales | Polygala      | comosa        |                                              | 0          | 0             | 1             | 0              | (Rath et al. 2013)                                                   |
| Fabales | Polygala      | myrtifolia    |                                              | 0          | 0             | 1             | 0              | (Rath et al. 2013)                                                   |
| Fabales | Polygala      | rupestris     |                                              | 0          | 0             | 1             | 0              | (Rath et al. 2013)                                                   |
| Fabales | Polygala      | serpyllifolia |                                              | 0          | 0             | 1             | 0              | (Rath et al. 2013)                                                   |
| Fabales | Polygala      | vulgaris      |                                              | 0          | 0             | 1             | 0              | (Rath et al. 2013)                                                   |
| Fabales | Retama        | sphaerocarpa  |                                              | 0          | 0             | 1             | 0              | (Opik et al. 2010)                                                   |
| Fabales | Robinia       | pseudoacacia  |                                              | 0          | 0             | 1             | 0              | (Bratek et al. 1996)                                                 |
| Fabales | Senegalia     | senegal       | Acacia Senegal (KYALANGALILWA et al. 2012;)  | 0          | 0             | 1             | 0              | (Ndoye et al. 2012)                                                  |
| Fabales | Trifolium     | pratense      |                                              | 0          | 0             | 1             | 0              | (Börstler et al. 2006; Opik et al. 2010)                             |
| Fabales | Trifolium     | repens        |                                              | 0          | 0             | 1             | 0              | (Börstler et al. 2006; Opik et al. 2010)                             |
| Fabales | Trifolium     | subterraneum  |                                              | 0          | 0             | 1             | 0              | (Opik et al. 2010)                                                   |
| Fabales | Vachellia     | erioloba      | Acacia erioloba (KYALANGALILWA et al. 2012;) | 0          | 0             | 1             | 0              | (Opik et al. 2010)                                                   |
| Fabales | Vicia         | faba          |                                              | 0          | 0             | 1             | 0              | (Opik et al. 2010)                                                   |
| Fabales | Vicia         | hirsuta       |                                              | 0          | 0             | 1             | 0              | (Opik et al. 2010)                                                   |
| Fabales | Vicia         | sativa        |                                              | 0          | 0             | 1             | 0              | (Opik et al. 2010)                                                   |
| Fabales | Vicia         | tetrasperma   |                                              | 0          | 0             | 1             | 0              | (Opik et al. 2010)                                                   |
| Fabales | Vigna         | unguiculata   |                                              | 0          | 0             | 1             | 0              | (Johnson et al. 2016)                                                |
| Fagales | Alnus         | acuminata     |                                              | 0          | 1             | 0             | 0              | (Pritsch et al. 2010)                                                |
| Fagales | Alnus         | alnobetula    |                                              | 0          | 1             | 0             | 0              | (Moreau et al. 2011)                                                 |
| Fagales | Alnus         | cordata       |                                              | 0          | 1             | 0             | 0              | (Jargeat et al. 2016)                                                |
| Fagales | Alnus         | glutinosa     |                                              | 1          | 1             | 1             | 0              | (Tedersoo et al. 2009b; Jargeat et al. 2016; Sýkorová et al. 2016)   |
| Fagales | Alnus         | incana        |                                              | 1          | 1             | 1             | 0              | (Chatarpaul et al. 1989; Tedersoo et al. 2009b; Jargeat et al. 2016) |
| Fagales | Alnus         | nitida        |                                              | 1          | 1             | 0             | 0              | (Ilyas 2013)                                                         |

| order       | genus        | species       | Synonym/subspecies/alternative spelling           | Ascomycota | Basidiomycota | Glomeromycota | Mucoromycotina | References                                                                                      |
|-------------|--------------|---------------|---------------------------------------------------|------------|---------------|---------------|----------------|-------------------------------------------------------------------------------------------------|
| Fagales     | Alnus        | rubra         |                                                   | 0          | 1             | 0             | 0              | (Kennedy and Hill 2010)                                                                         |
| Fagales     | Betula       | alleganiensis |                                                   | 1          | 1             | 0             | 0              | (Coburn 2003; Poznanovic et al. 2014)                                                           |
| Fagales     | Betula       | papyrifera    |                                                   | 1          | 1             | 0             | 0              | (Twieg et al. 2009)                                                                             |
| Fagales     | Betula       | pendula       |                                                   | 1          | 1             | 0             | 0              | (Bidartondo et al. 2003; Pasonen et al. 2009)                                                   |
| Fagales     | Betula       | platyphylla   |                                                   | 1          | 1             | 0             | 0              | (Hashimoto and Hyakumachi 2000)                                                                 |
| Fagales     | Betula       | pubescens     |                                                   | 1          | 1             | 0             | 0              | (Duckett and Read 1991; Vrålstad et al. 2002)                                                   |
| Fagales     | Carya        | illinoensis   |                                                   | 1          | 1             | 0             | 0              | (Bonito et al. 2011)                                                                            |
| Fagales     | Castanea     | dentata       |                                                   | 1          | 1             | 0             | 0              | (Bauman et al. 2013; D'Amico et al. 2015)                                                       |
| Fagales     | Castanea     | mollissima    |                                                   | 1          | 1             | 0             | 0              | (D'Amico et al. 2015; Chen et al. 2016b)                                                        |
| Fagales     | Castanea     | sativa        |                                                   | 0          | 1             | 0             | 0              | (Girlanda et al. 2006)                                                                          |
| Fagales     | Castanopsis  | fargesii      |                                                   | 1          | 1             | 0             | 0              | (Wang et al. 2011)                                                                              |
| Fagales     | Casuarina    | equisetifolia |                                                   | 1          | 1             | 1             | 0              | (Theodorou and Reddell 1991; Sempavalan et al. 1995)                                            |
| Fagales     | Corylus      | avellana      |                                                   | 1          | 1             | 0             | 0              | (Benucci et al. 2011)                                                                           |
| Fagales     | Corylus      | colurna       |                                                   | 0          | 1             | 0             | 0              | (Weiss et al. 2004)                                                                             |
| Fagales     | Fagus        | grandifolia   |                                                   | 0          | 1             | 0             | 0              | (Montoya et al. 2010; Garay-Serrano et al. 2012)                                                |
| Fagales     | Fagus        | sylvatica     |                                                   | 1          | 1             | 0             | 0              | (Duckett and Read 1991; Erős-Honti et al. 2008; Trocha et al. 2016)                             |
| Fagales     | Juglans      | regia         |                                                   | 0          | 1             | 1             | 0              | (Dolcet-Sanjuan et al. 1996; Ilyas et al. 2013)                                                 |
| Fagales     | Lophozonia   | cunninghamii  | Nothofagus cunninghamii (Heenan and Smissen 2013) | 1          | 1             | 0             | 0              | (Tedersoo et al. 2009a)                                                                         |
| Fagales     | Lophozonia   | menziesii     | Nothofagus menziesii (Heenan and Smissen 2013)    | 1          | 1             | 0             | 0              | (Orlovich et al. 2013)                                                                          |
| Fagales     | Ostrya       | carpinifolia  |                                                   | 1          | 1             | 0             | 0              | (Benucci et al. 2011)                                                                           |
| Fagales     | Quercus      | agrifolia     |                                                   | 0          | 1             | 1             | 0              | (Egerton-Warburton and Allen 2001)                                                              |
| Fagales     | Quercus      | alba          |                                                   | 1          | 1             | 0             | 0              | (Southworth 2013)                                                                               |
| Fagales     | Quercus      | cerris        |                                                   | 1          | 1             | 0             | 0              | (Jakucs et al. 2005; Erős-Honti et al. 2008; Pereira et al. 2013)                               |
| Fagales     | Quercus      | douglasii     |                                                   | 1          | 1             | 1             | 0              | (Opik et al. 2010; Southworth 2013)                                                             |
| Fagales     | Quercus      | fabri         |                                                   | 1          | 1             | 0             | 0              | (Huang et al. 2014)                                                                             |
| Fagales     | Quercus      | ilex          |                                                   | 1          | 1             | 0             | 0              | (Girlanda et al. 2006; Southworth 2013)                                                         |
| Fagales     | Quercus      | incana        |                                                   | 1          | 1             | 0             | 0              | (Ilyas 2013; Ilyas et al. 2013)                                                                 |
| Fagales     | Quercus      | petraea       |                                                   | 1          | 1             | 0             | 0              | (Southworth 2013)                                                                               |
| Fagales     | Quercus      | phellos       |                                                   | 1          | 1             | 0             | 0              | (Healy et al. 2012; Bonito et al. 2014)                                                         |
| Fagales     | Quercus      | pubescens     |                                                   | 1          | 1             | 0             | 0              | (Giomaro et al. 2002; Girlanda et al. 2006)                                                     |
| Fagales     | Quercus      | robur         |                                                   | 1          | 1             | 0             | 0              | (Erős-Honti et al. 2008; Trocha et al. 2012; Pereira et al. 2013; Southworth 2013)              |
| Fagales     | Quercus      | rubra         |                                                   | 1          | 1             | 1             | 0              | (Dickie et al. 2001; Trocha et al. 2012; Southworth 2013; Chen et al. 2016b; Healy et al. 2016) |
| Fagales     | Quercus      | salicina      |                                                   | 0          | 1             | 0             | 0              | (Kayama and Yamanaka 2014)                                                                      |
| Fagales     | Quercus      | suber         |                                                   | 1          | 1             | 0             | 0              | (Lancellotti and Franceschini 2013)                                                             |
| Fagales     | Quercus      | variabilis    |                                                   | 1          | 1             | 0             | 0              | (Zong et al. 2015)                                                                              |
| Fagales     | Quercus      | wislizeni     |                                                   | 1          | 1             | 0             | 0              | (Southworth 2013)                                                                               |
| Fagales     | Trisyngyne   | balansae      | Nothofagus balansae (Heenan and Smissen 2013)     | 0          | 1             | 0             | 0              | (Prin et al. 2012)                                                                              |
| Fagales     | Trisyngyne   | codonandra    | Nothofagus codonandra (Heenan and Smissen 2013)   | 0          | 1             | 0             | 0              | (Prin et al. 2012)                                                                              |
| Gentianales | Cinchona     | officinalis   |                                                   | 0          | 0             | 1             | 0              | (Opik et al. 2010)                                                                              |
| Gentianales | Coffea       | arabica       |                                                   | 0          | 0             | 1             | 0              | (De Beenhouwer et al. 2015)                                                                     |
| Gentianales | Faramea      | occidentalis  |                                                   | 0          | 0             | 1             | 0              | (Opik et al. 2010)                                                                              |
| Gentianales | Galium       | album         |                                                   | 0          | 0             | 1             | 0              | (Börstler et al. 2006)                                                                          |
| Gentianales | Galium       | aparine       |                                                   | 0          | 0             | 1             | 0              | (Opik et al. 2010)                                                                              |
| Gentianales | Vincetoxicum | rossicum      |                                                   | 0          | 0             | 1             | 0              | (Bongard 2013)                                                                                  |
| Geraniales  | Geranium     | pratense      |                                                   | 0          | 0             | 1             | 0              | (Opik et al. 2010)                                                                              |
| Lamiales    | Acanthus     | ilicifolius   |                                                   | 0          | 0             | 1             | 0              | (Gupta et al. 2002; D'Souza and Rodrigues 2013)                                                 |
| Lamiales    | Ajuga        | reptans       |                                                   | 0          | 0             | 1             | 0              | (Opik et al. 2010)                                                                              |
| Lamiales    | Avicennia    | officinalis   |                                                   | 0          | 0             | 1             | 0              | (D'Souza and Rodrigues 2013)                                                                    |
| Lamiales    | Callicarpa   | americana     |                                                   | 0          | 0             | 1             | 0              | (Nalian et al. 2010)                                                                            |
| Lamiales    | Erythranthe  | guttata       | Mimulus guttatus (Barker et al. 2012)             | 0          | 0             | 1             | 0              | (Opik et al. 2010)                                                                              |

| order        | genus          | species      | Synonym/subspecies/alternative spelling      | Ascomycota | Basidiomycota | Glomeromycota | Mucoromycotina | References                                                                                     |
|--------------|----------------|--------------|----------------------------------------------|------------|---------------|---------------|----------------|------------------------------------------------------------------------------------------------|
| Lamiales     | Fraxinus       | excelsior    |                                              | 0          | 0             | 1             | 0              | (Opik et al. 2010; Sýkorová et al. 2016)                                                       |
| Lamiales     | Glechoma       | hederacea    |                                              | 0          | 0             | 1             | 0              | (Opik et al. 2010)                                                                             |
| Lamiales     | Handroanthus   | ochraceus    | Tabebuia ochraceae (Grose and Olmstead 2007) | 0          | 0             | 1             | 0              | (Shepherd et al. 2007)                                                                         |
| Lamiales     | Lavandula      | latifolia    |                                              | 0          | 0             | 1             | 0              | (Opik et al. 2010)                                                                             |
| Lamiales     | Ligustrum      | vulgare      |                                              | 0          | 0             | 1             | 0              | (Sýkorová et al. 2016)                                                                         |
| Lamiales     | Littorella     | uniflora     |                                              | 0          | 0             | 1             | 0              | (Opik et al. 2010; Kohout et al. 2012; Kohout et al. 2014)                                     |
| Lamiales     | Olea           | europaea     |                                              | 0          | 0             | 1             | 0              | (Opik et al. 2010)                                                                             |
| Lamiales     | Origanum       | vulgare      |                                              | 0          | 0             | 1             | 0              | (Sýkorová et al. 2007a)                                                                        |
| Lamiales     | Perilla        | frutescens   |                                              | 0          | 0             | 1             | 0              | (Long et al. 2010)                                                                             |
| Lamiales     | Plantago       | afra         |                                              | 0          | 0             | 1             | 0              | (Opik et al. 2010)                                                                             |
| Lamiales     | Plantago       | asiatica     |                                              | 0          | 0             | 1             | 0              | (Yoshimura et al. 2013)                                                                        |
| Lamiales     | Plantago       | lanceolata   |                                              | 0          | 0             | 1             | 0              | (Staddon et al. 1999; Börstler et al. 2006; Opik et al. 2010)                                  |
| Lamiales     | Plantago       | major        |                                              | 0          | 0             | 1             | 0              | (Börstler et al. 2006; Opik et al. 2010)                                                       |
| Lamiales     | Prunella       | vulgaris     |                                              | 0          | 0             | 1             | 0              | (Staddon et al. 1999; Opik et al. 2010; Phillips 2012)                                         |
| Lamiales     | Rosmarinus     | officinalis  |                                              | 0          | 0             | 1             | 0              | (Opik et al. 2010)                                                                             |
| Lamiales     | Tectona        | grandis      |                                              | 0          | 0             | 1             | 0              | (Chaiyasen et al. 2014)                                                                        |
| Lamiales     | Thymus         | praecox      |                                              | 0          | 0             | 1             | 0              | (Obase et al. 2013)                                                                            |
| Lamiales     | Thymus         | pulegioides  |                                              | 0          | 0             | 1             | 0              | (Sýkorová et al. 2007b)                                                                        |
| Lamiales     | Verbena        | officinalis  |                                              | 0          | 0             | 1             | 0              | (Bedini et al. 2010; Opik et al. 2010)                                                         |
| Lamiales     | Veronica       | chamaedrys   |                                              | 0          | 0             | 1             | 0              | (Börstler et al. 2006; Opik et al. 2010)                                                       |
| Laurales     | Cinnamomum     | bejolghota   |                                              | 0          | 1             | 0             | 0              | (Siri-in et al. 2014)                                                                          |
| Laurales     | Litsea         | cubeba       |                                              | 0          | 0             | 1             | 0              | (Long et al. 2010; Opik et al. 2010)                                                           |
| Liliales     | Clintonia      | borealis     |                                              | 0          | 0             | 1             | 0              | (Opik et al. 2010)                                                                             |
| Liliales     | Paris          | incompleta   |                                              | 0          | 0             | 1             | 0              | (Opik et al. 2010)                                                                             |
| Liliales     | Paris          | quadrifolia  |                                              | 0          | 0             | 1             | 0              | (Opik et al. 2010)                                                                             |
| Liliales     | Toxicoscordion | venenosum    | Zigadenus venenosus (Zomlefer and Judd 2002) | 0          | 0             | 1             | 0              | (Phillips 2012)                                                                                |
| Liliales     | Trillium       | grandiflorum |                                              | 0          | 0             | 1             | 0              | (Opik et al. 2010)                                                                             |
| Liliales     | Veratrum       | oxysepalum   |                                              | 0          | 0             | 1             | 0              | (Opik et al. 2010)                                                                             |
| Malpighiales | Excoecaria     | agallocha    |                                              | 0          | 0             | 1             | 0              | (Gupta et al. 2002; Kumar et al. 2008; D'Souza and Rodrigues 2013; Sharma and Kothamasi 2014b) |
| Malpighiales | Hieronyma      | oblonga      | Hyeronima oblonga                            | 0          | 0             | 1             | 0              | (Shepherd et al. 2007; Opik et al. 2010)                                                       |
| Malpighiales | Hypericum      | maculatum    |                                              | 0          | 0             | 1             | 0              | (Opik et al. 2010)                                                                             |
| Malpighiales | Kandelia       | candel       |                                              | 0          | 0             | 1             | 0              | (D'Souza and Rodrigues 2013; Sharma and Kothamasi 2014a)                                       |
| Malpighiales | Mercurialis    | perennis     |                                              | 0          | 0             | 1             | 0              | (Davison et al. 2015)                                                                          |
| Malpighiales | Phyllanthus    | calycinus    |                                              | 0          | 1             | 1             | 0              | (Weiss et al. 2004; Solaiman and Abbott 2008)                                                  |
| Malpighiales | Populus        | alba         |                                              | 1          | 1             | 1             | 0              | (Jakucs et al. 2005; Kovács and Jakucs 2006; Ciatelli et al. 2010)                             |
| Malpighiales | Populus        | balsamifera  |                                              | 0          | 1             | 0             | 0              | (Grubisha et al. 2012)                                                                         |
| Malpighiales | Populus        | davidiana    |                                              | 0          | 1             | 0             | 0              | (Meng and Tang 2001)                                                                           |
| Malpighiales | Populus        | deltooides   |                                              | 1          | 1             | 1             | 0              | (Healy et al. 2012; Bonito et al. 2014; Chen et al. 2016a)                                     |
| Malpighiales | Populus        | euphratica   |                                              | 0          | 0             | 1             | 0              | (Wang et al. 2010)                                                                             |
| Malpighiales | Populus        | nigra        |                                              | 1          | 1             | 1             | 0              | (Gryta et al. 2006; Grubisha et al. 2012; Sýkorová et al. 2016)                                |
| Malpighiales | Populus        | simonii      |                                              | 1          | 1             | 0             | 0              | (Long et al. 2016)                                                                             |
| Malpighiales | Populus        | tremula      |                                              | 1          | 1             | 1             | 0              | (Tedersoo et al. 2006; Grubisha et al. 2012; Tedersoo and Pölme 2012; Sýkorová et al. 2016)    |
| Malpighiales | Populus        | trichocarpa  |                                              | 0          | 1             | 1             | 0              | (Martin et al. 2004; Martin et al. 2008; Grubisha et al. 2012)                                 |
| Malpighiales | Rhizophora     | apiculata    |                                              | 0          | 0             | 1             | 0              | (D'Souza and Rodrigues 2013)                                                                   |
| Malpighiales | Salix          | alba         |                                              | 1          | 1             | 0             | 0              | (Sumorok and Kiedrzyńska 2007)                                                                 |
| Malpighiales | Salix          | arctica      |                                              | 1          | 1             | 0             | 0              | (Timling et al. 2012)                                                                          |
| Malpighiales | Salix          | herbacea     |                                              | 1          | 1             | 0             | 0              | (Mühlmann and Peintner 2008b)                                                                  |
| Malpighiales | Salix          | polaris      |                                              | 1          | 1             | 0             | 0              | (Hryniewicz et al. 2009)                                                                       |
| Malpighiales | Salix          | reinii       |                                              | 1          | 1             | 0             | 0              | (Wu et al. 2005; Nara 2006)                                                                    |
| Malpighiales | Salix          | reticulata   |                                              | 1          | 1             | 0             | 0              | (Ryberg et al. 2009)                                                                           |

| order         | genus         | species       | Synonym/subspecies/alternative spelling | Ascomycota | Basidiomycota | Glomeromycota | Mucoromycotina | References                                                                         |
|---------------|---------------|---------------|-----------------------------------------|------------|---------------|---------------|----------------|------------------------------------------------------------------------------------|
| Malpighiales  | Salix         | tetrasperma   |                                         | 1          | 1             | 0             | 0              | (Ilyas 2013)                                                                       |
| Malvales      | Anisoptera    | costata       |                                         | 0          | 1             | 0             | 0              | (Yuwa-Amornpitak et al. 2006)                                                      |
| Malvales      | Dipterocarpus | tuberculatus  |                                         | 0          | 1             | 0             | 0              | (Yuwa-Amornpitak et al. 2006)                                                      |
| Malvales      | Helianthemum  | squamatum     |                                         | 0          | 0             | 1             | 0              | (Opik et al. 2010)                                                                 |
| Malvales      | Hopea         | odorata       |                                         | 0          | 1             | 0             | 0              | (Yuwa-Amornpitak et al. 2006)                                                      |
| Malvales      | Luehea        | seemannii     |                                         | 0          | 0             | 1             | 0              | (Opik et al. 2010)                                                                 |
| Malvales      | Shorea        | guiso         |                                         | 0          | 1             | 0             | 0              | (Yuwa-Amornpitak et al. 2006)                                                      |
| Malvales      | Shorea        | obtusa        |                                         | 0          | 1             | 0             | 0              | (Yuwa-Amornpitak et al. 2006)                                                      |
| Malvales      | Tilia         | americana     |                                         | 1          | 0             | 0             | 0              | (Giomaro et al. 2002)                                                              |
| Malvales      | Tilia         | cordata       |                                         | 1          | 1             | 1             | 0              | (Harley and Harley 1987; Fini et al. 2011; Lang et al. 2011; Sýkorová et al. 2016) |
| Myrtales      | Alzatea       | verticillata  |                                         | 0          | 0             | 1             | 0              | (Opik et al. 2010)                                                                 |
| Myrtales      | Chamerion     | angustifolium |                                         | 0          | 0             | 1             | 0              | (Staddon et al. 1999)                                                              |
| Myrtales      | Epilobium     | ciliatum      |                                         | 0          | 0             | 1             | 0              | (Opik et al. 2010)                                                                 |
| Myrtales      | Eucalyptus    | camaldulensis |                                         | 0          | 1             | 0             | 0              | (Martin et al. 2002)                                                               |
| Myrtales      | Eucalyptus    | globulus      |                                         | 0          | 1             | 0             | 0              | (Martin et al. 2002)                                                               |
| Myrtales      | Eucalyptus    | gunnii        |                                         | 1          | 1             | 0             | 0              | (Pennington et al. 2011)                                                           |
| Myrtales      | Eucalyptus    | marginata     |                                         | 0          | 1             | 0             | 0              | (Glen et al. 2002; Martin et al. 2002)                                             |
| Myrtales      | Eucalyptus    | nitens        |                                         | 1          | 1             | 0             | 0              | (Pennington et al. 2011)                                                           |
| Myrtales      | Sonneratia    | alba          |                                         | 0          | 0             | 1             | 0              | (D'Souza and Rodrigues 2013; Sharma and Kothamasi 2014c)                           |
| Nymphaeales   | Nymphaea      | alba          |                                         | 0          | 0             | 0             | 0              | (Wang and Qiu 2006)                                                                |
| Oxalidales    | Oxalis        | acetosella    |                                         | 0          | 0             | 1             | 0              | (Opik et al. 2010)                                                                 |
| Oxalidales    | Oxalis        | stricta       | Oxalis europaea (Eiten 1963)            | 0          | 0             | 1             | 0              | (Renker et al. 2005)                                                               |
| Petrosaviales | Japonilirion  | osense        |                                         | 0          | 0             | 1             | 0              | (Yamato et al. 2014)                                                               |
| Piperales     | Piper         | nigrum        |                                         | 0          | 0             | 1             | 0              | (Kandiannan et al. 2000)                                                           |
| Poales        | Agrostis      | capillaris    |                                         | 0          | 0             | 1             | 0              | (Opik et al. 2010)                                                                 |
| Poales        | Agrostis      | scabra        |                                         | 0          | 0             | 1             | 0              | (Opik et al. 2010)                                                                 |
| Poales        | Agrostis      | stolonifera   |                                         | 0          | 0             | 1             | 0              | (Opik et al. 2010)                                                                 |
| Poales        | Ammophila     | arenaria      |                                         | 0          | 0             | 1             | 0              | (Opik et al. 2010)                                                                 |
| Poales        | Ammophila     | breviligulata |                                         | 0          | 0             | 1             | 0              | (Opik et al. 2010)                                                                 |
| Poales        | Andropogon    | gerardii      |                                         | 0          | 0             | 1             | 0              | (Opik et al. 2010)                                                                 |
| Poales        | Anthoxanthum  | odoratum      |                                         | 0          | 0             | 1             | 0              | (Börstler et al. 2006)                                                             |
| Poales        | Aristida      | adscensionis  |                                         | 0          | 0             | 1             | 0              | (Opik et al. 2013)                                                                 |
| Poales        | Arrhenatherum | elatius       |                                         | 0          | 0             | 1             | 0              | (Börstler et al. 2006; Opik et al. 2010)                                           |
| Poales        | Avena         | barbata       |                                         | 0          | 0             | 1             | 0              | (Opik et al. 2010)                                                                 |
| Poales        | Bouteloua     | gracilis      |                                         | 0          | 0             | 1             | 0              | (Opik et al. 2010)                                                                 |
| Poales        | Brachypodium  | pinnatum      |                                         | 0          | 0             | 1             | 0              | (Opik et al. 2010)                                                                 |
| Poales        | Briza         | media         |                                         | 0          | 0             | 1             | 0              | (Opik et al. 2010)                                                                 |
| Poales        | Bromus        | erectus       |                                         | 0          | 0             | 1             | 0              | (Sýkorová et al. 2007a)                                                            |
| Poales        | Bromus        | tectorum      |                                         | 0          | 0             | 1             | 0              | (Opik et al. 2010; Busby et al. 2013)                                              |
| Poales        | Calamagrostis | arundinacea   |                                         | 0          | 0             | 1             | 0              | (Saks et al. 2014)                                                                 |
| Poales        | Cenchrus      | ciliaris      |                                         | 0          | 0             | 1             | 0              | (Opik et al. 2010)                                                                 |
| Poales        | Cymbopogon    | nardus        |                                         | 0          | 0             | 1             | 0              | (Opik et al. 2010)                                                                 |
| Poales        | Cynosurus     | cristatus     |                                         | 0          | 0             | 1             | 0              | (Opik et al. 2010)                                                                 |
| Poales        | Cynosurus     | echinatus     |                                         | 0          | 0             | 1             | 0              | (Opik et al. 2010)                                                                 |
| Poales        | Dactylis      | glomerata     |                                         | 0          | 0             | 1             | 0              | (Börstler et al. 2006; Opik et al. 2010)                                           |
| Poales        | Festuca       | idahoensis    |                                         | 0          | 0             | 1             | 0              | (Phillips 2012)                                                                    |
| Poales        | Festuca       | ovina         |                                         | 0          | 0             | 1             | 0              | (Staddon et al. 1999; Opik et al. 2010)                                            |
| Poales        | Festuca       | pratensis     |                                         | 0          | 0             | 1             | 0              | (Opik et al. 2010)                                                                 |
| Poales        | Festuca       | rubra         |                                         | 0          | 0             | 1             | 0              | (Opik et al. 2010)                                                                 |
| Poales        | Festuca       | rupicola      |                                         | 0          | 0             | 1             | 0              | (Opik et al. 2010)                                                                 |

| order        | genus       | species      | Synonym/subspecies/alternative spelling     | Ascomycota | Basidiomycota | Glomeromycota | Microromycotina | References                                                     |
|--------------|-------------|--------------|---------------------------------------------|------------|---------------|---------------|-----------------|----------------------------------------------------------------|
| Poales       | Heteropogon | contortus    |                                             | 0          | 0             | 1             | 0               | (Opik et al. 2010)                                             |
| Poales       | Holcus      | lanatus      |                                             | 0          | 0             | 1             | 0               | (Staddon et al. 1999; Opik et al. 2010)                        |
| Poales       | Hordeum     | vulgare      |                                             | 0          | 0             | 1             | 0               | (Opik et al. 2010)                                             |
| Poales       | Juncus      | bulbosus     |                                             | 0          | 0             | 1             | 0               | (Opik et al. 2010)                                             |
| Poales       | Kobresia    | myosuroides  |                                             | 1          | 1             | 0             | 0               | (Mühlmann and Peintner 2008a)                                  |
| Poales       | Leymus      | mollis       | Elymus mollis (Wang and Hsiao 1984)         | 0          | 0             | 1             | 0               | (Kawahara and Ezawa 2013)                                      |
| Poales       | Lolium      | multiflorum  |                                             | 0          | 0             | 1             | 0               | (Börstler et al. 2006)                                         |
| Poales       | Lolium      | perenne      |                                             | 0          | 0             | 1             | 0               | (Opik et al. 2010)                                             |
| Poales       | Megathyrus  | maximus      | Panicum maximum (Simon and Jacobs 2003)     | 0          | 0             | 1             | 0               | (Opik et al. 2010)                                             |
| Poales       | Melinis     | repens       | Rhynchelytrum repens (Duvall et al. 2001)   | 0          | 0             | 1             | 0               | (Opik et al. 2010)                                             |
| Poales       | Miscanthus  | sinensis     |                                             | 0          | 0             | 1             | 0               | (Opik et al. 2010)                                             |
| Poales       | Oloptum     | miliaceum    | Piptatherum miliaceum (Hamasha et al. 2012) | 0          | 0             | 1             | 0               | (Opik et al. 2010)                                             |
| Poales       | Oryza       | sativa       |                                             | 0          | 0             | 1             | 0               | (Rajeshkannan et al. 2009)                                     |
| Poales       | Panicum     | virgatum     |                                             | 0          | 0             | 1             | 0               | (Tomeo and Springer 2012; Moore et al. 2015)                   |
| Poales       | Paspalum    | distichum    |                                             | 0          | 0             | 1             | 0               | (Opik et al. 2010)                                             |
| Poales       | Phalaris    | arundinacea  |                                             | 0          | 0             | 1             | 0               | (Sýkorová et al. 2012)                                         |
| Poales       | Phragmites  | australis    |                                             | 0          | 0             | 1             | 0               | (Opik et al. 2010)                                             |
| Poales       | Poa         | pratensis    |                                             | 0          | 0             | 1             | 0               | (Opik et al. 2010)                                             |
| Poales       | Puccinellia | distans      |                                             | 0          | 0             | 1             | 0               | (Opik et al. 2010)                                             |
| Poales       | Puccinellia | maritima     |                                             | 0          | 0             | 1             | 0               | (Wilde et al. 2009)                                            |
| Poales       | Sesleria    | caerulea     |                                             | 0          | 0             | 1             | 0               | (Opik et al. 2010)                                             |
| Poales       | Setaria     | pumila       |                                             | 0          | 0             | 1             | 0               | (Opik et al. 2010)                                             |
| Poales       | Sorghum     | bicolor      |                                             | 0          | 0             | 1             | 0               | (Opik et al. 2010)                                             |
| Poales       | Triraphis   | mollis       |                                             | 0          | 0             | 1             | 0               | (Opik et al. 2010)                                             |
| Poales       | Trisetum    | flavescens   |                                             | 0          | 0             | 1             | 0               | (Börstler et al. 2006)                                         |
| Poales       | Triticum    | aestivum     |                                             | 0          | 0             | 1             | 0               | (Opik et al. 2010)                                             |
| Poales       | Typha       | angustifolia |                                             | 0          | 0             | 1             | 0               | (Tang et al. 2001)                                             |
| Poales       | Typha       | latifolia    |                                             | 0          | 0             | 1             | 0               | (Ray and Inouye 2006; Calheiros et al. 2014)                   |
| Poales       | Zea         | mays         |                                             | 0          | 0             | 1             | 0               | (Opik et al. 2010; Baraka et al. 2012; Sýkorová et al. 2016)   |
| Poales       | Zoysia      | japonica     |                                             | 0          | 0             | 1             | 0               | (Opik et al. 2010)                                             |
| Ranunculales | Anemone     | patens       | Pulsatilla patens (Kricsfalusy 2015)        | 0          | 0             | 1             | 0               | (Opik et al. 2003; Moora et al. 2004)                          |
| Ranunculales | Caltha      | palustris    |                                             | 0          | 0             | 1             | 0               | (Opik et al. 2010)                                             |
| Ranunculales | Clematis    | vitalba      |                                             | 0          | 0             | 1             | 0               | (Opik et al. 2010)                                             |
| Ranunculales | Ranunculus  | montanus     |                                             | 0          | 0             | 1             | 0               | (Sýkorová et al. 2007b)                                        |
| Ranunculales | Ranunculus  | repens       |                                             | 0          | 0             | 1             | 0               | (Krüger et al. 2009; Kofaczek et al. 2013; Ryszka et al. 2015) |
| Ranunculales | Thalictrum  | minus        |                                             | 0          | 0             | 1             | 0               | (Opik et al. 2010)                                             |
| Rosales      | Cecropia    | obtusa       |                                             | 0          | 0             | 1             | 0               | (Opik et al. 2010)                                             |
| Rosales      | Cercocarpus | ledifolius   |                                             | 1          | 1             | 0             | 0               | (McDonald et al. 2010)                                         |
| Rosales      | Crataegus   | monogyna     |                                             | 0          | 0             | 1             | 0               | (Sýkorová et al. 2016)                                         |
| Rosales      | Dryas       | integrifolia |                                             | 1          | 1             | 0             | 0               | (Timling et al. 2012)                                          |
| Rosales      | Dryas       | octopetala   |                                             | 1          | 1             | 0             | 0               | (Ryberg et al. 2009)                                           |
| Rosales      | Fragaria    | vesca        |                                             | 0          | 0             | 1             | 0               | (Opik et al. 2010)                                             |
| Rosales      | Geum        | rivale       |                                             | 0          | 0             | 1             | 0               | (Opik et al. 2010)                                             |
| Rosales      | Malus       | hupehensis   |                                             | 0          | 0             | 1             | 0               | (Runjin 1989)                                                  |
| Rosales      | Malus       | micromalus   |                                             | 0          | 0             | 1             | 0               | (An et al. 1993)                                               |
| Rosales      | Malus       | sieboldii    |                                             | 0          | 0             | 1             | 0               | (Yoh-ichi Matsubara and Karikomi 1996)                         |
| Rosales      | Pilea       | pumila       |                                             | 0          | 0             | 1             | 0               | (Opik et al. 2010)                                             |
| Rosales      | Potentilla  | erecta       |                                             | 0          | 0             | 1             | 0               | (Börstler et al. 2006)                                         |
| Rosales      | Prunus      | africana     |                                             | 0          | 0             | 1             | 0               | (Opik et al. 2010)                                             |
| Rosales      | Prunus      | persica      |                                             | 0          | 0             | 1             | 0               | (Opik et al. 2010)                                             |

| order                    | genus          | species        | Synonym/subspecies/alternative spelling | Ascomycota | Basidiomycota | Glomeromycota | Mucoromycotina | References                                                 |
|--------------------------|----------------|----------------|-----------------------------------------|------------|---------------|---------------|----------------|------------------------------------------------------------|
| Rosales                  | Pyrus          | pyrifolia      |                                         | 0          | 0             | 1             | 0              | (Yoshimura et al. 2013)                                    |
| Rosales                  | Rosa           | multiflora     |                                         | 0          | 0             | 1             | 0              | (Ahulu et al. 2007)                                        |
| Rosales                  | Rubus          | parvifolius    |                                         | 0          | 0             | 1             | 0              | (Ahulu et al. 2007)                                        |
| Rosales                  | Rubus          | saxatilis      |                                         | 0          | 0             | 1             | 0              | (Opik et al. 2010)                                         |
| Rosales                  | Sorbus         | aucuparia      |                                         | 0          | 0             | 1             | 0              | (Sýkorová et al. 2016)                                     |
| Rosales                  | Ulmus          | americana      |                                         | 1          | 1             | 0             | 0              | (Palmer et al. 2008)                                       |
| Sapindales               | Acer           | macrophyllum   |                                         | 0          | 0             | 1             | 0              | (Helgason et al. 2014)                                     |
| Sapindales               | Acer           | platanoides    |                                         | 0          | 0             | 1             | 0              | (Helgason et al. 2014; Sýkorová et al. 2016)               |
| Sapindales               | Acer           | pseudoplatanus |                                         | 0          | 0             | 1             | 0              | (Opik et al. 2010; Helgason et al. 2014)                   |
| Sapindales               | Cedrela        | odorata        |                                         | 0          | 0             | 1             | 0              | (Shepherd et al. 2007)                                     |
| Sapindales               | Citrus         | maxima         |                                         | 0          | 1             | 1             | 0              | (Youpensuk et al. 2009; Pham et al. 2012)                  |
| Sapindales               | Cneorum        | tricoccon      |                                         | 0          | 0             | 1             | 0              | (Opik et al. 2010)                                         |
| Sapindales               | Dimocarpus     | longan         |                                         | 0          | 1             | 1             | 0              | (Brundett et al. ; Kumla et al. 2012)                      |
| Sapindales               | Dodonaea       | viscosa        |                                         | 0          | 0             | 1             | 0              | (Opik et al. 2010)                                         |
| Sapindales               | Guarea         | pterorhachis   |                                         | 0          | 0             | 1             | 0              | (Opik et al. 2010)                                         |
| Sapindales               | Mangifera      | indica         |                                         | 0          | 1             | 1             | 0              | (Moora et al. 2004; Baraka et al. 2012; Kumla et al. 2012) |
| Sapindales               | Orixa          | japonica       |                                         | 0          | 0             | 1             | 0              | (Opik et al. 2010)                                         |
| Sapindales               | Phellodendron  | amurense       |                                         | 0          | 0             | 1             | 0              | (Opik et al. 2010)                                         |
| Sapindales               | Ruta           | chalepensis    |                                         | 0          | 0             | 1             | 0              | (Opik et al. 2010)                                         |
| Sapindales               | Santiria       | trimera        |                                         | 0          | 0             | 1             | 0              | (Opik et al. 2010)                                         |
| Sapindales               | Swietenia      | macrophylla    |                                         | 0          | 0             | 1             | 0              | (Opik et al. 2010)                                         |
| Sapindales               | Tetragastris   | panamensis     |                                         | 0          | 0             | 1             | 0              | (Opik et al. 2010)                                         |
| Saxifragales             | Saxifraga      | oppositifolia  |                                         | 0          | 0             | 1             | 0              | (Opik et al. 2010)                                         |
| Solanales                | Ipomoea        | pes-caprae     |                                         | 0          | 0             | 1             | 0              | (Opik et al. 2010)                                         |
| Solanales                | Lycium         | barbarum       |                                         | 0          | 0             | 1             | 0              | (Zhang et al. 2010a; Zhang and Tang 2011)                  |
| Solanales                | Montinia       | caryophyllacea |                                         | 0          | 0             | 1             | 0              | (Gazol et al. 2016)                                        |
| Solanales                | Solanum        | tuberosum      |                                         | 0          | 0             | 1             | 0              | (Cesaro et al. 2008)                                       |
| Vitales                  | Vitis          | vinifera       |                                         | 0          | 0             | 1             | 0              | (Opik et al. 2010)                                         |
| Zingiberales             | Musa           | acuminata      |                                         | 0          | 0             | 1             | 0              | (Koffi and Declerck 2015)                                  |
| Zingiberales             | Zingiber       | officinale     |                                         | 0          | 0             | 1             | 0              | (Wang and Qiu 2006; Da Silva et al. 2008)                  |
| Tracheophyta, Gymnosperm |                |                |                                         |            |               |               |                |                                                            |
| Araucariales             | Afrocarpus     | falcatus       | Podocarpus falcatus (Gray 1953)         | 0          | 0             | 1             | 0              | (Wubet et al. 2006)                                        |
| Araucariales             | Araucaria      | angustifolia   |                                         | 0          | 0             | 1             | 0              | (Zandavalli et al. 2004; Moreira et al. 2005)              |
| Araucariales             | Dacrycarpus    | dacrydioides   |                                         | 0          | 0             | 1             | 0              | (Opik et al. 2010)                                         |
| Araucariales             | Podocarpus     | oleifolius     |                                         | 0          | 0             | 1             | 0              | (Opik et al. 2010)                                         |
| Araucariales             | Prumnopitys    | ferruginea     |                                         | 0          | 0             | 1             | 0              | (Opik et al. 2010)                                         |
| Araucariales             | Prumnopitys    | montana        |                                         | 0          | 0             | 1             | 0              | (Kottke and Haug 2004; Haug et al. 2008)                   |
| Araucariales             | Prumnopitys    | taxifolia      |                                         | 0          | 0             | 1             | 0              | (Opik et al. 2010)                                         |
| Cupressales              | Austrocedrus   | chilensis      |                                         | 0          | 0             | 1             | 0              | (Bidartondo et al. 2002)                                   |
| Cupressales              | Chamaecyparis  | obtusa         |                                         | 0          | 0             | 1             | 0              | (Opik et al. 2010)                                         |
| Cupressales              | Sequoiadendron | giganteum      |                                         | 0          | 0             | 1             | 0              | (Opik et al. 2010)                                         |
| Cupressales              | Taxus          | baccata        |                                         | 0          | 1             | 1             | 0              | (Jargeat et al. 2010; Opik et al. 2010)                    |
| Ephedrales               | Ephedra        | fragilis       |                                         | 0          | 0             | 1             | 0              | (Opik et al. 2010)                                         |
| Ginkgoales               | Ginkgo         | biloba         |                                         | 0          | 0             | 1             | 0              | (Fontana 1985)                                             |
| Gnetales                 | Gnetum         | gnemon         |                                         | 0          | 1             | 0             | 0              | (Tedersoo and Põlme 2012)                                  |
| Pinales                  | Abies          | alba           |                                         | 1          | 1             | 0             | 0              | (Rudawska et al. 2016)                                     |
| Pinales                  | Abies          | balsamea       |                                         | 1          | 1             | 0             | 0              | (Kummel and Lostroh 2011)                                  |
| Pinales                  | Abies          | homolepis      |                                         | 1          | 1             | 0             | 0              | (Miyamoto et al. 2014)                                     |
| Pinales                  | Abies          | magnifica      |                                         | 0          | 1             | 0             | 0              | (Bidartondo et al. 2000)                                   |



| order   | genus      | species      | Synonym/subspecies/alternative spelling | Ascomycota | Basidiomycota | Glomeromycota | Mucoromycotina | References                                                                                |
|---------|------------|--------------|-----------------------------------------|------------|---------------|---------------|----------------|-------------------------------------------------------------------------------------------|
| Pinales | Abies      | nordmanniana |                                         | 0          | 1             | 0             | 0              | (Jargeat et al. 2010)                                                                     |
| Pinales | Abies      | religiosa    |                                         | 1          | 1             | 0             | 0              | (Arguelles-Moyao and Garibay-Orijel 2013; Lamus et al. 2015; Argüelles-Moyao et al. 2016) |
| Pinales | Cedrus     | atlantica    |                                         | 0          | 1             | 0             | 0              | (Jargeat et al. 2010)                                                                     |
| Pinales | Cedrus     | deodara      |                                         | 1          | 1             | 0             | 0              | (Dar et al. 2010; Hanif et al. 2012)                                                      |
| Pinales | Keteleeria | davidiana    |                                         | 1          | 1             | 0             | 0              | (Ge et al. 2012)                                                                          |
| Pinales | Larix      | decidua      |                                         | 1          | 1             | 0             | 0              | (Leski and Rudawska 2012)                                                                 |
| Pinales | Larix      | gmelinii     |                                         | 1          | 1             | 0             | 0              | (Fan and Yan 2009)                                                                        |
| Pinales | Larix      | kaempferi    |                                         | 1          | 1             | 0             | 0              | (Miyamoto et al. 2014)                                                                    |
| Pinales | Picea      | abies        |                                         | 1          | 1             | 0             | 0              | (Menkis et al. 2010)                                                                      |
| Pinales | Picea      | crassifolia  |                                         | 1          | 1             | 0             | 0              | (Liyuan and Wang 2011)                                                                    |
| Pinales | Picea      | glauca       |                                         | 1          | 1             | 0             | 0              | (Kernaghan et al. 2003)                                                                   |
| Pinales | Picea      | jezoensis    |                                         | 0          | 1             | 0             | 0              | (Miyamoto et al. 2014)                                                                    |
| Pinales | Picea      | mariana      |                                         | 1          | 1             | 0             | 0              | (Reithmeier and Kernaghan 2013)                                                           |
| Pinales | Picea      | rubens       |                                         | 1          | 0             | 0             | 0              | (Wilcox and Wang 1987)                                                                    |
| Pinales | Picea      | sitchensis   |                                         | 0          | 1             | 0             | 0              | (Carfrae et al. 2006)                                                                     |
| Pinales | Picea      | smithiana    |                                         | 0          | 1             | 0             | 0              | (Niaz et al. 2009)                                                                        |
| Pinales | Pinus      | albicaulis   |                                         | 1          | 1             | 0             | 0              | (Mohatt et al. 2008)                                                                      |
| Pinales | Pinus      | banksiana    |                                         | 1          | 1             | 0             | 0              | (LeDuc et al. 2013)                                                                       |
| Pinales | Pinus      | canariensis  |                                         | 0          | 1             | 0             | 0              | (Hortal et al. 2006)                                                                      |
| Pinales | Pinus      | caribaea     |                                         | 1          | 1             | 0             | 0              | (Vozzo and Hacskaylo 1971; Rivera and Horton 2012)                                        |
| Pinales | Pinus      | cembra       |                                         | 1          | 1             | 0             | 0              | (Rainer et al. 2015)                                                                      |
| Pinales | Pinus      | contorta     |                                         | 1          | 1             | 0             | 1              | (Walker 1985; Byrd et al. 2000; Garcia et al. 2016)                                       |
| Pinales | Pinus      | densiflora   |                                         | 1          | 1             | 0             | 0              | (Wu et al. 1999; Yamada et al. 2001; Ma et al. 2010)                                      |
| Pinales | Pinus      | edulis       |                                         | 1          | 1             | 0             | 0              | (Gehring et al. 1998; Flores-Renteria et al. 2014)                                        |
| Pinales | Pinus      | elliottii    |                                         | 1          | 1             | 0             | 0              | (Lamb and Richards 1970)                                                                  |
| Pinales | Pinus      | halepensis   |                                         | 0          | 1             | 0             | 0              | (Girlanda et al. 2006; Hortal et al. 2006; Rincón et al. 2007)                            |
| Pinales | Pinus      | jeffreyi     |                                         | 0          | 1             | 0             | 0              | (Rusca et al. 2006)                                                                       |
| Pinales | Pinus      | kesiya       |                                         | 1          | 1             | 0             | 0              | (Rao et al. 1997; Ajungla and Sharma 2013)                                                |
| Pinales | Pinus      | koraiensis   |                                         | 1          | 1             | 0             | 0              | (Malysheva et al. 2016)                                                                   |
| Pinales | Pinus      | lambertiana  |                                         | 1          | 1             | 0             | 0              | (Plamboeck et al. 2007)                                                                   |
| Pinales | Pinus      | longaeva     |                                         | 1          | 1             | 0             | 0              | (Bidartondo et al. 2001)                                                                  |
| Pinales | Pinus      | massoniana   |                                         | 1          | 1             | 0             | 0              | (Huang et al. 2012; Huang et al. 2014)                                                    |
| Pinales | Pinus      | montezumae   |                                         | 1          | 1             | 0             | 0              | (Reverchon et al. 2012)                                                                   |
| Pinales | Pinus      | mugo         |                                         | 1          | 1             | 0             | 0              | (Aučina et al. 2011)                                                                      |
| Pinales | Pinus      | muricata     |                                         | 1          | 1             | 0             | 0              | (Horton and Bruns 1998; Horton et al. 1998)                                               |
| Pinales | Pinus      | nigra        |                                         | 1          | 1             | 0             | 0              | (Trocha et al. 2012)                                                                      |
| Pinales | Pinus      | parviflora   |                                         | 0          | 1             | 0             | 0              | (Miyamoto et al. 2014)                                                                    |
| Pinales | Pinus      | patula       |                                         | 1          | 1             | 0             | 0              | (Dames et al. 1999; Hawley et al. 2008)                                                   |
| Pinales | Pinus      | pinaster     |                                         | 1          | 1             | 0             | 0              | (Pera and Alvarez 1995; Girlanda et al. 2006; Hortal et al. 2006)                         |
| Pinales | Pinus      | pineae       |                                         | 1          | 1             | 0             | 0              | (Rincón et al. 1999; Hortal et al. 2006)                                                  |
| Pinales | Pinus      | ponderosa    |                                         | 1          | 1             | 0             | 0              | (Fujimura et al. 2005; Garcia et al. 2016)                                                |
| Pinales | Pinus      | pumila       |                                         | 0          | 1             | 0             | 0              | (Koizumi and Nara 2016)                                                                   |
| Pinales | Pinus      | radiata      |                                         | 1          | 1             | 0             | 0              | (Lamb and Richards 1970; Hortal et al. 2006)                                              |
| Pinales | Pinus      | roxburghii   |                                         | 0          | 1             | 0             | 0              | (Verma and Sudhakara Reddy 2014)                                                          |
| Pinales | Pinus      | sabiniiana   |                                         | 1          | 1             | 0             | 0              | (Smith et al. 2009)                                                                       |
| Pinales | Pinus      | strobus      |                                         | 1          | 1             | 0             | 0              | (Cowden and Peterson 2013)                                                                |
| Pinales | Pinus      | sylvestris   |                                         | 1          | 1             | 0             | 0              | (Girlanda et al. 2006; Hortal et al. 2006; Trocha et al. 2012)                            |
| Pinales | Pinus      | tabuliformis |                                         | 1          | 1             | 0             | 0              | (Long et al. 2016)                                                                        |
| Pinales | Pinus      | taeda        |                                         | 1          | 1             | 0             | 0              | (Lewis and Strain 1996; Burke et al. 2006)                                                |
| Pinales | Pinus      | thunbergii   |                                         | 1          | 1             | 0             | 0              | (Matsuda et al. 2009)                                                                     |

| order                        | genus            | species        | Synonym/subspecies/alternative spelling     | Ascomycota | Basidiomycota | Glomeromycota | Mucoromycotina | References                                                                                |
|------------------------------|------------------|----------------|---------------------------------------------|------------|---------------|---------------|----------------|-------------------------------------------------------------------------------------------|
| Pinales                      | Pinus            | virginiana     |                                             | 1          | 1             | 0             | 0              | (HacsKaylo 1965; Panaccione et al. 2001)                                                  |
| Pinales                      | Pinus            | wallichiana    |                                             | 1          | 1             | 0             | 0              | (Hassan et al. 2007; Dar et al. 2010; Tyub et al. 2014)                                   |
| Pinales                      | Pseudotsuga      | menziesii      |                                             | 1          | 1             | 0             | 0              | (Horton and Bruns 1998; Panaccione et al. 2001; Plamboeck et al. 2007; Twieg et al. 2009) |
| Pinales                      | Tsuga            | canadensis     |                                             | 1          | 1             | 0             | 0              | (Hutchison and Piche 1995; O'Brien et al. 2011; Poznanovic et al. 2014)                   |
| Pinales                      | Tsuga            | mertensiana    |                                             | 1          | 1             | 0             | 0              | (Lorillou and Martin 1995; Panaccione et al. 2001)                                        |
| Tracheophyta, Lycopodiopsida |                  |                |                                             |            |               |               |                |                                                                                           |
| Isoetales                    | Isoetes          | echinospora    |                                             | 0          | 0             | 1             | 1              | (Kohout et al. 2012)                                                                      |
| Isoetales                    | Isoetes          | lacustris      |                                             | 0          | 0             | 1             | 0              | (Kohout et al. 2012)                                                                      |
| Lycopodiales                 | Dendrolycopodium | dendroideum    |                                             | 0          | 0             | 0             | 0              | (Rimington et al. 2015)                                                                   |
| Lycopodiales                 | Diphasiastrum    | alpinum        |                                             | 1          | 1             | 1             | 0              | (Horn et al. 2013)                                                                        |
| Lycopodiales                 | Huperzia         | appressa       |                                             | 0          | 0             | 0             | 0              | (Rimington et al. 2015)                                                                   |
| Lycopodiales                 | Huperzia         | lucidula       |                                             | 0          | 0             | 0             | 0              | (Rimington et al. 2015)                                                                   |
| Lycopodiales                 | Lycopodiella     | inundata       |                                             | 0          | 0             | 0             | 1              | (Rimington et al. 2015)                                                                   |
| Lycopodiales                 | Lycopodiella     | lateralis      |                                             | 0          | 0             | 0             | 1              | (Rimington et al. 2015)                                                                   |
| Lycopodiales                 | Lycopodium       | annotinum      |                                             | 0          | 0             | 0             | 1              | (Rimington et al. 2015)                                                                   |
| Lycopodiales                 | Lycopodium       | clavatum       |                                             | 0          | 0             | 1             | 1              | (Opik et al. 2010; Strullu-Derrien et al. 2014)                                           |
| Lycopodiales                 | Lycopodium       | fastigiatum    |                                             | 0          | 0             | 0             | 1              | (Rimington et al. 2015)                                                                   |
| Lycopodiales                 | Lycopodium       | volubile       |                                             | 0          | 0             | 0             | 0              | (Rimington et al. 2015)                                                                   |
| Lycopodiales                 | Palhinhaea       | cernua         | Lycopodium cernuum (Troia and Greuter 2014) | 0          | 0             | 1             | 0              | (Rimington et al. 2015)                                                                   |
| Lycopodiales                 | Phlegmariurus    | phlegmaria     |                                             | 0          | 0             | 1             | 0              | (Rimington et al. 2015)                                                                   |
| Selaginellales               | Selaginella      | kraussiana     |                                             | 0          | 0             | 1             | 0              | (Rimington et al. 2015)                                                                   |
| Selaginellales               | Selaginella      | selaginoides   |                                             | 0          | 0             | 1             | 0              | (Rimington et al. 2015)                                                                   |
| Tracheophyta, Polypodiopsida |                  |                |                                             |            |               |               |                |                                                                                           |
| Cyatheaales                  | Dicksonia        | squarrosa      |                                             | 0          | 0             | 1             | 0              | (Taylor et al. 2009; Martínez-García et al. 2015)                                         |
| Equisetales                  | Equisetum        | fluviatile     |                                             | 0          | 0             | 0             | 0              | (Wang and Qiu 2006)                                                                       |
| Gleicheniales                | Diplopterygium   | glaucum        |                                             | 0          | 0             | 1             | 0              | (Ogura-Tsujita et al. 2016)                                                               |
| Gleicheniales                | Gleichenia       | microphylla    |                                             | 0          | 0             | 1             | 0              | (Rimington et al. 2015)                                                                   |
| Marattiales                  | Ptisana          | purpurascens   |                                             | 0          | 0             | 1             | 0              | (Rimington et al. 2015)                                                                   |
| Ophioglossales               | Botrychium       | virginianum    |                                             | 0          | 0             | 1             | 0              | (Opik et al. 2010)                                                                        |
| Ophioglossales               | Ophioglossum     | costatum       |                                             | 0          | 0             | 1             | 0              | (Rimington et al. 2015)                                                                   |
| Ophioglossales               | Ophioglossum     | vulgatum       |                                             | 0          | 0             | 1             | 0              | (Rimington et al. 2015)                                                                   |
| Osmundales                   | Osmunda          | regalis        |                                             | 0          | 0             | 1             | 0              | (Opik et al. 2010)                                                                        |
| Polypodiales                 | Anogramma        | leptophylla    |                                             | 0          | 0             | 1             | 1              | (Bidartondo et al. 2011; Rimington et al. 2015)                                           |
| Polypodiales                 | Athyrium         | yokoscense     |                                             | 0          | 0             | 1             | 0              | (Opik et al. 2010)                                                                        |
| Polypodiales                 | Nephrolepis      | hirsutula      |                                             | 0          | 0             | 1             | 0              | (Rimington et al. 2015)                                                                   |
| Polypodiales                 | Polystichum      | acrostichoides |                                             | 0          | 0             | 1             | 0              | (Opik et al. 2010)                                                                        |
| Polypodiales                 | Triplophyllum    | vogelii        |                                             | 0          | 0             | 1             | 0              | (Opik et al. 2010)                                                                        |
| Psilotales                   | Marsilea         | crenata        |                                             | 0          | 0             | 0             | 0              | (Kai and Zhiwei 2006)                                                                     |
| Psilotales                   | Psilotum         | nudum          |                                             | 0          | 0             | 1             | 0              | (Opik et al. 2010; Rimington et al. 2015)                                                 |
| Psilotales                   | Tmesipteris      | elongata       |                                             | 0          | 0             | 1             | 0              | (Rimington et al. 2015)                                                                   |
| Psilotales                   | Tmesipteris      | tannensis      |                                             | 0          | 0             | 1             | 0              | (Opik et al. 2010; Bidartondo et al. 2011)                                                |

(?), H. 2011. Community structure of indigenous arbuscular mycorrhizal fungi in the colonized roots of various winter crops (Genbank accession: AB548565; AB548544; AB548543; AB548542; AB548541-AB548565; AB548544; AB548543; AB548542; AB548541).

- Abadie, J.-C., Ü. Püttsepp, G. Gebauer, A. Faccio, P. Bonfante, and M.-A. Selosse. 2006. *Cephalanthera longifolia* (Neottieae, Orchidaceae) is mixotrophic: a comparative study between green and nonphotosynthetic individuals. *Canadian Journal of Botany* 84:1462-1477.
- Aggangan, N. S., H. K. Moon, and S. H. Han. 2010. Growth response of *Acacia mangium* Willd. seedlings to arbuscular mycorrhizal fungi and four isolates of the ectomycorrhizal fungus *Pisolithus tinctorius* (Pers.) Coker and Couch. *New Forests* 39:215-230.
- Ahulu, E. M., H. Andoh, and M. Nonaka. 2007. Host-related variability in arbuscular mycorrhizal fungal structures in roots of *Hedera rhombea*, *Rubus parvifolius*, and *Rosa multiflora* under controlled conditions. *Mycorrhiza* 17:93-101.
- Ajungla, T. and G. D. Sharma. 2013. Neutralization of heavy metals toxicity by *Cenococcum graniforme* in the establishment and survival of *Pinus kesiya* (Royle ex Gordon) seedlings. *International Journal of life sciences Biotechnology and Pharma Research* 2:279-283.
- Allen, T. R., T. Millar, S. M. Berch, and M. L. Berbee. 2003. Culturing and direct DNA extraction find different fungi from the same ericoid mycorrhizal roots. *New Phytol* 160:255-272.
- An, Z. Q., T. Shen, and H. G. Wang. 1993. Mycorrhizal fungi in relation to growth and mineral nutrition of apple seedlings. *Scientia Horticulturae* 54:275-285.
- Ancora, G. 1986. Globe Artichoke (*Cynara scolymus* L.). Pp. 471-519 in Y. P. S. Bajaj, ed. *Crops I*. Springer Berlin Heidelberg, Berlin, Heidelberg.
- Arguelles-Moyao, A. and R. Garibay-Orijel. 2013. Ectomycorrhizal fungi from a monodominant *Abies religiosa* forest in neotropical Mexico.
- Argüelles-Moyao, A., R. Garibay-Orijel, L. M. Márquez-Valdelamar, and E. Arellano-Torres. 2016. *Clavulina-Membranomyces* is the most important lineage within the highly diverse ectomycorrhizal fungal community of *Abies religiosa*. *Mycorrhiza*:1-13.
- Aučina, A., M. Rudawska, T. Leski, D. Ryliškis, M. Pietras, and E. Riepšas. 2011. Ectomycorrhizal fungal communities on seedlings and conspecific trees of *Pinus mugo* grown on the coastal dunes of the Curonian Spit in Lithuania. *Mycorrhiza* 21:237-245.
- Bakalin, V. 2011. Notes on Lophozia VI. Taxonomy and distribution of Lophozia and Schistochilopsis (Lophoziaceae) in North America north of Mexico. *The Bryologist* 114:298-315.
- Bakalin, V. A., K. Tigishvili, and G. Arutinov. 2016. A new checklist of the liverworts and hornworts of Georgia (Caucasus). *Botanica Pacifica* 5:69-78.
- Baraka, M. A., E.-s. M. Ramadan, and A. F. Mohamed. 2012. Biodiversity and Classification of Arbuscular Mycorrhizal Fungi ( Glomales ) in Ismailia Governorate. 12:83-90.
- Barker, W. R., G. L. Nesom, P. M. Beardsley, and N. S. Fraga. 2012. A TAXONOMIC CONSPECTUS OF PHRYMACEAE: A NARROWED CIRCUMSCRIPTION FOR MIMULUS, NEW AND RESURRECTED GENERA, AND NEW NAMES AND COMBINATIONS.
- Bateman, R. M., P. J. Rudall, M. I. Bidartondo, S. Cozzolino, V. Tranchida-Lombardo, M. A. Carine, and M. Moura. 2014. Speciation via floral heterochrony and presumed mycorrhizal host switching of endemic butterfly orchids on the Azorean archipelago. *American Journal of Botany* 101:979-1001.
- Bauman, J. M., C. H. Keiffer, S. Hiremath, and B. C. McCarthy. 2013. Soil preparation methods promoting ectomycorrhizal colonization and American chestnut *Castanea dentata* establishment in coal mine restoration. *Journal of Applied Ecology* 50:721-729.
- Bedini, S., A. Turrini, C. Rigo, E. Argese, and M. Giovannetti. 2010. Molecular characterization and glomalgin production of arbuscular mycorrhizal fungi colonizing a heavy metal polluted ash disposal island, downtown Venice. *Soil Biology and Biochemistry* 42:758-765.
- Benucci, G. M. N., L. Raggi, E. Albertini, T. Grebenc, M. Bencivenga, M. Falcinelli, and G. Di Massimo. 2011. Ectomycorrhizal communities in a productive *Tuber aestivum* Vittad. orchard: Composition, host influence and species replacement. *FEMS Microbiology Ecology* 76:170-184.

- Bidartondo, M. I., J. Baar, and T. D. Bruns. 2001. Low ectomycorrhizal inoculum potential and diversity from soils in and near ancient forests of bristlecone pine (*Pinus longaeva*). *Canadian Journal of Botany* 79:293-299.
- Bidartondo, M. I., T. D. Bruns, M. Weiss, C. Sérgio, and D. J. Read. 2003. Specialized cheating of the ectomycorrhizal symbiosis by an epiparasitic liverwort. *Proceedings of the Royal Society B: Biological Sciences* 270:835-842.
- Bidartondo, M. I., B. Burghardt, G. Gebauer, T. D. Bruns, and D. J. Read. 2004. Changing partners in the dark: isotopic and molecular evidence of ectomycorrhizal liaisons between forest orchids and trees. *Proceedings. Biological sciences / The Royal Society* 271:1799-1806.
- Bidartondo, M. I. and J. G. Duckett. 2010. Conservative ecological and evolutionary patterns in liverwort-fungal symbioses. *Proceedings. Biological sciences / The Royal Society* 277:485-492.
- Bidartondo, M. I., A. Kretzer, E. Pine, and T. D. Bruns. 2000. High root concentration and uneven ectomycorrhizal diversity near *Sarcodes sanguinea* (Ericaceae): a cheater that stimulates its victims? *American Journal of Botany* 87:1783-1788.
- Bidartondo, M. I. and D. J. Read. 2008. Fungal specificity bottlenecks during orchid germination and development. *Mol Ecol* 17:3707-3716.
- Bidartondo, M. I., D. J. Read, J. M. Trappe, V. Merckx, R. Ligrone, and J. G. Duckett. 2011. The dawn of symbiosis between plants and fungi. *Biol Letters* 7:574-577.
- Bidartondo, M. I., D. Redecker, I. Hijri, A. Se, A. Wiemken, T. D. Bruns, L. Domí, J. R. Leake, and D. J. Read. 2002. Epiparasitic plants specialized on arbuscular mycorrhizal fungi. *Nature* 419:389-392.
- Blaalid, R. 2012. Back to the roots : root-associated fungi explored by high throughput sequencing.
- Bongard, C. L. 2013. Molecular Characterization of Endophytic Fungal Colonizers of Plant Roots: A Comparison between the Aggressive Invasives *Vincetoxicum rossicum*, *Alliaria petiolata*, and Local Native Plant Species.
- Bonito, G., T. Brenneman, and R. Vilgalys. 2011. Ectomycorrhizal fungal diversity in orchards of cultivated pecan (*Carya illinoensis*; Juglandaceae). *Mycorrhiza* 21:601-612.
- Bonito, G., H. Reynolds, M. S. Robeson, J. Nelson, B. P. Hodkinson, G. Tuskan, C. W. Schadt, and R. Vilgalys. 2014. Plant host and soil origin influence fungal and bacterial assemblages in the roots of woody plants. *Mol Ecol* 23:3356-3370.
- Bonnardeaux, Y., M. Brundrett, A. Batty, K. Dixon, J. Koch, and K. Sivasithamparam. 2007. Diversity of mycorrhizal fungi of terrestrial orchids: compatibility webs, brief encounters, lasting relationships and alien invasions. *Mycological Research* 111:51-61.
- Borriello, R., A. Berruti, E. Lumini, M. T. Della Beffa, V. Scariot, and V. Bianciotto. 2015. Edaphic factors trigger diverse AM fungal communities associated to exotic camellias in closely located Lake Maggiore (Italy) sites. *Mycorrhiza* 25:253-265.
- Börstler, B., C. Renker, A. Kahmen, and F. Buscot. 2006. Species composition of arbuscular mycorrhizal fungi in two mountain meadows with differing management types and levels of plant biodiversity. *Biology and Fertility of Soils* 42:286-298.
- Bratek, Z., E. Jakucs, K. Bóka, and G. Szedlay. 1996. Mycorrhizae between black locust (*Robinia pseudoacacia*) and *Terfezia terfezioides*. *Mycorrhiza* 6:271-274.
- Brevik, A., J. Moreno-Garcia, and J. Wenelczyk. 2010. Diversity of fungi associated with *Bistorta vivipara* (L.) Delarbre root systems along a local chronosequence on Svalbard. *Agarica* 29:15-26.
- Brundett, M., B. Dell, N. Malajczuk, and G. Mingqi. Mycorrhizas for Plantation Forestry in Asia. Pp. 146-146 *in* M. Brundett, B. Dell, N. Malajczuk, and G. Mingqi, eds, Kaiping, Guangdong Province, P.R. China.

- Brundrett, M. C. 2009. Mycorrhizal associations and other means of nutrition of vascular plants: Understanding the global diversity of host plants by resolving conflicting information and developing reliable means of diagnosis. *Plant Soil* 320:37-77.
- Burke, D. J., K. J. Martin, P. T. Rygielwicz, and M. A. Topa. 2006. Relative abundance of ectomycorrhizas in a managed loblolly pine (*Pinus taeda*) genetics plantation as determined through terminal restriction fragment length polymorphism profiles. *Can J Bot* 84:924-932.
- Busby, R. R., M. E. Stromberger, G. Rodriguez, D. L. Gebhart, and M. W. Paschke. 2013. Arbuscular mycorrhizal fungal community differs between a coexisting native shrub and introduced annual grass. *Mycorrhiza* 23:129-141.
- Byrd, K. B., V. T. Parker, D. R. Vogler, and K. W. Cullings. 2000. The influence of clear-cutting on ectomycorrhizal fungus diversity in a lodgepole pine (*Pinus contorta*) stand, Yellowstone National Park, Wyoming, and Gallatin National Forest, Montana. *Canadian Journal of Botany* 78:149-156.
- Calheiros, C., A. Franco, and P. Castro. 2014. Study on the dynamics of microbial communities in a constructed wetland inhabited by different plant species with focus on arbuscular mycorrhizal fungi (Genbank accession: KJ639003 KJ639005 KJ639006 KJ639008 KJ639009).
- Campagnac, E., J. Fontaine, A. L. H. Sahraoui, F. Laruelle, R. Durand, and A. Grandmougin-Ferjani. 2008. Differential effects of fenpropimorph and fenhexamid, two sterol biosynthesis inhibitor fungicides, on arbuscular mycorrhizal development and sterol metabolism in carrot roots. *Phytochemistry* 69:2912-2919.
- Carfrae, J. A., K. R. Skene, L. J. Sheppard, K. Ingleby, and A. Crossley. 2006. Effects of nitrogen with and without acidified sulphur on an ectomycorrhizal community in a Sitka spruce (*Picea sitchensis* Bong. Carr) forest. *Environ Pollut* 141:131-138.
- Cesaro, P., D. Van Tuinen, A. Copetta, O. Chatagnier, G. Berta, S. Gianinazzi, and G. Lingua. 2008. Preferential colonization of *Solanum tuberosum* L. Roots by the fungus *Glomus intraradices* in arable soil of a potato farming area. *Appl Environ Microb* 74:5776-5783.
- Chaiyasen, A., J. P. W. Young, N. Teamroong, P. Gavinlertvatana, and S. Lumyong. 2014. Characterization of arbuscular mycorrhizal fungus communities of *aquilaria crassna* and *tectona grandis* roots and soils in thailand plantations. *Plos One* 9.
- Chambers, S. M., N. J. A. Curlevski, and J. W. G. Cairney. 2008. Ericoid mycorrhizal fungi are common root inhabitants of non-Ericaceae plants in a south-eastern Australian sclerophyll forest. *FEMS Microbiology Ecology* 65:263-270.
- Chatarpaul, L., P. Chakravarty, and P. Subramaniam. 1989. Studies in tetrapartite symbioses - I. Role of ecto- and endomycorrhizal fungi and *Frankia* on the growth performance of *Alnus incana*. *Plant Soil* 118:145-150.
- Chen, J., H. Wang, and S. X. Guo. 2012. Isolation and identification of endophytic and mycorrhizal fungi from seeds and roots of *Dendrobium* (Orchidaceae). *Mycorrhiza* 22:297-307.
- Chen, L., D. Zhang, W. Yang, Y. Liu, L. Zhang, and S. Gao. 2016a. Sex-specific responses of *Populus deltoides* to *Glomus intraradices* colonization and Cd pollution. *Chemosphere* 155:196-206.
- Chen, S., Y. Xing, T. Wang, Q. Zhang, W. Yu, K. Fang, A. E. Newhouse, L. D. McGuigan, K. R. Stewart, C. A. Maynard, W. A. Powell, L. Qin, and Q. Cao. 2016b. Ectomycorrhizae symbiosis in *Castanea mollissima* improves phosphate acquisition through activating gene expression and H<sup>+</sup> efflux. *Scientia Horticulturae* 210:99-107.
- Cicatelli, A., G. Lingua, V. Todeschini, S. Biondi, P. Torrigiani, and S. Castiglione. 2010. Arbuscular mycorrhizal fungi restore normal growth in a white poplar clone grown on heavy metal-contaminated soil, and this is associated with upregulation of foliar metallothionein and polyamine biosynthetic gene expression. *Annals of Botany* 106:791-802.

- Coburn, J. 2003. The effects of selective cutting and liming on mushroom formation and mycorrhizal colonization of mature yellow birch (*Betula alleghaniensis* Britt.) in a deciduous forest within the Reserve faunique de Portneuf, south central Quebec.
- Cowden, C. C. and C. J. Peterson. 2013. Annual and seasonal dynamics of ectomycorrhizal fungi colonizing white pine (*Pinus strobus*) seedlings following catastrophic windthrow in northern Georgia, USA. *Canadian Journal of Forest Research* 43:215-223.
- Crandall-Stotler, B. J., R. E. Stotler, W. T. Doyle, and L. L. Forrest. 2008. Chapter Nineteen: *Phaeoceros proskaueri* sp. nov., a New Species of the *Phaeoceros hallii* (Austin) Prosk.-*Phaeoceros pearsonii* (M. Howe) Prosk. Complex and the Systematic Affinities of *Paraphymatoceros* Häs. *Fieldiana Botany* 47:213-238.
- D'Amico, K. M., T. R. Horton, C. A. Maynard, S. V. Stehman, A. D. Oakes, and W. A. Powell. 2015. Comparisons of Ectomycorrhizal Colonization of Transgenic American Chestnut with Those of the Wild Type, a Conventionally Bred Hybrid, and Related Fagaceae Species. *Appl Environ Microb* 81:100-108.
- D'Souza, J. and B. F. Rodrigues. 2013. Biodiversity of Arbuscular Mycorrhizal (AM) fungi in mangroves of Goa in West India. *Journal of Forestry Research* 24:515-523.
- Da Silva, M. F., R. Pescador, R. A. Rebelo, and S. L. Stürmer. 2008. The effect of arbuscular mycorrhizal fungal isolates on the development and oleoresin production of micropropagated *Zingiber officinale*. *Brazilian Journal of Plant Physiology* 20:119-130.
- Dames, J. F., C. J. Straker, and M. C. Scholes. 1999. Ecological and anatomical characterization of some *Pinus patula* ectomycorrhizas from Mpumalanga, South Africa. *Mycorrhiza* 9:9-24.
- Dar, G. H., M. A. Beig, and N. A. Ganai. 2010. Influence of Ectomycorrhizal Inoculation on Blue Pine (*Pinus wallichiana*) and Deodar (*Cedrus deodara*) Seedlings. *Trends in Biosciences* 3:60-62.
- Davison, J., M. Moora, M. Öpik, A. Adholeya, L. Ainsaar, A. Bâ, S. Burla, a. G. Diedhiou, I. Hiiesalu, T. Jairus, N. C. Johnson, A. Kane, K. Koorem, M. Kochar, C. Ndiaye, M. Pärtel, Ü. Reier, Ü. Saks, R. Singh, M. Vasar, and M. Zobel. 2015. Global assessment of arbuscular mycorrhizal fungus diversity reveals very low endemism. *Science* 127:970-973.
- De Beenhouwer, M., M. Van Geel, T. Ceulemans, D. Muleta, B. Lievens, and O. Honnay. 2015. Changing soil characteristics alter the arbuscular mycorrhizal fungi communities of *Arabica* coffee (*Coffea arabica*) in Ethiopia across a management intensity gradient. *Soil Biology and Biochemistry* 91:133-139.
- Del Fabbro, C. and D. Prati. 2014. Early responses of wild plant seedlings to arbuscular mycorrhizal fungi and pathogens. *Basic and Applied Ecology* 15:534-542.
- Desirò, A., J. G. Duckett, S. Pressel, J. C. Villarreal, and M. I. Bidartondo. 2013. Fungal symbioses in hornworts: a chequered history. *Proceedings of the Royal Society of London B: Biological Sciences* 280:20130207-20130207.
- Dickie, I. A., R. T. Koide, and A. C. Fayish. 2001. Vesicular-arbuscular mycorrhizal infection of *Quercus rubra* seedlings. *New Phytol* 151:257-264.
- Diédhiou, A. G., A. M. Bâ, S. N. Sylla, B. Dreyfus, M. Neyra, and I. Ndoye. 2004. The early-stage ectomycorrhizal *Theleporoid* fungal sp. is competitive and effective on *Azelia africana* Sm. in nursery conditions in Senegal. *Mycorrhiza* 14:313-322.
- Dolcet-Sanjuan, R., E. Claveria, A. Camprubí, V. Estaún, and C. Calvet. 1996. Micropropagation of walnut trees (*Juglans regia* L) and response to arbuscular mycorrhizal inoculation. *Agronomie* 16:639-645.
- Duckett, J. G. and D. J. Read. 1991. The Use of the Fluorescent Dye, 3,3'-Dihexyloxycarbocyanine Iodide, for Selective Staining of Ascomycete Fungi Associated With Liverwort Rhizoids and Ericoid Mycorrhizal Roots. *New Phytol* 118:259-272.

- Duckett, J. G., J. Russell, and R. Ligrone. 2006. Basidiomycetous endophytes in jungermannialean (leafy) liverworts have novel cytology and species-specific host ranges: a cytological and experimental study. *Canadian Journal of Botany* 84:1075-1093.
- Duclos, J. L., R. Pepin, and G. Bruchet. 1982. Étude morphologique, anatomique et ultrastructurale d'endomycorhizes synthétiques d' *Erica carnea*. *Canadian Journal of Botany* 61:466-475.
- Duff, R. J., J. C. Villarreal, D. C. Caagill, and K. S. Renzaglia. 2007. Progress and challenges toward developing a phylogeny and classification of the hornworts. *Bryologist* 110:214-243.
- Duvall, M. R., J. D. Noll, and A. H. Minn. 2001. Phylogenetics of paniceae (poaceae). *Am J Bot* 88:1988-1992.
- Egerton-Warburton, L. and M. F. Allen. 2001. Endo- and ectomycorrhizas in *Quercus agrifolia* Nee. (Fagaceae): Patterns of root colonization and effects on seedling growth. *Mycorrhiza* 11:283-290.
- Eiten, G. 1963. Taxonomy and Regional Variation of *Oxalis* Section *Corniculatae*. I. Introduction, Keys and Synopsis of the Species. *The American Midland Naturalist* 6 pp. 257-309.
- Ercole, E., M. Adamo, M. Rodda, G. Gebauer, M. Girlanda, and S. Perotto. 2015. Temporal variation in mycorrhizal diversity and carbon and nitrogen stable isotope abundance in the wintergreen meadow orchid *Anacamptis morio*. *New Phytol* 205:1308-1319.
- Ercole, E., M. Rodda, M. Molinatti, S. Voyron, S. Perotto, and M. Girlanda. 2013. Cryopreservation of orchid mycorrhizal fungi: a tool for the conservation of endangered species. *Journal of microbiological methods* 93:134-137.
- Erős-Honti, Z., G. M. Kovács, G. Szedlay, and E. Jakucs. 2008. Morphological and molecular characterization of *Humaria* and *Genea* ectomycorrhizae from Hungarian deciduous forests. *Mycorrhiza* 18:133-143.
- Evans, A. W. 1913. Notes on North American Hepaticae. IV. *The Bryologist* 16:49-55.
- Fan, Y. and W. Yan. 2009. Some of trees root tip ectomycorrhizal fungus sequence from inner Mongolia in China. Pp. FJ803950 & FJ803944-FJ803950 & FJ803944.
- Ferrer-Gallego, P. P. and G. Mateo. 2015. Typification of *Hieracium pilosella* L. (Asteraceae). *Annales Botanici Fennici* 52:202-204.
- Fini, A., P. Frangi, G. Amoroso, R. Piatti, M. Faoro, C. Bellasio, and F. Ferrini. 2011. Effect of controlled inoculation with specific mycorrhizal fungi from the urban environment on growth and physiology of containerized shade tree species growing under different water regimes. *Mycorrhiza* 21:703-719.
- Flores-Renteria, L., M. K. Lau, L. J. Lamit, and C. Gehring. 2014. An elusive ectomycorrhizal fungus reveals itself: a new species of *Geopora* (Pyronemataceae) associated with *Pinus edulis*. *Mycologia* 106:13-263-.
- Fontana, A. 1985. Vesicular-Arbuscular Mycorrhizas of *Ginkgo Biloba* L. in Natural and Controlled Conditions. Pp. 441-447.
- Fujimura, K. E., J. E. Smith, T. R. Horton, N. S. Weber, and J. W. Spatafora. 2005. Pezizalean mycorrhizas and sporocarps in ponderosa pine (*Pinus ponderosa*) after prescribed fires in eastern Oregon, USA. *Mycorrhiza* 15:79-86.
- Fuselier, L. C., B. Shaw, J. J. Engel, M. von Konrat, D. P. Costa, N. Devos, and A. J. Shaw. 2011. The status and phylogeography of the liverwort genus *Apometzgeria* Kuwah. (Metzgeriaceae). *The Bryologist* 114:92-101.
- Garay-Serrano, E., V. M. Bandala, and L. Montoya. 2012. Morphological and molecular identification of the ectomycorrhizal association of *Lactarius fumosibrunneus* and *Fagus grandifolia* var. *mexicana* trees in eastern Mexico. *Mycorrhiza* 22:583-588.

- Garcia, M. O., J. E. Smith, D. L. Luoma, and M. D. Jones. 2016. Ectomycorrhizal communities of ponderosa pine and lodgepole pine in the south-central Oregon pumice zone. *Mycorrhiza* 26:275-286.
- Garnica, S., K. Riess, R. Bauer, F. Oberwinkler, and M. Weiß. 2013. Phylogenetic diversity and structure of sebacinoid fungi associated with plant communities along an altitudinal gradient. *FEMS Microbiology Ecology* 83:265-278.
- Gazol, A., M. Zobel, J. J. Cantero, J. Davison, K. J. Esler, T. Jairus, M. Öpik, M. Vasar, and M. Moora. 2016. Impact of alien pines on local arbuscular mycorrhizal fungal communities—evidence from two continents. *FEMS Microbiology Ecology* 92:fiw073-fiw073.
- Ge, Z. W., M. E. Smith, Q. Y. Zhang, and Z. L. Yang. 2012. Two species of the Asian endemic genus *Keteleeria* form ectomycorrhizas with diverse fungal symbionts in southwestern China. *Mycorrhiza* 22:403-408.
- Gebauer, G., K. Preiss, and A. C. Gebauer. 2016. Partial mycoheterotrophy is more widespread among orchids than previously assumed. *New Phytol* 211:11-15.
- Gehring, C. A., T. C. Theimer, T. G. Whitham, and P. Keim. 1998. Ectomycorrhizal fungal community structure of pinyon pines growing in two environmental extremes. *Ecology* 79:1562-1572.
- Giomaro, G., D. Sisti, A. Zambonelli, A. Amicucci, M. Cecchini, O. Comandini, and V. Stocchi. 2002. Comparative study and molecular characterization of ectomycorrhizas in *Tilia americana* and *Quercus pubescens* with *Tuber brumale*. *Fems Microbiol Lett* 216:9-14.
- Girlanda, M., R. Segreto, D. Cafasso, H. T. Liebel, M. Rodda, E. Ercole, S. Cozzolino, G. Gebauer, and S. Perotto. 2011. Photosynthetic Mediterranean meadow orchids feature partial mycoheterotrophy and specific mycorrhizal associations1. *American Journal of Botany* 98:1148-1163.
- Girlanda, M., M. A. Selosse, D. Cafasso, F. Brilli, S. Delfine, R. Fabbian, S. Ghignone, P. Pinelli, R. Segreto, F. Loreto, S. Cozzolino, and S. Perotto. 2006. Inefficient photosynthesis in the Mediterranean orchid *Limodorum abortivum* is mirrored by specific association to ectomycorrhizal Russulaceae. *Mol Ecol* 15:491-504.
- Glen, M., I. C. Tommerup, N. L. Bougher, and P. A. O'Brien. 2002. Are Sebacinaceae common and widespread ectomycorrhizal associates of *Eucalyptus* species in Australian forests? *Mycorrhiza* 12:243-247.
- Gray, N. E. 1953. A taxonomic revision of *Podocarpus*: VII. The African species of *Podocarpus*: section *Afrocarpus*. *Journal of the Arnold Arboretum* 34:67-76.
- Grose, S. O. and R. G. Olmstead. 2007. Taxonomic revisions in the polyphyletic genus *Tabebuia* s. l. (Bignoniaceae). *Systematic Botany* 32:660-670.
- Grubisha, L. C., N. Levens, M. S. Olson, and D. Lee Taylor. 2012. Intercontinental divergence in the *Populus*-associated ectomycorrhizal fungus, *Tricholoma populinum*. *New Phytol* 194:548-560.
- Grunewaldt-Stöcker, G., C. v. d. Berg, J. Knopp, and H. v. Alten. 2013. Interactions of ericoid mycorrhizal fungi and root pathogens in *Rhododendron*: <I>In vitro</I> tests with plantlets in sterile liquid culture. *Plant Root* 7:33-48.
- Gryta, H., F. Carriconde, J. Y. Charcosset, P. Jargeat, and M. Gardes. 2006. Population dynamics of the ectomycorrhizal fungal species *Tricholoma populinum* and *Tricholoma scalpturatum* associated with black poplar under differing environmental conditions. *Environ Microbiol* 8:773-786.
- Gupta, N., U. C. Basak, and P. Das. 2002. Arbuscular mycorrhizal association of mangroves in saline and non-saline soils. *Mycorrhiza News* 13:14-19.
- Hacskaylo, E. 1965. *Thelephora terrestris* and mycorrhizae of Virginia pine. *Forest Science* 11:401-404.
- Hamasha, H. R., K. B. von Hagen, and M. Roser. 2012. *Stipa* (Poaceae) and allies in the Old World: molecular phylogenetics realigns genus circumscription and gives evidence on the origin of American and Australian lineages. *Plant Syst Evol* 298:351-367.



- Hanif, M., A. N. Khalid, and S. Sarwer. 2012. Additions to the ectomycorrhizae associated with Himalayan cedar (*Cedrus deodara*) using rDNA-ITS. *International Journal of Agriculture and Biology* 14:101-106.
- Harley, J. L. and E. L. Harley. 1987. A check-list of mycorrhizae in the british flora. *New Phytology* 105:1-102.
- Harmaja, H. 1991. Taxonomic notes on *Rhododendron* subsection *Ledum* (*Ledum*, Ericaceae), with a key to its species. Pp. 171-173. *Annales Botanici Fennici*. JSTOR.
- Hashimoto, Y. and M. Hyakumachi. 2000. Quantities and types of ectomycorrhizal and endophytic fungi associated with *Betula platyphylla* var. *japonica* seedlings during the initial stage of establishment of vegetation after disturbance. *Ecological Research* 15:21-31.
- Hassan, D. G., B. M. A, G. N. A, and Q. N. A. 2007. Effect of source and inoculum load of ectomycorrhizae on the growth and biomass of containerized kail pine (*Pinus wallichiana*) seedlings. *Applied Biological Research* 9:19-28.
- Haug, I., F. Oberwinkler, and I. Kottke. 2008. Distinctive communities of Glomeromycota in a neotropical mountain rain forest and a neighboring afforestation site in southern Ecuador (Genbank accession: EU152145; EU152144 ).
- Haug, I., T. Wubet, M. Weiß, N. Aguirre, M. Weber, S. Günter, and I. Kottke. 2010. Species-rich but distinct arbuscular mycorrhizal communities in reforestation plots on degraded pastures and in neighboring pristine tropical mountain rain forest. *Tropical Ecology* 51:125-148.
- Hawley, G. L., A. F. S. Taylor, and J. F. Dames. 2008. Ectomycorrhizas in association with *Pinus patula* in Sabie, South Africa. *South African Journal of Science* 104:273-283.
- Hayward, J. and T. R. Horton. 2014. Phylogenetic trait conservation in the partner choice of a group of ectomycorrhizal trees. *Mol Ecol* 23:4886-4898.
- Healy, R. A., M. E. Smith, G. M. Bonito, D. H. Pfister, Z. W. Ge, G. G. Guevara, G. Williams, K. Stafford, L. Kumar, T. Lee, C. Hobart, J. Trappe, R. Vilgalys, and D. J. McLaughlin. 2012. High diversity and widespread occurrence of mitotic spore mats in ectomycorrhizal Pezizales. *Mol Ecol* 22:1717-1732.
- Healy, R. A., H. Zurier, G. Bonito, M. E. Smith, and D. H. Pfister. 2016. Mycorrhizal detection of native and non-native truffles in a historic arboretum and the discovery of a new North American species, *Tuber arnoldianum* sp. nov. *Mycorrhiza*:1-12.
- Heenan, P. B. and R. D. Smitsen. 2013. Revised circumscription of *Nothofagus* and recognition of the segregate genera *Fuscospora*, *Lophozonia*, and *Trisyngyne* (*Nothofagaceae*). *Phytotaxa* 146:1-1.
- Helgason, T., H. Feng, D. J. Sherlock, J. P. W. Young, and A. H. Fitter. 2014. Arbuscular mycorrhizal communities associated with maples (*Acer* spp .) in a common garden are influenced by season and host plant. *Botany* 326:321-326.
- Horn, K., T. Franke, M. Unterseher, M. Schnittler, and L. Beenken. 2013. Morphological and molecular analyses of fungal endophytes of achlorophyllous gametophytes of *Diphasiastrum alpinum* (*Lycopodiaceae*). *American Journal of Botany* 100:2158-2174.
- Hortal, S., J. Pera, L. Galipienso, and J. Paradé. 2006. Molecular identification of the edible ectomycorrhizal fungus *Lactarius deliciosus* in the symbiotic and extraradical mycelium stages. *J Biotechnol* 126:123-134.
- Horton, T. R. and T. D. Bruns. 1998. Multiple-host fungi are the most frequent and abundant ectomycorrhizal types in a mixed stand of Douglas fir (*Pseudotsuga menziesii*) and bishop pine (*Pinus muricata*). *New Phytol* 139:331-339.
- Horton, T. R., E. Cázares, and T. D. Bruns. 1998. Ectomycorrhizal, vesicular-arbuscular and dark septate fungal colonization of bishop pine (*Pinus muricata*) seedlings in the first 5 months of growth after wildfire. *Mycorrhiza* 8:11-18.

- Hryniewicz, K., C. Baum, and P. Leinweber. 2009. Mycorrhizal community structure, microbial biomass P and phosphatase activities under *Salix polaris* as influenced by nutrient availability. *European Journal of Soil Biology* 45:168-175.
- Huang, J., K. Nara, C. Lian, K. Zong, K. Peng, S. Xue, and Z. Shen. 2012. Ectomycorrhizal fungal communities associated with Masson pine (*Pinus massoniana* Lamb.) in Pb-Zn mine sites of central south China. *Mycorrhiza* 22:589-602.
- Huang, J., K. Nara, K. Zong, J. Wang, S. Xue, K. Peng, Z. Shen, and C. Lian. 2014. Ectomycorrhizal fungal communities associated with Masson pine (*Pinus massoniana*) and white oak (*Quercus fabri*) in a manganese mining region in Hunan Province, China. *Fungal Ecology* 9:1-10.
- Hutchison, L. J. and Y. Piche. 1995. Effects Of Exogenous Glucose On Mycorrhizal Colonization In-Vitro By Early-Stage And Late-Stage Ectomycorrhizal Fungi. *Can J Bot* 73:898-904.
- Ilyes, Z., K. Halász, S. Rudnóy, N. Ouanphanivanh, T. Garay, and Z. Bratek. 2009. Changes in the diversity of the mycorrhizal fungi of orchids as a function of the water supply of the habitat. *Journal of Applied Botany and Food Quality* 83:28-36.
- Ilyas, S. 2013. Molecular investigations to characterize ectomycorrhizal fungal communities associated with some deciduous trees of Galyat, Pakistan.
- Ilyas, S., A. Razaq, and A. N. Khalid. 2013. Molecular Investigations to Determine the Ectomycorrhizal Habit of *Lactarius sanguifluus* Associated with Coniferous and Deciduous Vegetation of Galyat, Khyber Pakhtunkhwa, Pakistan. *International Journal of Agriculture & Biology* 15:857-863.
- Ingrouille, M. J. and N. Smirnov. 1986. *THLASPI CAERULESCENS* J. & C. PRESL. (T. ALPESTRE U) IN BRITAIN. *New Phytol* 102.
- Irwin, M. J., J. J. Bougoure, and J. D. W. Dearnaley. 2007. *Pterostylis nutans* (Orchidaceae) has a specific association with two *Ceratobasidium* root-associated fungi across its range in eastern Australia. *Mycoscience* 48:231-239.
- Jacquemyn, H., O. Honnay, B. P. A. Cammue, R. Brys, and B. Lievens. 2010. Low specificity and nested subset structure characterize mycorrhizal associations in five closely related species of the genus *Orchis*. *Mol Ecol* 19:4086-4095.
- Jakucs, E., G. M. Kovács, R. Agerer, C. Romsics, and Z. Erős-Honti. 2005. Morphological-anatomical characterization and molecular identification of *Tomentella stiposa* ectomycorrhizae and related anatomotypes. *Mycorrhiza* 15:247-258.
- Jargeat, P., F. Martos, F. Carriconde, H. Gryta, P. A. Moreau, and M. Gardes. 2010. Phylogenetic species delimitation in ectomycorrhizal fungi and implications for barcoding: The case of the *Tricholoma scalpturatum* complex (Basidiomycota). *Mol Ecol* 19:5216-5230.
- Jargeat, P., P.-A. Moreau, H. Gryta, J.-P. Chaumeton, and M. Gardes. 2016. *Paxillus rubicundulus* (Boletales, Paxillaceae) and two new alder-specific ectomycorrhizal species, *Paxillus olivellus* and *Paxillus adelphus*, from Europe and North Africa. *Fungal Biol-Uk* 120:711-728.
- Jiang, J.-H., C.-C. Fang, S.-L. Tam, J.-F. Shiu, and L.-C. Chen. 2014. Mycorrhizal specificity of *Rhizoctonia* complex from Orchidaceae in Taiwan (Genbank accession: KJ573103).
- Jiang, J. H., C. C. Fang, S. L. Tam, J. F. Shiu, and L. C. Chen. 2012a. Mycorrhizal specificity of *Rhizoctonia* complex from Orchidaceae in Taiwan. Pp. JX514388 & JX514393-JX514388 & JX514393.
- Jiang, J. H., C. C. Fang, S. L. Tam, J. F. Shiu, and L. C. Chen. 2012b. Mycorrhizal specificity of *Rhizoctonia* complex from Orchidaceae in Taiwan (Genbank accession: JX514396; JX514387).
- Jiang, J. H., Y. I. Lee, M. A. Cubeta, and L. C. Chen. 2015. Characterization and colonization of endomycorrhizal *Rhizoctonia* fungi in the medicinal herb *Anoetochilus formosanus* (Orchidaceae). *Mycorrhiza* 25:431-445.

- Johnson, J.-M., P. Houngnandan, A. Kane, O. Chatagnier, K. B. Sanon, M. Neyra, and D. v. Tuinen. 2016. Colonization and molecular diversity of arbuscular mycorrhizal fungi associated with the rhizosphere of cowpea (*Vigna unguiculata* (L.) Walp.) in Benin (West Africa): an exploratory study. *Annals of Microbiology* 66:207-221.
- Julou, T., B. Burghardt, G. Gebauer, D. Berveiller, C. Damesin, and M. A. Selosse. 2005. Mixotrophy in orchids: Insights from a comparative study of green individuals and nonphotosynthetic individuals of *Cephalanthera damasonium*. *New Phytol* 166:639-653.
- Kai, W. and Z. Zhiwei. 2006. Occurrence of arbuscular mycorrhizas and dark septate endophytes in hydrophytes from lakes and streams in southwest China. *International Review of Hydrobiology* 91:29-37.
- Kandiannan, K., K. Sivaraman, M. Anandaraj, and K. S. Krishnamurthy. 2000. Growth and nutrient content of black pepper (*Piper nigrum* L.) cuttings as influenced by inoculation with biofertilizers. *Journal of Spices and Aromatic Crops* 9:145-147.
- Kausrud, H., S. Kumar, A. K. Brysting, J. Nordén, and T. Carlsen. 2012. High consistency between replicate 454 pyrosequencing analyses of ectomycorrhizal plant root samples. *Mycorrhiza* 22:309-315.
- Kawahara, A. and T. Ezawa. 2013. Characterization of arbuscular mycorrhizal fungal communities with respect to zonal vegetation in a coastal dune ecosystem. *Oecologia* 173:533-543.
- Kayama, M. and T. Yamanaka. 2014. Growth characteristics of ectomycorrhizal seedlings of *Quercus glauca*, *Quercus salicina*, and *Castanopsis cuspidata* planted on acidic soil. *Trees - Structure and Function* 28:569-583.
- Kennedy, P. G. and L. T. Hill. 2010. A molecular and phylogenetic analysis of the structure and specificity of *Alnus rubra* ectomycorrhizal assemblages. *Fungal Ecology* 3:195-204.
- Kernaghan, G., L. Sigler, and D. Khasa. 2003. Mycorrhizal and root endophytic fungi of containerized *Picea glauca* seedlings assessed by rDNA sequence analysis. *Microbial Ecology* 45:128-136.
- Kil, Y. J., J. K. Eo, E. H. Lee, and A. H. Eom. 2014. Root age-dependent changes in arbuscular mycorrhizal fungal communities colonizing roots of *Panax ginseng*. *Mycobiology* 42:416-421.
- Kjøller, R., M. Olsrud, and A. Michelsen. 2010. Co-existing ericaceous plant species in a subarctic mire community share fungal root endophytes. *Fungal Ecology* 3:205-214.
- Koffi, M. C. and S. Declerck. 2015. In vitro mycorrhization of banana (*Musa acuminata*) plantlets improves their growth during acclimatization. *In Vitro Cellular and Developmental Biology - Plant* 51:265-273.
- Kohout, P., R. Sudová, M. Janoušková, M. Čtvrtlíková, M. Hejda, H. Pánková, R. Slavíková, K. Štajerová, M. Vosátka, and Z. Sýkorová. 2014. Comparison of commonly used primer sets for evaluating arbuscular mycorrhizal fungal communities: Is there a universal solution? *Soil Biology and Biochemistry* 68:482-493.
- Kohout, P., Z. Sykorova, M. Ctvrtlikova, J. Rydlova, J. Suda, M. Vohnik, and R. Sudova. 2012. Surprising spectra of root-associated fungi in submerged aquatic plants. *FEMS Microbiol Ecol* 80:216-235.
- Kohout, P., T. Těšitelová, M. Roy, M. Vohník, and J. Jersáková. 2013. A diverse fungal community associated with *Pseudorchis albida* (Orchidaceae) roots. *Fungal Ecology* 6:50-64.
- Koizumi, T. and K. Nara. 2016. Two new species of *Rhizopogon* associated with *Pinus pumila* from Japan. *Mycoscience*.

- Kořaczek, P., S. Zubek, J. Błaszowski, P. Mleczko, and W. Margielewski. 2013. Erosion or plant succession - How to interpret the presence of arbuscular mycorrhizal fungi (Glomeromycota) spores in pollen profiles collected from mires. *Review of Palaeobotany and Palynology* 189:29-37.
- Kottke, I., A. Beck, F. Oberwinkler, J. Homeier, and D. Neill. 2004. Arbuscular endomycorrhizas are dominant in the organic soil of a neotropical montane cloud forest. *Journal of Tropical Ecology* 20:125-129.
- Kottke, I., A. Beiter, M. Weiss, I. Haug, F. Oberwinkler, and M. Nebel. 2003. Heterobasidiomycetes form symbiotic associations with hepatics: Jungermanniales have sebacinoid mycobionts while *Aneura pinguis* (Metzgeriales) is associated with a *Tulasnella* species. *Mycological Research* 107:957-968.
- Kottke, I. and I. Haug. 2004. The significance of mycorrhizal diversity of trees in the tropical mountain forest of southern Ecuador. *Lyonia* 7:49-56.
- Kovács, G. M. and E. Jakucs. 2006. Morphological and molecular comparison of white truffle ectomycorrhizae. *Mycorrhiza* 16:567-574.
- Krause, C., S. Garnica, R. Bauer, and M. Nebel. 2011. Aneuraceae (Metzgeriales) and tulasnelloid fungi (Basidiomycota) - a model for early steps in fungal symbiosis. *Fungal Biol-Uk* 115:839-851.
- Kricsfalusy, V. V. 2015. Taxonomy and phylogeny of *Anemone patens* L. sensu lato (Ranunculaceae): A critical review.
- Krpata, D., O. Mühlmann, R. Kuhnert, H. Ladurner, F. Göbl, and U. Peintner. 2007. High diversity of ectomycorrhizal fungi associated with *Arctostaphylos uva-ursi* in subalpine and alpine zones: Potential inoculum for afforestation. *Forest Ecology and Management* 250:167-175.
- Krüger, M., H. Stockinger, C. Krüger, and A. Schüssler. 2009. DNA-based species level detection of *Glomeromycota*: one PCR primer set for all arbuscular mycorrhizal fungi. *The New phytologist* 183:212-223.
- Kühdorf, K., B. Münzenberger, D. Begerow, J. Gómez-Laurito, and R. F. Hüttl. 2016. Arbutoid mycorrhizas of the genus *Cortinari* from Costa Rica. *Mycorrhiza*:1-17.
- Kumar, T., a. Majumdar, P. Das, V. Sarafis, and M. Ghose. 2008. Trypan blue as a fluorochrome for confocal laser scanning microscopy of arbuscular mycorrhizae in three mangroves. *Biotechnic & histochemistry : official publication of the Biological Stain Commission* 83:153-159.
- Kumla, J., B. Bussaban, N. Suwannarach, S. Lumyong, and E. Danell. 2012. Basidiome formation of an edible wild, putatively ectomycorrhizal fungus, *Phlebopus portentosus* without host plant. *Mycologia* 104:597-603.
- Kummel, M. and P. Lostroh. 2011. Altering light availability to the plant host determined the identity of the dominant ectomycorrhizal fungal partners and mediated mycorrhizal effects on plant growth. *Botany* 89:439-450.
- Kürschner, H. 2010. Amendments to the bryophyte flora of Lebanon, based on collections of C. B. Arzeni 1962–1964. *The Bryologist* 113:717-720.
- KYALANGALILWA, B., O. MAURIN, B. H. DARU, J. S. BOATWRIGHT, and M. V. D. BANK. 2012;. Phylogenetic position and revised classification of *Acacia* s.l. (Fabaceae: Mimosoideae) in Africa, including new combinations in *Vachellia* and *Senegalia*.
- Lamb, R. J. and B. N. Richards. 1970. Some mycorrhizal fungi of *Pinus radiata* and *P. elliottii* var. *elliottii* in Australia. *T Brit Mycol Soc* 54:371-378.
- Lamus, V., S. Franco, L. Montoya, A. R. Endara, L. A. Caballero, and V. M. Bandala. 2015. Mycorrhizal synthesis of the edible mushroom *Turbinellus floccosus* with *Abies religiosa* from central Mexico. *Mycoscience* 56:622-626.
- Lancellotti, E. and A. Franceschini. 2013. Studies on the ectomycorrhizal community in a declining *Quercus suber* L. stand. *Mycorrhiza* 23:533-542.
- Lancellotti, E., M. Iotti, A. Zambonelli, and A. Franceschini. 2014. Characterization of *Tuber borchii* and *Arbutus unedo* mycorrhizas. *Mycorrhiza* 24:481-486.
- Lang, C., J. Seven, and A. Polle. 2011. Host preferences and differential contributions of deciduous tree species shape mycorrhizal species richness in a mixed Central European forest. *Mycorrhiza* 21:297-308.

- LeDuc, S. D., E. A. Lilleskov, T. R. Horton, and D. E. Rothstein. 2013. Ectomycorrhizal fungal succession coincides with shifts in organic nitrogen availability and canopy closure in post-wildfire jack pine forests. *Oecologia* 172:257-269.
- Lee, J., S. Lee, and J. P. W. Young. 2008. Improved PCR primers for the detection and identification of arbuscular mycorrhizal fungi. *FEMS Microbiology Ecology* 65:339-349.
- Leski, T. and M. Rudawska. 2012. Ectomycorrhizal fungal community of naturally regenerated European larch (*Larix decidua*) seedlings. *Symbiosis* 56:45-53.
- Lewis, J. D. and B. R. Strain. 1996. The role of mycorrhizas in the response of *Pinus taeda* seedlings to elevated CO<sub>2</sub>. *New Phytol* 133:431-443.
- Ligrone, R., A. Carafa, E. Lumini, V. Bianciotto, P. Bonfante, and J. G. Duckett. 2007. Glomeromycotean associations in liverworts: A molecular, cellular, and taxonomic analysis. *American Journal of Botany* 94:1756-1777.
- Likar, M., U. Bukovnik, I. Kreft, N. K. Chrungoo, and M. Regvar. 2008. Mycorrhizal status and diversity of fungal endophytes in roots of common buckwheat (*Fagopyrum esculentum*) and tartary buckwheat (*F. tataricum*). *Mycorrhiza* 18:309-315.
- Liyuan, F. Y. and Y. W. Wang. 2011. Morphological Type and Molecular Identification of Ectomycorrhizae on *Picea crassifolia* in Helan Mountain. *Scientia Silvae Sinicae* 6:018-018.
- Long, D., J. Liu, Q. Han, X. Wang, and J. Huang. 2016. Ectomycorrhizal fungal communities associated with *Populus simonii* and *Pinus tabulaeformis* in the hilly-gully region of the Loess Plateau, China. *Scientific Reports* 6:24336-24336.
- Long, L. K., Q. Yao, J. Guo, R. H. Yang, Y. H. Huang, and H. H. Zhu. 2010. Molecular community analysis of arbuscular mycorrhizal fungi associated with five selected plant species from heavy metal polluted soils. *European Journal of Soil Biology* 46:288-294.
- Lorillou, S. S. and F. F. Martin. 1995. Cloning, sequence analysis and expression of a cDNA encoding NADP-glutamate dehydrogenase from the ectomycorrhizal basidiomycete *Laccaria bicolor* (Genbank accession: U31369).
- Ma, D., G. Yang, and L. Mu. 2010. Morphological and molecular analyses of ectomycorrhizal diversity in *Pinus densiflora* seedlings. *Symbiosis* 51:233-238.
- Ma, M., T. K. Tan, and S. M. Wong. 2003. Identification and molecular phylogeny of *Epulorhiza* isolates from tropical orchids. *Mycological research* 107:1041-1049.
- Malysheva, E. F., V. F. Malysheva, A. E. Kovalenko, E. A. Pimenova, M. N. Gromyko, and E. Y. Voronina. 2016. Below-Ground Ectomycorrhizal Community Structure in the Postfire Successional *Pinus koraiensis* Forests in the Central Sikhote-Alin (the Russian Far East). *Botanica Pacifica* 5:1-13.
- Manoharan, P. T., M. Pandi, V. Shanmugaiah, S. Gomathinayagam, and N. Balasubramanian. 2008. Effect of vesicular arbuscular mycorrhizal fungus on the physiological and biochemical changes of five different tree seedlings grown under nursery conditions. *J Biotechnol* 7:3431-3436.
- Martin, F., J. Diez, B. Dell, and C. Delaruelle. 2002. Phylogeography of the ectomycorrhizal *Pisolithus* species as inferred from nuclear ribosomal DNA ITS sequences. *New Phytol* 153:345-357.
- Martin, F., V. Gianinazzi-Pearson, M. Hijri, P. Lammers, N. Requena, I. R. Sanders, Y. Shachar-Hill, H. Shapiro, G. A. Tuskan, and J. P. W. Young. 2008. The long hard road to a completed *Glomus intraradices* genome. *New Phytol* 180:747-750.
- Martin, F., G. A. Tuskan, S. P. DiFazio, P. Lammers, G. Newcombe, and G. K. Podila. 2004. Symbiotic sequencing for the *Populus mesocosm*. *New Phytol* 161:330-335.
- Martínez-García, L. B., S. J. Richardson, J. M. Tylianakis, D. A. Peltzer, and I. A. Dickie. 2015. Host identity is a dominant driver of mycorrhizal fungal community composition during ecosystem development. *New Phytol* 205:1565-1576.

- Martos, F., M. Dulormne, T. Pailler, P. Bonfante, A. Faccio, J. Fournel, M. P. Dubois, and M. A. Selosse. 2009. Independent recruitment of saprotrophic fungi as mycorrhizal partners by tropical achlorophyllous orchids. *New Phytol* 184:668-681.
- Matsuda, Y., Y. Noguchi, and S. i. Ito. 2009. Ectomycorrhizal fungal community of naturally regenerated *Pinus thunbergii* seedlings in a coastal pine forest. *Journal of Forest Research* 14:335-341.
- McCormick, M. K., D. F. Whigham, and J. O'Neill. 2004. Mycorrhizal diversity in photosynthetic terrestrial orchids. *New Phytol* 163:425-438.
- McDonald, K. R., J. Pennell, J. L. Frank, and D. Southworth. 2010. Ectomycorrhizas of *Cercocarpus ledifolius* (rosaceae). *American Journal of Botany* 97:1867-1872.
- Meng, X.-J. and F.-R. Tang. 2001. Study on the promotion effects of mycorrhizae to *Populus davidiana* seedlings. *Mycosystema* 4.
- Menkis, A., A. Uotila, N. Arhipova, and R. Vasaitis. 2010. Effects of stump and slash removal on growth and mycorrhization of *Picea abies* seedlings outplanted on a forest clear-cut. *Mycorrhiza* 20:505-509.
- Midgley, D. J., S. M. Chambers, and J. W. G. Cairney. 2004. Inorganic and organic substrates as sources of nitrogen and phosphorus for multiple genotypes of two ericoid mycorrhizal fungal taxa from *Woollsia pungens* and *Leucopogon parviflorus* (Ericaceae). *Australian Journal of Botany* 52:63-71.
- Miyamoto, Y., T. Nakano, M. Hattori, and K. Nara. 2014. The mid-domain effect in ectomycorrhizal fungi: range overlap along an elevation gradient on Mount Fuji, Japan. *The ISME Journal* 8:1739-1746.
- Mohatt, K. R., C. L. Cripps, and M. Lavin. 2008. Ectomycorrhizal fungi of whitebark pine (a tree in peril) revealed by sporocarps and molecular analysis of mycorrhizae from treeline forests in the Greater Yellowstone Ecosystem. *Botany* 86:14-25.
- Montoya, L., I. Haug, and V. M. Bandala. 2010. Two *Lactarius* species associated with a relict *Fagus grandifolia* var. *mexicana* population in a Mexican montane cloud forest. *Mycologia* 102:153-162.
- Moora, M., M. Öpik, R. Sen, and M. Zobel. 2004. Native arbuscular mycorrhizal fungal communities differentially influence the seedling performance of rare and common *Pulsatilla* species. *Funct Ecol* 18:554-562.
- Moore, V. C., E. K. Dzanter, and D. Hui. 2015. Mycorrhizal Enhancement of Biomass Productivity of Big Bluestem and Switchgrass in Neutral and Acidic Substrate. *Journal of Applied Biosciences* 89:8263-8271.
- Moreau, P.-A. P. A., J. Rochet, F. Richard, F. Chassagne, S. Manzi, and M. Gardes. 2011. Taxonomy of *Alnus*-associated hypogeous species of *Alpova* and *Melanogaster* (Basidiomycota, Paxillaceae) in Europe. *Cryptogamie Mycologie* 32:33-62.
- Moreira, M., J. E. Gomes, E. J. B. N. Cardoso, and S. M. Tsai. 2005. Diversity of the arbuscular mycorrhizal fungi in tropical ecosystems (Genbank accession: AY919856 AY919855 AY919852 AY919848 AY919846).
- Mosquera-Espinosa, A. T., P. Bayman, and J. T. Otero. 2010. *Ceratobasidium* como hongo micorrízico de orquídeas en Colombia. *Acta Agronómica* 59:316-326.
- Mühlmann, O. and U. Peintner. 2008a. Ectomycorrhiza of *Kobresia myosuroides* at a primary successional glacier forefront. *Mycorrhiza* 18:355-362.
- Mühlmann, O. and U. Peintner. 2008b. Mycobionts of *Salix herbacea* on a glacier forefront in the Austrian Alps. *Mycorrhiza* 18:171-180.
- Nalian, A., J. van Kley, K. Stroup, and A. Martynova -Van Kley. 2010. Host Preferences of Arbuscular Mycorrhizae Along a Soil Nutrient and Hydrological Gradient. 76-81.
- Nara, K. 2006. Ectomycorrhizal networks and seedling establishment during early primary succession. *New Phytol* 169:169-178.

- Ndoye, F., A. Kane, E. L. Ngonkeu Mangaptché, N. Bakhoum, A. Sanon, D. Diouf, M. O. Sy, E. Baudoin, K. Noba, and Y. Prin. 2012. Changes in Land Use System and Environmental Factors Affect Arbuscular Mycorrhizal Fungal Density and Diversity, and Enzyme Activities in Rhizospheric Soils of *Acacia senegal* (L.) Willd. *ISRN Ecology* 2012:1-13.
- Niazi, A. R., S. H. Iqbal, and A. N. Khalid. 2009. Ectomycorrhizae between *Amanita rubescens* and Himalayan spruce (*Picea smithiana*) from Pakistan. *Mycotaxon* 107:73-80.
- Nomura, N., Y. Ogura-Tsujita, S. W. Gale, A. Maeda, H. Umata, K. Hosaka, and T. Yukawa. 2013. The rare terrestrial orchid *Nervilia nipponica* consistently associates with a single group of novel mycobionts. *Journal of Plant Research* 126:613-623.
- O'Brien, M. J., C. E. Gomola, and T. R. Horton. 2011. The effect of forest soil and community composition on ectomycorrhizal colonization and seedling growth. *Plant Soil* 341:321-331.
- Obase, K., Y. Matsuda, and S. i. Ito. 2013. *Enkianthus campanulatus* (Ericaceae) is commonly associated with arbuscular mycorrhizal fungi. *Mycorrhiza* 23:199-208.
- Ogura-Tsujita, Y., Y. Hirayama, A. Sakoda, A. Suzuki, A. Ebihara, N. Morita, and R. Imaichi. 2016. Arbuscular mycorrhizal colonization in field-collected terrestrial cordate gametophytes of pre-polypod leptosporangiate ferns (Osmundaceae, Gleicheniaceae, Plagiogyriaceae, Cyatheaceae). *Mycorrhiza* 26:87-97.
- Ogura-Tsujita, Y., J. Yokoyama, K. Miyoshi, and T. Yukawa. 2012. Shifts in mycorrhizal fungi during the evolution of autotrophy to mycoheterotrophy in *Cymbidium* (Orchidaceae). *American Journal of Botany* 99:1158-1176.
- Okuda, A., M. Yamato, and K. Iwase. 2011. The mycorrhiza of *Schizocodon soldanelloides* var. *magnus* (Diapensiaceae) is regarded as ericoid mycorrhiza from its structure and fungal identities. *Mycoscience* 52:425-430.
- Öpik, M., M. Moora, J. Liira, U. Kõljalg, M. Zobel, and R. Sen. 2003. Divergent arbuscular mycorrhizal fungal communities colonize roots of *Pulsatilla* spp. in boreal Scots pine forest and grassland soils. *New Phytol* 160:581-593.
- Opik, M., A. Vanatoa, E. Vanatoa, M. Moora, J. Davison, J. M. Kalwij, U. Reier, and M. Zobel. 2010. The online database MaarjAM reveals global and ecosystemic distribution patterns in arbuscular mycorrhizal fungi (Glomeromycota). *New Phytol* 188:223-241.
- Öpik, M., M. Zobel, J. J. Cantero, J. Davison, J. M. Facelli, I. Hiiesalu, T. Jairus, J. M. Kalwij, K. Koorem, M. E. Leal, J. Liira, M. Metsis, V. Neshataeva, J. Paal, C. Phosri, S. Põlme, Ü. Reier, Ü. Saks, H. Schimann, O. Thiéry, M. Vasar, and M. Moora. 2013. Global sampling of plant roots expands the described molecular diversity of arbuscular mycorrhizal fungi. *Mycorrhiza* 23:411-430.
- Orlovich, D. a., S. J. Draffin, R. a. Daly, and S. L. Stephenson. 2013. Piracy in the high trees: ectomycorrhizal fungi from an aerial 'canopy soil' microhabitat. *Mycologia* 105:52-60.
- Ormerod, P. 2008. Orchidaceous additions to the Philippine flora (II). *Taiwania* 53:157-164.
- Otero, J. T., J. D. Ackerman, and P. Bayman. 2002. Diversity and host specificity of endophytic Rhizoctonia-like fungi from tropical orchids. *American Journal of Botany* 89:1852-1858.
- Palenzuela, J., J.-M. Barea, N. Ferrol, and F. Oehl. 2010. *Ambispora granatensis*, a new arbuscular mycorrhizal fungus, associated with *Asparagus officinalis* in Andalusia (Spain). *Mycologia* 103:333-340.
- Palmer, J. M., D. L. Lindner, and T. J. Volk. 2008. Ectomycorrhizal characterization of an American chestnut (*Castanea dentata*)-dominated community in Western Wisconsin. *Mycorrhiza* 19:27-36.

- Panaccione, D. G., N. L. Sheets, S. P. Miller, and J. R. Cumming. 2001. Diversity of *Cenococcum geophilum* isolates from serpentine and non-serpentine soils. *Mycologia* 93:645-652.
- Pasonen, H. L., J. Lu, A. M. Niskanen, S. K. Seppänen, A. Rytönen, J. Raunio, A. Pappinen, R. Kasanen, and S. Timonen. 2009. Effects of sugar beet chitinase IV on root-associated fungal community of transgenic silver birch in a field trial. *Planta* 230:973-983.
- Pennington, H. G., M. I. Bidartondo, and N. Barsoum. 2011. A few exotic mycorrhizal fungi dominate eucalypts planted in England. *Fungal Ecology* 4:299-302.
- Pera, J. and I. F. Alvarez. 1995. Ectomycorrhizal fungi of *Pinus pinaster*. *Mycorrhiza* 5:193-200.
- Pereira, G., G. Palfner, D. Chávez, L. M. Suz, Á. Machuca, and M. Honrubia. 2013. Using common mycorrhizal networks for controlled inoculation of *Quercus* spp. with *Tuber melanosporum*: The nurse plant method. *Mycorrhiza* 23:373-380.
- Perner, H., D. Schwarz, and E. George. 2006. Effect of mycorrhizal inoculation and compost supply on growth and nutrient uptake of young leek plants grown on peat-based substrates. *HortScience* 41:628-632.
- Pham, N. D. H., A. Yamada, K. Shimizu, K. Noda, L. A. T. Dang, and A. Suzuki. 2012. A sheathing mycorrhiza between the tropical bolete *Phlebopus spongiosus* and *Citrus maxima*. *Mycoscience* 53:347-353.
- Phillips, W. S. 2012. Drivers of arbuscular mycorrhizal fungal community composition in roots: hosts, neighbors, and environment. Pp. 178-178.
- Plamboeck, A. H., T. E. Dawson, L. M. Egerton-Warburton, M. North, T. D. Bruns, and J. I. Querejeta. 2007. Water transfer via ectomycorrhizal fungal hyphae to conifer seedlings. *Mycorrhiza* 17:439-447.
- Poznanovic, S. K., E. A. Lilleskov, and C. R. Webster. 2014. Sharing rotting wood in the shade: ectomycorrhizal communities of co-occurring birch and hemlock seedlings. *Mycorrhiza* 25:153-164.
- Pressel, S., M. I. Bidartondo, R. Ligrone, and J. G. Duckett. 2010. Fungal symbioses in bryophytes : New insights in the Twenty First Century.
- Pressel, S., R. Ligrone, and J. G. Duckett. 2008a. Chapter Six: The Ascomycete *Rhizoscyphus ericae* Elicits a Range of Host Responses in the Rhizoids of Leafy Liverworts: An Experimental and Cytological Analysis. *Fieldiana Botany* 47:59-59.
- Pressel, S., R. Ligrone, J. G. Duckett, and E. C. Davis. 2008b. A novel ascomycetous endophytic association in the rhizoids of the leafy liverwort family, Schistochilaceae (Jungermanniidae, Hepaticopsida). *American Journal of Botany* 95:531-541.
- Preußing, M., S. Olsson, A. Schäfer-Verwimp, N. J. Wickert, S. Wicke, D. Quandt, and M. Nebel. 2010. New insights in the evolution of the liverwort family aneuraceae (Metzgeriales, Marchantiophyta), with emphasis on the genus *Lobatirricardia*. *Taxon* 59:1424-1440.
- Prin, Y., M. Ducousso, J. Tassin, G. Béna, P. Jourand, V. Dumontet, L. Moulin, C. Contesto, J.-P. Ambrosi, and C. Chaintreuil. 2012. Ectotrophic mycorrhizal symbioses are dominant in natural ultramafic forest ecosystems of New Caledonia. *The Mycorrhizal Symbiosis in Mediterranean Environment: Importance in Ecosystem Stability and in Soil Rehabilitation Strategies*
- Pritsch, K., A. Becerra, S. Pölme, L. Tedersoo, M. Schloter, and R. Agerer. 2010. Description and identification of *Alnus acuminata* ectomycorrhizae from Argentinean alder stands. *Mycologia* 102:1263-1273.
- Rainer, G., R. Kuhnert, M. Unterholzer, P. Dresch, A. Gruber, and U. Peintner. 2015. Host-Specialist Dominated Ectomycorrhizal Communities of *Pinus cembra* are not Affected by Temperature Manipulation. *Journal of Fungi* 1:55-75.
- Rajeshkannan, V., C. S. Sumathi, and S. Manian. 2009. Arbuscular Mycorrhizal Fungi Colonization in Upland Rice as Influenced by Agrochemical Application. *Rice Science* 16:307-313.



- Rao, C. S., G. D. Sharma, and A. K. Shukla. 1997. Distribution of ectomycorrhizal fungi in pure stands of different age groups of *Pinus kesiya*. *Canadian Journal of Microbiology* 43:85-91.
- Rath, M., H. C. Weber, and S. Imhof. 2013. Morpho-anatomical and molecular characterization of the mycorrhizas of European *Polygala* species. *Plant Biology* 15:548-557.
- Ray, A. M. and R. S. Inouye. 2006. Effects of water-level fluctuations on the arbuscular mycorrhizal colonization of *Typha latifolia* L. *Aquatic Botany* 84:210-216.
- Reithmeier, L. and G. Kernaghan. 2013. Availability of ectomycorrhizal fungi to black spruce above the present treeline in Eastern Labrador. *Plos One* 8:e77527-e77527.
- Renker, C., V. Blanke, and F. Buscot. 2005. Diversity of arbuscular mycorrhizal fungi in grassland spontaneously developed on area polluted by a fertilizer plant. *Environ Pollut* 135:255-266.
- Renker, C., J. Heinrichs, M. Kaldorf, and F. o. Buscot. 2003. Combining nested PCR and restriction digest of the internal transcribed spacer region to characterize arbuscular mycorrhizal fungi on roots from the field. *Mycorrhiza* 13:191-198.
- Reverchon, F., M. del Pilar Ortega-Larrocea, G. Bonilla-Rosso, and J. Pérez-Moreno. 2012. Structure and species composition of ectomycorrhizal fungal communities colonizing seedlings and adult trees of *Pinus montezumae* in Mexican neotropical forests. *FEMS Microbiology Ecology* 80:479-487.
- Rimington, W. R., S. Pressel, J. G. Duckett, and M. I. Bidartondo. 2015. Fungal associations of basal vascular plants: reopening a closed book? *New Phytol* 205:1394-1398.
- Rincón, A., I. F. Álvarez, and J. Pera. 1999. Ectomycorrhizal fungi of *Pinus pinea* L. in northeastern Spain. *Mycorrhiza* 8:271-276.
- Rincón, A., M. R. d. Felipe, and M. Fernández-Pascual. 2007. Inoculation of *Pinus halepensis* Mill. with selected ectomycorrhizal fungi improves seedling establishment 2 years after planting in a degraded gypsum soil. *Mycorrhiza* 18:23-32.
- Riofrío, M. L., D. Cruz, E. Torres, M. de La Cruz, J. M. Iriando, and J. P. Suárez. 2013. Mycorrhizal preferences and fine spatial structure of the epiphytic orchid *Epidendrum rhopalostele*. *American Journal of Botany* 100:2339-2348.
- Rivera, Y. and T. R. Horton. 2012. Exotic ectomycorrhizal fungal communities associated with *Pinus caribaea* on the island of Puerto Rico. Pp. JX017267-JX017267.
- Roy, M., S. Watthana, A. Stier, F. Richard, S. Vessabutr, and M.-A. Selosse. 2009. Two mycoheterotrophic orchids from Thailand tropical dipterocarpacean forests associate with a broad diversity of ectomycorrhizal fungi. *BMC biology* 7:51-51.
- Rudawska, M., M. Pietras, I. Smutek, P. Strzeliński, and T. Leski. 2016. Ectomycorrhizal fungal assemblages of *Abies alba* Mill. outside its native range in Poland. *Mycorrhiza* 26:57-65.
- Runjin, L. 1989. Effects of vesicular-arbuscular mycorrhizas and phosphorus on water status and growth of *Malus hupehensis*. *Journal of Plant Nutrition* 12:997-1017.
- Rusca, T. A., P. G. Kennedy, and T. D. Bruns. 2006. The effect of different pine hosts on the sampling of *Rhizopogon* spore banks in five Eastern Sierra Nevada forests. *New Phytol* 170:551-560.
- Ryberg, M., E. Larsson, and U. Molau. 2009. Ectomycorrhizal Diversity on *Dryas octopetala* and *Salix reticulata* in an Alpine Cliff Ecosystem. *Arctic, Antarctic, and Alpine Research* 41:506-514.

- Ryszka, P., M. Zarzyka-Ryszka, A. T., C. Maciej, and K. Turnau. 2015. Arbuscular mycorrhizal fungi from petroleum-impacted sites in the Polish Carpathians (Genbank accession: KP284252; KP284251; KP284250; KP284249; KP284248-KP284252; KP284251; KP284250; KP284249; KP284248).
- Sakamoto, Y., J. Yokoyama, and M. Maki. 2015. Mycorrhizal diversity of the orchid *Cephalanthera longibracteata* in Japan. *Mycoscience* 56:183-189.
- Saks, Ü., J. Davison, M. Öpik, M. Vasar, M. Moora, and M. Zobel. 2014. Root-colonizing and soil-borne communities of arbuscular mycorrhizal fungi in a temperate forest understorey 1. *NRC Research Press* 285:277-285.
- Schatz, B., A. Geoffroy, B. Dainat, B. Jean-Marie, B. Buatois, M. Hossaert-Mckey, and S. Marc-André. 2010. A case study of modified interactions with symbionts in a hybrid mediterranean orchid. *American Journal of Botany* 97:1278-1288.
- Selosse, M. A., S. Setaro, F. Glatard, F. Richard, C. Urcelay, and M. Weiss. 2007. Sebacinaleae are common mycorrhizal associates of Ericaceae. *New Phytol* 174:864-878.
- Selosse, M. A., M. Weiß, J. L. Jany, and A. Tillier. 2002. Communities and populations of sebacinoideae basidiomycetes associated with the achlorophyllous orchid *Neottia nidus-avis* (L.) L.C.M. Rich. and neighbouring tree ectomycorrhizae. *Mol Ecol* 11:1831-1844.
- Sempavalan, J., C. T. Wheeler, and J. E. Hooker. 1995. Lack of competition between *Frankia* and *Glomus* for infection and colonization of roots of *Casuarina equisetifolia* (L.). *New Phytol* 130:429-436.
- Setaro, S. D. and K. Kron. 2011. Neotropical and north american vaccinioideae (ericaceae) share their mycorrhizal sebacinaleae-an indication for concerted migration? *PLoS Currents*:1-19.
- Shan, X. C., E. C. Y. Liew, M. a. Weatherhead, and I. J. Hodgkiss. 2002. Characterization and taxonomic placement of Rhizoctonia-like endophytes from orchid roots. *Mycologia* 94:230-239.
- Sharma, D. and D. Kothamasi. 2013. AMF of mangroves (Genbank accession: KF555269; KF871027; KF871028; KF871030; KF871032; KF555266; KF555271; KF871044).
- Sharma, D. and D. Kothamasi. 2014a. Arbuscular mycorrhizal fungal (AMF) diversity in mangroves (Genbank accession: KF871041; KF871014; KF871011; KF871064; KF871048).
- Sharma, D. and D. Kothamasi. 2014b. Arbuscular mycorrhizal fungal (AMF) diversity in mangroves (Genbank accession: KF871063; KF871057; KF871056; KF555276; KF555268).
- Sharma, D. and D. Kothamasi. 2014c. Arbuscular mycorrhizal fungal (AMF) diversity in mangroves II (Genbank accession: KF871010 KF871009 KF871004 KF555259 KF871000 KF555-KF871010 KF871009 KF871004 KF555259 KF871000).
- Shefferson, R. P., C. C. Cowden, M. K. McCormick, T. Yukawa, Y. Ogura-Tsujita, and T. Hashimoto. 2010. Evolution of host breadth in broad interactions: Mycorrhizal specificity in East Asian and North American rattlesnake plantains (*Goodyera* spp.) and their fungal hosts. *Mol Ecol* 19:3008-3017.
- Shefferson, R. P., D. L. Taylor, M. Weiß, S. Garnica, M. K. McCormick, S. Adams, H. M. Gray, J. W. McFarland, T. Kull, K. Tali, T. Yukawa, T. Kawahara, K. Miyoshi, and Y. I. Lee. 2007. The evolutionary history of mycorrhizal specificity among lady's slipper orchids. *Evolution* 61:1380-1390.
- Shefferson, R. P., M. Weiß, T. Kull, and D. L. Taylor. 2005. High specificity generally characterizes mycorrhizal association in rare lady's slipper orchids, genus *Cypripedium*. *Mol Ecol* 14:613-626.
- Shepherd, M., L. Nguyen, M. E. Jones, J. D. Nichols, and F. L. Carpenter. 2007. A method for assessing arbuscular mycorrhizal fungi group distribution in tree roots by intergenic transcribed sequence variation. *Plant Soil* 290:259-268.

- Shimura, H., M. Sadamoto, M. Matsuura, T. Kawahara, S. Naito, and Y. Koda. 2009. Characterization of mycorrhizal fungi isolated from the threatened *Cypripedium macranthos* in a northern island of Japan: Two phylogenetically distinct fungi associated with the orchid. *Mycorrhiza* 19:525-534.
- Shu Fen, C., Y. Chih Hsing, J. Chen Han, and C. N. C. Doris. 2012. Growth and development of *Phaius tankervilleae* (Banks) Blume when inoculated with orchid mycorrhizal fungi. *African Journal of Agricultural Research* 7:5644-5652.
- Simon, B. K. and S. W. L. Jacobs. 2003. *Megathyrsus*, a new generic name for *Panicum* subgenus *Megathyrsus*. *Austrobaileya* 6:pp. 571-574.
- Siri-in, J., J. Kumla, N. Suwannarach, and S. Lumyong. 2014. Culture Conditions and Some Properties of Pure Culture of Ectomycorrhizal Fungus , *Scleroderma sinnamariense*. *Chiang Mai Journal Science* 41:275-285.
- Smith, M. E., G. W. Douhan, A. K. Fremier, and D. M. Rizzo. 2009. Are true multihost fungi the exception or the rule? Dominant ectomycorrhizal fungi on *Pinus sabiniana* differ from those on co-occurring *Quercus* species. *New Phytol* 182:295-299.
- Söderström, L., R. d. Roo, and T. Hedderson. 2010. Taxonomic novelties resulting from recent reclassification of the Lophoziaceae/ Scapaniaceae clade. *Phytotaxa* 3:47-53.
- Solaiman, Z. M. and L. K. Abbott. 2008. Influence of arbuscular mycorrhizal fungi, inoculum level and phosphorus placement on growth and phosphorus uptake of *Phyllanthus calycinus* under jarrah forest soil. *Biology and Fertility of Soils* 44:815-821.
- Sommer, J., J. Pausch, M. C. Brundrett, K. W. Dixon, M. I. Bidartondo, and G. Gebauer. 2012. Limited carbon and mineral nutrient gain from mycorrhizal fungi by adult Australian Orchids. *American Journal of Botany* 99:1133-1145.
- Southworth, D. 2013. Oaks and Mycorrhizal Fungi. Pp. 207-218 in C. A. Chuteira, and A. B. Grao, eds. Nova Science Publishers, New York.
- Staddon, P. L., J. D. Graves, and A. H. Fitter. 1999. Effect of enhanced atmospheric CO<sub>2</sub> on mycorrhizal colonization and phosphorus inflow in 10 herbaceous species of contrasting growth strategies. *Funct Ecol* 13:190-199.
- Stark, C., W. Babik, and W. Durka. 2009. Fungi from the roots of the common terrestrial orchid *Gymnadenia conopsea*. *Mycological Research* 113:952-959.
- Steere, W. C. 1942. Notes on Michigan bryophytes - IV. *The Bryologist* 45:153-172.
- Strullu-Derrien, C., P. Kenrick, S. Pressel, J. G. Duckett, J. P. Rioult, and D. G. Strullu. 2014. Fungal associations in *Horneophyton ligneri* from the Rhynie Chert (c. 407 million year old) closely resemble those in extant lower land plants: Novel insights into ancestral plant-fungus symbioses. *New Phytol* 203:964-979.
- Suárez, J. P., M. Weiß, A. Abele, S. Garnica, F. Oberwinkler, and I. Kottke. 2006. Diverse tulasnelloid fungi form mycorrhizas with epiphytic orchids in an Andean cloud forest. *Mycological Research* 110:1257-1270.
- Sumorok, B. and E. Kiedrzyńska. 2007. Mycorrhizal status of native willow species in the Pilica River floodplain along the moisture gradient. *Wetlands: Monitoring, Modelling and Management*:281-286 ST - Mycorrhizal status of native willow.
- Sýkorová, Z., B. Börstler, S. Zvolenská, J. Fehrer, M. Gryndler, M. Vosátka, and D. Redecker. 2012. Long-term tracing of *Rhizophagus irregularis* isolate BEG140 inoculated on *Phalaris arundinacea* in a coal mine spoil bank, using mitochondrial large subunit rDNA markers. *Mycorrhiza* 22:69-80.
- Sýkorová, Z., K. Ineichen, A. Wiemken, and D. Redecker. 2007a. The cultivation bias: Different communities of arbuscular mycorrhizal fungi detected in roots from the field, from bait plants transplanted to the field, and from a greenhouse trap experiment. *Mycorrhiza* 18:1-14.
- Sýkorová, Z., J. Rydlová, R. Slavíková, T. Ness, P. Kohout, and D. Püschel. 2016. Forest reclamation of fly ash deposit: A field study on appraisal of mycorrhizal inoculation. *Restoration Ecology* 24:184-193.

- Sýkorová, Z., A. Wiemken, and D. Redecker. 2007b. Cooccurring *Gentiana verna* and *Gentiana acaulis* and their neighboring plants in two Swiss upper montane meadows harbor distinct arbuscular mycorrhizal fungal communities. *Appl Environ Microb* 73:5426-5434.
- Symanczik, S., J. Blaszkowski, G. Chwat, Boller, W. T., A., and M. N. Al-Yahya'Ei. 2014. Arbuscular mycorrhizal fungal species from Oman (Genbank accession: JX999970).
- Tan, X. M., C. L. Wang, X. M. Chen, Y. Q. Zhou, Y. Q. Wang, A. X. Luo, Z. H. Liu, and S. X. Guo. 2014. In vitro seed germination and seedling growth of an endangered epiphytic orchid, *Dendrobium officinale*, endemic to China using mycorrhizal fungi (*Tulasnella* sp.). *Scientia Horticulturae* 165:62-68.
- Tang, F., J. A. White, and I. Charvat. 2001. The effect of phosphorus availability on arbuscular mycorrhizal colonization of *Typha angustifolia*. *Mycologia* 93:1042-1047.
- Taylor, L. L., J. R. Leake, J. Quirk, K. Hardy, S. A. Banwart, and D. J. Beerling. 2009. Biological weathering and the long-term carbon cycle: Integrating mycorrhizal evolution and function into the current paradigm. *Geobiology* 7:171-191.
- Tedersoo, L., G. Gates, C. W. Dunk, T. Lebel, T. W. May, U. Kõljalg, and T. Jairus. 2009a. Establishment of ectomycorrhizal fungal community on isolated *Nothofagus cunninghamii* seedlings regenerating on dead wood in Australian wet temperate forests: Does fruit-body type matter? *Mycorrhiza* 19:403-416.
- Tedersoo, L., K. Hansen, B. A. Perry, and R. Kjølner. 2006. Molecular and morphological diversity of pezizalean ectomycorrhiza. *New Phytol* 170:581-596.
- Tedersoo, L., P. Pellet, U. Kõljalg, and M. A. Selosse. 2007a. Parallel evolutionary paths to mycoheterotrophy in understorey Ericaceae and Orchidaceae: Ecological evidence for mixotrophy in Pyroleae. *Oecologia* 151:206-217.
- Tedersoo, L. and S. Põlme. 2012. Infrageneric variation in partner specificity: Multiple ectomycorrhizal symbionts associate with *Gnetum gnemon* (Gnetophyta) in Papua New Guinea. *Mycorrhiza* 22:663-668.
- Tedersoo, L., T. Suvi, K. Beaver, and U. Kõljalg. 2007b. Ectomycorrhizal fungi of the Seychelles: Diversity patterns and host shifts from the native *Vateriopsis seychellarum* (Dipterocarpaceae) and *Intsia bijuga* (Caesalpiniaceae) to the introduced *Eucalyptus robusta* (Myrtaceae), but not *Pinus caribea* (Pinaceae). *New Phytol* 175:321-333.
- Tedersoo, L., T. Suvi, T. Jairus, I. Ostonen, and S. Põlme. 2009b. Revisiting ectomycorrhizal fungi of the genus *Alnus*: Differential host specificity, diversity and determinants of the fungal community. *New Phytol* 182:727-735.
- Těšitelová, T., J. Jersáková, M. Roy, B. Kubátová, J. Těšitel, T. Urfus, P. Trávníček, and J. Suda. 2013. Ploidy-specific symbiotic interactions: Divergence of mycorrhizal fungi between cytotypes of the *Gymnadenia conopsea* group (Orchidaceae). *New Phytol* 199:1022-1033.
- Těšitelová, T., M. Kotlínek, J. Jersáková, F.-X. Joly, J. Košnar, I. Tatarenko, and M.-A. Selosse. 2015. Two widespread green *Neottia* species (Orchidaceae) show mycorrhizal preference for Sebaciniales in various habitats and ontogenetic stages. *Mol Ecol* 24:1122-1134.
- Tešitelová, T., J. Tešitel, J. Jersáková, G. Říhová, and M. A. Selosse. 2012. Symbiotic germination capability of four epipactis species (orchidaceae) is broader than expected from adult ecology. *American Journal of Botany* 99:1020-1032.
- Theodorou, C. and P. Reddell. 1991. In vitro Synthesis of Ectomycorrhizas on Casuarinaceae With a Range of Mycorrhizal Fungi. *New Phytol* 118:279-288.
- Tian, W., C. Q. Zhang, P. Qiao, and R. Milne. 2011. Diversity of culturable ericoid mycorrhizal fungi of *Rhododendron decorum* in Yunnan, China. *Mycologia* 103:703-709.

- Timling, I., A. Dahlberg, D. A. Walker, M. Gardes, J. Y. Charcosset, J. M. Welker, and D. L. Taylor. 2012. Distribution and drivers of ectomycorrhizal fungal communities across the North American Arctic. *Ecosphere* 3:1-25.
- Titus, J. H., R. d. Moral, and S. Gamiet. 1998. The distribution of vesicular-arbuscular mycorrhizae on mount St. Helens, Washington. *Madroño* 45:162-170.
- Tomeo, N. J. and C. J. Springer. 2012. Mycorrhizal communities in a precipitation variability experiment (Genbank accession: JX276924 JX276923 JX276922 JX276921 JX276920).
- Torrecillas, E., M. d. M. Alguacil, A. Roldán, G. Díaz, A. Montesinos-Navarro, and M. P. Torres. 2014. Modularity reveals the tendency of arbuscular mycorrhizal fungi to interact differently with generalist and specialist plant species in gypsum soils. *Appl Environ Microb* 80:5457-5466.
- Torrecillas, E., M. M. Alguacil, and A. Roldán. 2012. Host preferences of arbuscular mycorrhizal fungi colonizing annual herbaceous plant species in semiarid mediterranean prairies. *Appl Environ Microb* 78:6180-6186.
- Trocha, L. K., I. Kałucka, M. Stasińska, W. Nowak, M. Dabert, T. Leski, M. Rudawska, and J. Oleksyn. 2012. Ectomycorrhizal fungal communities of native and non-native *Pinus* and *Quercus* species in a common garden of 35-year-old trees. *Mycorrhiza* 22:121-134.
- Trocha, L. K., E. Weiser, and P. Robakowski. 2016. Interactive effects of juvenile defoliation, light conditions, and interspecific competition on growth and ectomycorrhizal colonization of *Fagus sylvatica* and *Pinus sylvestris* seedlings. *Mycorrhiza* 26:47-56.
- Troia, A. and W. Greuter. 2014. A critical conspectus of Italian Isoetes (Isoetaceae). *Plant Biosystems* 148:13-20.
- Twieg, B. D., D. M. Durall, S. W. Simard, and M. D. Jones. 2009. Influence of soil nutrients on ectomycorrhizal communities in a chronosequence of mixed temperate forests. *Mycorrhiza* 19:305-316.
- Tyub, S., T. A. Mokhdomi, S. Bukhari, Z. A. Reshi, R. A. Qadri, and A. N. Kamili. 2014. ITS-based molecular profiling of root-tips identifies novel ectomycorrhizae associated with *Pinus wallichiana* A.B. Jackson in temperate forests of Kashmir Himalaya. Pp. KP109910-KP109910.
- Upton, R., D. Read, and K. Newsham. 2007. Widespread association between the ericoid mycorrhizal fungus *Rhizoscyphus ericae* and a leafy liverwort in the maritime and sub-Antarctic. *New Phytol* 176:460-471.
- Verma, B. and M. Sudhakara Reddy. 2014. *Suillus triacicularis* sp. nov., a new species associated with *Pinus roxburghii* from northwestern Himalayas, India. *Phytotaxa* 162:157-164.
- Vincenot, L., L. Tedersoo, F. Richard, H. Horcine, U. Kõljalg, and M. A. Selosse. 2008. Fungal associates of *Pyrola rotundifolia*, a mixotrophic Ericaceae, from two Estonian boreal forests. *Mycorrhiza* 19:15-25.
- Vozzo, J. A. and E. Hacskeylo. 1971. Inoculation of *Pinus caribaea* with ectomycorrhizal fungi in Puerto Rico. *Forest Science* 17:239-245.
- Vrålstad, T., E. Myhre, and T. Schumacher. 2002. Molecular diversity and phylogenetic affinities of symbiotic root-associated ascomycetes of the Helotiales in burnt and metal polluted habitats. *New Phytol* 155:131-148.
- Walker, C. 1985. Endogone-Lactiflua Forming Ectomycorrhizas with *Pinus-Contorta*. *T Brit Mycol Soc* 84:353-355.
- Wang, B. and Y. L. Qiu. 2006. Phylogenetic distribution and evolution of mycorrhizas in land plants. *Mycorrhiza* 16:299-363.
- Wang, Q., C. Gao, and L. D. Guo. 2011. Ectomycorrhizae associated with *Castanopsis fargesii* (Fagaceae) in a subtropical forest, China. *Mycol Prog* 10:323-332.
- Wang, R. R. C. and C. Hsiao. 1984. Morphology and Cytology of Interspecific Hybrids of *Leymus-Mollis*. *J Hered* 75:488-492.
- Wang, Y. S., L. Chen, S. B. Zhang, and Y. Y. Liu. 2010. Biodiversity of arbuscular mycorrhizal fungi in the natural forests of *Populus euphratica* and *Alhagi sparsifolia* in Xinjiang. *Arid Zone Research* 27:927-932.

- Waterman, R. J., M. I. Bidartondo, J. Stofberg, J. K. Combs, G. Gebauer, V. Savolainen, T. G. Barraclough, and A. Pauw. 2011. The effects of above- and belowground mutualisms on orchid speciation and coexistence. *The American naturalist* 177:E54-E68.
- Weber, J., M. Ducouso, F. Y. Tham, S. Nourissier-Mountou, A. Galiana, Y. Prin, and S. K. Lee. 2005. Co-inoculation of *Acacia mangium* with *Glomus intraradices* and *Bradyrhizobium* sp. in aeroponic culture. *Biology and Fertility of Soils* 41:233-239.
- Weiss, M., M. A. Selosse, K. H. Rexer, A. Urban, and F. Oberwinkler. 2004. Sebacinales: a hitherto overlooked cosm of heterobasidiomycetes with a broad mycorrhizal potential. *Mycol Res* 108:1003-1010.
- Wickett, N. J. and B. Goffinet. 2008. Origin and relationships of the myco-heterotrophic liverwort *Cryptothallus mirabilis* Malmb. (Metzgeriales, Marchantiophyta). *Botanical Journal of the Linnean Society* 156:1-12.
- Wiegand, K. M. 1899. A Revision of the Genus *Listera*. *Bulletin of the Torrey Botanical Club*.
- Wilcox, H. E. and C. J. K. Wang. 1987. Ectomycorrhizal and ectendomycorrhizal associations of *Phialophora finlandia* with *Pinus resinosa*, *Picea rubens*, and *Betula alleghaniensis*. *Canadian Journal of Forest Research* 17:976-990.
- Wilde, P., A. Manal, M. Stodden, E. Sieverding, U. Hildebrandt, and H. Bothe. 2009. Biodiversity of arbuscular mycorrhizal fungi in roots and soils of two salt marshes. *Environ Microbiol* 11:1548-1561.
- Wu, B., K. Nara, and T. Hogetsu. 1999. Competition between ectomycorrhizal fungi colonizing *Pinus densiflora*. *Mycorrhiza* 9:151-159.
- Wu, B., K. Nara, and T. Hogetsu. 2005. Genetic structure of *Cenococcum geophilum* populations in primary successional volcanic deserts on Mount Fuji as revealed by microsatellite markers. *New Phytol* 165:285-293.
- Wu, J., H. Ma, M. Lü, S. Han, Y. Zhu, H. Jin, J. Liang, L. Liu, and J. Xu. 2010. Rhizoctonia fungi enhance the growth of the endangered orchid *Cymbidium goeringii*. *Botany* 88:20-29.
- Wu, L. and S. Guo. 2008. Interaction between an isolate of dark-septate fungi and its host plant *Saussurea involucreta*. *Mycorrhiza* 18:79-85.
- Wubet, T., M. Weiß, I. Kottke, and F. Oberwinkler. 2006. Two threatened coexisting indigenous conifer species in the dry Afromontane forests of Ethiopia are associated with distinct arbuscular mycorrhizal fungal communities. *Canadian Journal of Botany* 84:1617-1627.
- Xiaohua, J., C. Singchi, and L. Yibo. 2009. Taxonomic revision of *Dendrobium moniliforme* complex (Orchidaceae). *Scientia Horticulturae* 120:143-145.
- Xing, X., X. Ma, Z. Deng, J. Chen, F. Wu, and S. Guo. 2013. Specificity and preference of mycorrhizal associations in two species of the genus *Dendrobium* (Orchidaceae). *Mycorrhiza* 23:317-324.
- Xinqi, C., L. Zhongjian, Z. Guanghua, L. Kaiyong, J. Zhanhe, L. Yibo, J. Xiaohua, P. J. Cribb, J. J. Wood, S. W. Gale, P. Ormerod, J. J. Vermeulen, H. P. Wood, D. Clayton, and A. Bell. 2009. ORCHIDACEAE in Z. Y. Wu, P. H. Raven, and D. Y. Hong, eds. *Flora of China*. Vol. 25 (Orchidaceae). Science Press, Beijing, and Missouri Botanical Garden Press, St. Louis.
- Yagame, T., E. Funabiki, E. Nagasawa, T. Fukiharuru, and K. Iwase. 2013. Identification and symbiotic ability of Psathyrellaceae fungi isolated from a photosynthetic orchid, *Cremastra appendiculata* (Orchidaceae). *American Journal of Botany* 100:1823-1830.
- Yamada, A., T. Ogura, and M. Ohmasa. 2001. Cultivation of mushrooms of edible ectomycorrhizal fungi associated with *Pinus densiflora* by in vitro mycorrhizal synthesis. II. Morphology of mycorrhizas in open-pot soil. *Mycorrhiza* 11:67-81.
- Yamato, M., Y. Ogura-Tsujita, H. Takahashi, and T. Yukawa. 2014. Significant difference in mycorrhizal specificity between an autotrophic and its sister mycoheterotrophic plant species of Petrosaviaceae. *Journal of Plant Research* 127:685-693.

- Yang, K., L. Li, T. Hu, Z. Tang, C. Zhuang, and Z. Liu. 2007. Isolation and identification of Cymbidium plants mycorrhizal fungi (Genbank accession: EF393621).
- Yergeau, E., V. Vujanovic, and M. St-Arnaud. 2006. Changes in communities of *Fusarium* and arbuscular mycorrhizal fungi as related to different asparagus cultural factors. *Microbial Ecology* 52:104-113.
- Yoh-ichi Matsubara, T. and Karikomi. 1996. Effect of Arbuscular Mycorrhizal Fungus Inoculation on Growth of Apple ( *Malus ssp.* ) Seedlings. *Japan. Soc. Hort. Sci* 65:297-302.
- Yoshimura, Y., A. Ido, K. Iwase, T. Matsumoto, and M. Yamato. 2013. Communities of Arbuscular Mycorrhizal Fungi in the Roots of *Pyrus pyrifolia* var. *culta* (Japanese Pear) in Orchards with Variable Amounts of Soil-Available Phosphorus. *Microbes and Environments* 28:105-111.
- Youpensuk, S., S. Lordkaew, and B. Rerkasem. 2009. Genotypic Variation in Responses of Citrus spp . to Arbuscular Mycorrhizal Fungi. *Journal of Agriculture Science* 1:59-65.
- Yuan, L., Z. L. Yang, S. Y. Li, H. Hu, and J. L. Huang. 2010. Mycorrhizal specificity, preference, and plasticity of six slipper orchids from South Western China. *Mycorrhiza* 20:559-568.
- Yuan, Y., J. Tang, D. Leng, S. Hu, J. W. H. Yong, and X. Chen. 2014. An invasive plant promotes its arbuscular mycorrhizal symbioses and competitiveness through its secondary metabolites: Indirect evidence from activated carbon. *Plos One* 9.
- Yuwa-Amornpitak, T., T. Vichitsoonthonkul, M. Tanticharoen, S. Cheevadhanarak, and S. Ratchadawong. 2006. Diversity of ectomycorrhizal fungi on *Dipterocarpaceae* in Thailand. *Journal of Biological Sciences* 6:1059-1064.
- Zandavalli, R. B., L. c. R. Dillenburg, and P. V. D. De Souza. 2004. Growth responses of *Araucaria angustifolia* (Araucariaceae) to inoculation with the mycorrhizal fungus *Glomus clarum*. *Appl Soil Ecol* 25:245-255.
- Zhang, C., L. Yin, and S. Dai. 2009. Diversity of root-associated fungal endophytes in *Rhododendron fortunei* in subtropical forests of China. *Mycorrhiza* 19:417-423.
- Zhang, H. and M. Tang. 2011. Arbuscular mycorrhizal community and glomalin content associated with the rhizosphere of *Lycium barbarum* in arid Northwestern China (Genbank accession: JF432017, JF432016, JF432015, JF432014, JF432013).
- Zhang, H. H., M. Tang, H. Chen, Y. Wang, and Y. Ban. 2010a. Arbuscular mycorrhizas and dark septate endophytes colonization status in medicinal plant *Lycium barbarum* L. in arid Northwestern China. *African Journal of Microbiology Research* 4:1914-1920.
- Zhang, Q., R. Yang, J. Tang, H. Yang, S. Hu, and X. Chen. 2010b. Positive feedback between mycorrhizal fungi and plants influences plant invasion success and resistance to invasion. *Plos One* 5.
- Zhou, L. and S. Guo. 2013. Distinct arbuscular mycorrhizal fungi communities in roots of *Gynostemma pentaphyllum* (Genbank accession: KC465780; KC465779; KC465778; KC465777; KC465776).
- Zimmer, K., N. A. Hynson, G. Gebauer, E. B. Allen, M. F. Allen, and D. J. Read. 2007. Wide geographical and ecological distribution of nitrogen and carbon gains from fungi in pyroloids and monotropoids (*Ericaceae*) and in orchids. *New Phytol* 175:166-175.
- Zimmer, K., C. Meyer, and G. Gebauer. 2008. The ectomycorrhizal specialist orchid *Corallorhiza trifida* is a partial myco-heterotroph. *New Phytol* 178:395-400.
- Zomlefer, W. B. and W. S. Judd. 2002. Resurrection of segregates of the polyphyletic genus *Zigadenus* s.l. (*Liliales* : *Melanthiaceae*) and resulting new combinations. *Novon* 12:299-308.

Zong, K., J. Huang, K. Nara, Y. Chen, Z. Shen, and C. Lian. 2015. Inoculation of ectomycorrhizal fungi contributes to the survival of tree seedlings in a copper mine tailing. *Journal of Forest Research* 20:493-500.



**Table S3 | Taxon sampling and Genbank accession numbers of the data used for the phylogenetic inference of Embryophytes.**

| species (phylogenetic reconstruction) | Used in ancestral state reconstruction | Genbank accession |           |           |
|---------------------------------------|----------------------------------------|-------------------|-----------|-----------|
|                                       |                                        | rbcL              | psbA      | rps4      |
| Abies_alba                            | +                                      | AB029652          | NA        | NA        |
| Abies_balsamea                        | +                                      | JN935605          | NA        | NA        |
| Abies_homolepis                       | +                                      | AB015648          | NA        | AY188224  |
| Abies_magnifica                       | +                                      | X58391            | NA        | NA        |
| Abies_nordmanniana                    | +                                      | AB029654          | NA        | NA        |
| Abies religiosa                       | +                                      | JN935629          | NA        | NA        |
| Acacia_mangium                        | +                                      | KJ440053          | NA        | NA        |
| Acanthus_ilicifolius                  | +                                      | KF848219          | NA        | NA        |
| Acer_macrophyllum                     | +                                      | DQ978414          | NA        | NA        |
| Acer_platanoides                      | +                                      | DQ978424          | NA        | NA        |
| Acer_pseudoplatanus                   | +                                      | DQ978425          | NA        | NA        |
| Achillea_millefolium                  | +                                      | EU384938          | NA        | NA        |
| Acianthus_exsertus                    | +                                      | AF074101          | NA        | NA        |
| Adiantum_capillus_veneris             | -                                      | NC_004766         | NC_004766 | NC_004766 |
| Aegiceras_corniculatum                | +                                      | AY289687          | NA        | NA        |
| Aegopodium_podagraria                 | +                                      | U50220            | NA        | NA        |
| Afrocarpus_falcatus                   | +                                      | X58135            | NA        | AY188254  |
| Azelia_africana                       | +                                      | KJ735963          | NA        | NA        |
| Agarista_salicifolia                  | +                                      | AF124588          | NA        | NA        |
| Agrostis_capillaris                   | +                                      | AY395527          | NA        | NA        |
| Agrostis_scabra                       | +                                      | JX848486          | NA        | NA        |
| Agrostis_stolonifera                  | +                                      | NC_008591         | NC_008591 | NC_008591 |
| Ajuga_reptans                         | +                                      | NC_023102         | NC_023102 | NC_023102 |
| Allisonia_cockaynei                   | +                                      | AY507389          | AY507472  | AY507432  |
| Allium_ampeloprasum                   | +                                      | HM849754          | NA        | NA        |
| Allium_cepa                           | +                                      | NC_024813         | NC_024813 | NC_024813 |
| Allium_fistulosum                     | +                                      | JQ273895          | JQ275949  | JQ274288  |
| Alnus_acuminata                       | +                                      | KF418925          | NA        | NA        |
| Alnus_alnobetula                      | +                                      | AY263926          | NA        | EU002289  |
| Alnus_cordata                         | +                                      | FJ844569          | NA        | NA        |
| Alnus_glutinosa                       | +                                      | KM360625          | NA        | NA        |
| Alnus_incana                          | +                                      | HM849757          | NA        | NA        |
| Alnus_nitida                          | +                                      | KF418931          | NA        | NA        |
| Alnus_rubra                           | +                                      | KF418933          | NA        | NA        |
| Alsophila_spinulosa                   | -                                      | NC_012818         | NC_012818 | NC_012818 |
| Alzatea_verticillata                  | +                                      | U26316            | NA        | NA        |
| Amborella_trichopoda                  | -                                      | NC_005086         | NC_005086 | NC_005086 |
| Ammophila_arenaria                    | +                                      | JN890705          | NA        | NA        |
| Ammophila_breviligulata               | +                                      | AJ784835          | NA        | NA        |
| Anacamptis_laxiflora                  | +                                      | KF997401          | NA        | NA        |
| Anacamptis_morio                      | +                                      | KF997322          | NA        | NA        |
| Anagallis_arvensis                    | +                                      | M88343            | NA        | NA        |
| Andromeda_polifolia                   | +                                      | AF124572          | NA        | NA        |
| Andropogon_gerardii                   | +                                      | AJ784818          | NA        | NA        |
| Anemone_patens                        | +                                      | KR297057          | KR297057  | KR297057  |
| Aneura_maxima                         | +                                      | EF547813          | NA        | DQ983855  |
| Aneura_mirabilis                      | +                                      | NC_010359         | NC_010359 | NC_010359 |
| Aneura_pinguis                        | +                                      | AB476550          | AY507474  | AY608043  |
| Angiopteris_angustifolia              | -                                      | NC_026300         | NC_026300 | NC_026300 |
| Angiopteris_evecta                    | -                                      | NC_008829         | NC_008829 | NC_008829 |
| Anisoptera_costata                    | +                                      | KJ594581          | NA        | NA        |
| Anogramma_leptophylla                 | +                                      | AY168715          | NA        | NA        |
| Antennaria_dioica                     | +                                      | KF602143          | NA        | NA        |
| Anthoceros_agrestis                   | +                                      | DQ845682          | NA        | KP238684  |
| Anthoceros_angustus                   | -                                      | NC_004543         | NC_004543 | NC_004543 |
| Anthoceros_fusiformis                 | +                                      | DQ845677          | NA        | NA        |
| Anthoceros_lamellatus                 | +                                      | DQ845679          | NA        | KP238690  |
| Anthoceros_laminiferus                | +                                      | AY463053          | NA        | KP238691  |
| Anthoceros_punctatus                  | +                                      | U87063            | NA        | AJ250117  |
| Anthoxanthum_odoratum                 | +                                      | AJ746256          | NA        | Z29228    |
| Aphyllorchis_montana                  | +                                      | FJ454874          | NA        | NA        |
| Arachis_hypogaea                      | +                                      | NC_026676         | NC_026676 | NC_026676 |
| Araucaria_angustifolia                | +                                      | U87750            | NA        | EU165034  |
| Arbutus_unedo                         | +                                      | JQ067650          | JQ067650  | JQ067650  |
| Arctostaphylos_uva-ursi               | +                                      | GU176649          | NA        | NA        |
| Aristida_adscensionis                 | +                                      | EF423002          | NA        | NA        |
| Arnica_montana                        | +                                      | KF602249          | NA        | NA        |
| Arrhenatherum_elatius                 | +                                      | AJ784823          | NA        | NA        |
| Artemisia_frigida                     | +                                      | NC_020607         | NC_020607 | NC_020607 |
| Artemisia_ludoviciana                 | +                                      | JX848405          | NA        | NA        |

|                              |   |           |           |           |
|------------------------------|---|-----------|-----------|-----------|
| Artemisia_vulgaris           | + | KM360653  | NA        | NA        |
| Arthrocnemum_macrostachyum   | + | AY270058  | NA        | NA        |
| Arum_italicum                | + | GU067578  | NA        | X84113    |
| Arum_maculatum               | + | GU067582  | NA        | NA        |
| Arundina_graminifolia        | + | AF074111  | NA        | NA        |
| Asparagus_officinalis        | + | HQ182417  | HQ181820  | JQ274297  |
| Aster_tripolium              | + | JN891980  | NA        | NA        |
| Athyrium_yokoscense          | + | D43893    | NA        | JN168078  |
| Austrobaileya_scandens       | + | L12632    | NA        | AF313613  |
| Austrocedrus_chilensis       | + | EU161449  | NA        | EU161501  |
| Austrofossombronia_australis | + | AY507392  | AY507475  | HM036244  |
| Avena_barbata                | + | HM849803  | NA        | NA        |
| Avicennia_officinalis        | + | KF848224  | NA        | NA        |
| Barbilophozia_barbata        | + | DQ312477  | AM396187  | AM398313  |
| Barbilophozia_hatcheri       | + | DQ312478  | KC184777  | AM398338  |
| Barbilophozia_lycopodioides  | + | KC297121  | KC184778  | AM398333  |
| Betula_alleghaniensis        | + | KF418936  | NA        | NA        |
| Betula_papyrifera            | + | EU676902  | NA        | NA        |
| Betula_pendula               | + | KM360670  | NA        | NA        |
| Betula_platyphylla           | + | AY263927  | NA        | NA        |
| Betula_pubescens             | + | JN893073  | NA        | NA        |
| Bistorta_vivipara            | + | FM883608  | NA        | NA        |
| Blasia_pusilla               | + | AB476555  | AY507477  | NA        |
| Boscia_foetida               | + | JF265309  | NA        | NA        |
| Botrychium_virginianum       | + | AY138407  | NA        | NA        |
| Bouteloua_gracilis           | + | JX848489  | NA        | NA        |
| Brachypodium_pinnatum        | + | AY632361  | NA        | Z29230    |
| Brassica_napus               | + | NC_016734 | NC_016734 | NC_016734 |
| Briza_media                  | + | KF602072  | NA        | NA        |
| Brodiaea_coronaria           | + | Z69210    | NA        | NA        |
| Bromus_erectus               | + | AJ746286  | NA        | Z29232    |
| Bromus_tectorum              | + | KF712969  | AY744775  | NA        |
| Bucegia_romanica             | + | EU519194  | NA        | AJ250182  |
| Burmanna_capitata            | + | AY149347  | NA        | NA        |
| Cajanus_cajan                | + | EU717273  | NA        | NA        |
| Calamagrostis_arundinacea    | + | HQ600475  | NA        | NA        |
| Callicarpa_americana         | + | KJ773329  | NA        | NA        |
| Calluna_vulgaris             | + | L12601    | NA        | NA        |
| Caltha_palustris             | + | EU053906  | NA        | NA        |
| Calypogeia_fissa             | + | DQ312479  | NA        | NA        |
| Calypogeia_muelleriana       | + | AM392302  | AM396306  | AY608052  |
| Camellia_japonica            | + | AF380035  | NA        | NA        |
| Campanula_punctata           | + | EU643725  | NA        | NA        |
| Caragana_korshinskii         | + | FJ537215  | NA        | NA        |
| Cardamine_pratensis          | + | KM360692  | NA        | NA        |
| Carduus_tenuiflorus          | + | HM849849  | NA        | NA        |
| Carex_hirta                  | - | KJ841178  | NA        | NA        |
| Carya_illinoensis            | + | KP088511  | NA        | NA        |
| Castanea_dentata             | + | KF418892  | NA        | NA        |
| Castanea_mollissima          | + | NC_014677 | NC_014676 | NC_014678 |
| Castanea_sativa              | + | KM360699  | NA        | NA        |
| Castanopsis_fargesii         | + | JF941175  | NA        | NA        |
| Casuarina_equisetifolia      | + | AY263930  | NA        | NA        |
| Cecropia_obtusa              | + | JQ626251  | NA        | NA        |
| Cedrela_odorata              | + | AJ402938  | NA        | NA        |
| Cedrus_atlantica             | + | AF145457  | NA        | EF053196  |
| Cedrus_deodara               | + | NC_014575 | NC_014575 | NC_014575 |
| Cenchrus_ciliaris            | + | FR821344  | NA        | NA        |
| Centaurea_jacea              | + | KF602073  | NA        | NA        |
| Cephalanthera_damasonium     | + | AF074123  | NA        | NA        |
| Cephalanthera_erecta         | + | JF972908  | NA        | NA        |
| Cephalanthera_falcata        | + | JF972909  | NA        | NA        |
| Cephalanthera_longibracteata | + | AB856507  | NA        | NA        |
| Cephalanthera_longifolia     | + | JX051381  | NA        | NA        |
| Cephalanthera_rubra          | + | JX088502  | NA        | NA        |
| Cephalozia_bicuspidata       | + | KF852370  | AM396186  | JF513486  |
| Cephalozia_varians           | + | DQ439689  | AY607953  | AY608074  |
| Ceratopteris_richardii       | - | KM052729  | KM052729  | KM052729  |
| Cercocarpus_ledifolius       | + | U06796    | NA        | NA        |
| Chamaecyparis_obtusa         | + | JQ512525  | NA        | AY188283  |
| Chamerion_angustifolium      | + | KM360765  | NA        | NA        |
| Chimaphila_umbellata         | + | AF419818  | NA        | NA        |
| Cinchona_officinalis         | + | AY538480  | NA        | NA        |
| Cinnamomum_bejolghota        | + | GQ248569  | NA        | NA        |
| Citrullus_colocynthis        | + | HM849900  | NA        | NA        |
| Citrus_maxima                | + | AB505955  | NA        | NA        |
| Clematis_vitalba             | + | KM360724  | NA        | NA        |

|                              |   |           |           |           |
|------------------------------|---|-----------|-----------|-----------|
| Clintonia borealis           | + | AB056856  | NA        | NA        |
| Cneorum tricoccon            | + | FR747837  | NA        | NA        |
| Coffea arabica               | + | NC_008535 | NC_008535 | NC_008535 |
| Comarostaphylis arbutoides   | + | AF419819  | NA        | NA        |
| Commelina benghalensis       | + | L05033    | NA        | NA        |
| Conocephalum conicum         | + | AY688778  | AB020574  | DQ220678  |
| Convallaria majalis          | + | D28334    | NA        | NA        |
| Conyza canadensis            | + | KM360730  | NA        | NA        |
| Corallorhiza trifida         | + | NC_025662 | NC_025662 | NC_025662 |
| Cornus suecica               | + | AF421085  | JF321223  | NA        |
| Corycium carnosum            | + | AY381115  | NA        | NA        |
| Corylus avellana             | + | HM849918  | NA        | NA        |
| Corylus colurna              | + | KF418951  | NA        | NA        |
| Crataegus monogyna           | + | KM360737  | NA        | NA        |
| Cremastra appendiculata      | + | FJ445514  | NA        | NA        |
| Cymbidium ensifolium         | + | AF074141  | NA        | NA        |
| Cymbidium floribundum        | + | KJ597961  | NA        | NA        |
| Cymbidium goeringii          | + | KC704878  | NA        | NA        |
| Cymbidium lancifolium        | + | KJ597953  | NA        | NA        |
| Cymbidium macrorhizon        | + | KF296680  | NA        | NA        |
| Cymbidium sinense            | + | NC_021430 | NC_021430 | NC_021430 |
| Cymbopogon nardus            | + | KJ740992  | NA        | NA        |
| Cynara cardunculus           | + | KM035764  | KM035764  | KM035764  |
| Cynosurus cristatus          | + | HM849932  | NA        | NA        |
| Cynosurus echinatus          | + | HM849933  | NA        | NA        |
| Cypripedium acaule           | + | EF370111  | NA        | NA        |
| Cypripedium arietinum        | + | EF370104  | NA        | NA        |
| Cypripedium calceolus        | + | AB176549  | NA        | NA        |
| Cypripedium californicum     | + | EF370108  | NA        | NA        |
| Cypripedium candidum         | + | EF370103  | NA        | NA        |
| Cypripedium debile           | + | EF370114  | NA        | NA        |
| Cypripedium fasciculatum     | + | EF370112  | NA        | NA        |
| Cypripedium flavum           | + | JN181474  | NA        | NA        |
| Cypripedium formosanum       | + | NC_026772 | NC_026772 | NC_026772 |
| Cypripedium guttatum         | + | EF370113  | NA        | NA        |
| Cypripedium japonicum        | + | KJ625630  | KJ625630  | KJ625630  |
| Cypripedium montanum         | + | EF370102  | NA        | NA        |
| Cypripedium parviflorum      | + | EF370106  | NA        | NA        |
| Cypripedium reginae          | + | EF370105  | NA        | NA        |
| Cypripedium tibeticum        | + | JQ182215  | NA        | NA        |
| Cystopteris protrusa         | - | KP136830  | KP136830  | KP136830  |
| Dacrycarpus dacrydioides     | + | AF249597  | NA        | NA        |
| Dactylis glomerata           | + | JX848494  | NA        | NA        |
| Daucus carota                | + | NC_008325 | NC_008325 | NC_008325 |
| Delonix regia                | + | AY904419  | NA        | NA        |
| Dendrobium catenatum         | + | KF177581  | HM768333  | NA        |
| Dendrobium chrysanthum       | + | KF177586  | NA        | NA        |
| Dendrobium crumenatum        | + | JF713166  | NA        | NA        |
| Dendrobium fimbriatum        | + | KF177603  | NA        | NA        |
| Dendrobium nobile            | + | AB519785  | NA        | NA        |
| Dendroceros crispus          | + | DQ845662  | NA        | KP238702  |
| Dendroceros validus          | + | JX885634  | NA        | NA        |
| Dendrolycopodium dendroideum | + | KJ593352  | NA        | NA        |
| Dichrostachys cinerea        | + | JQ025041  | NA        | NA        |
| Dicksonia squarrosa          | + | KJ569698  | KJ569698  | KJ569698  |
| Dicorynia guianensis         | + | JQ626129  | NA        | NA        |
| Dimocarpus longan            | + | AY724349  | NA        | NA        |
| Dioon edule                  | - | AF531203  | NA        | GQ204075  |
| Dioscorea rotundata          | + | KJ629262  | JF705476  | NA        |
| Diphasiastrum alpinum        | + | AJ133250  | NA        | AM777778  |
| Diplophyllum albicans        | + | AM392309  | AM396190  | AY608060  |
| Diplophyllum obtusifolium    | + | AY507397  | AY507480  | AY507439  |
| Diplopterygium glaucum       | + | NC_024158 | NC_024158 | NC_024158 |
| Dipteris conjugata           | - | KP136829  | KP136829  | KP136829  |
| Dipterocarpus tuberculatus   | + | KM267148  | NA        | NA        |
| Disa bracteata               | + | AY368344  | NA        | NA        |
| Disperis capensis            | + | AY381120  | NA        | NA        |
| Dodonaea viscosa             | + | AM235129  | NA        | NA        |
| Dryas integrifolia           | + | KC482649  | NA        | NA        |
| Dryas octopetala             | + | KF602200  | NA        | JF317523  |
| Dysphania ambrosioides       | + | HM587599  | NA        | NA        |
| Elephantopus scaber          | + | GQ436445  | NA        | NA        |
| Empetrum nigrum              | + | AF421091  | NA        | NA        |
| Enkianthus campanulatus      | + | L12616    | NA        | NA        |
| Enkianthus cernuus           | + | AB726263  | NA        | NA        |
| Enkianthus nudipes           | + | AB726264  | NA        | NA        |
| Enkianthus perulatus         | + | JF941463  | NA        | NA        |

|                            |   |           |           |           |
|----------------------------|---|-----------|-----------|-----------|
| Enkianthus_sikokianus      | + | AB726257  | NA        | NA        |
| Enkianthus_subsessilis     | + | AB726255  | NA        | NA        |
| Eperua_falcata             | + | JQ626198  | NA        | NA        |
| Eperua_grandiflora         | + | JQ625939  | NA        | NA        |
| Ephedra_fragilis           | + | AY755784  | NA        | AY591477  |
| Epidendrum_rhopalosteale   | + | KF679618  | NA        | NA        |
| Epilobium_ciliatum         | + | KF997326  | NA        | NA        |
| Epipactis_albensis         | + | FJ454878  | NA        | NA        |
| Epipactis_atrorubens       | + | JX088503  | NA        | NA        |
| Epipactis_dunensis         | + | JX088504  | NA        | NA        |
| Epipactis_helleborine      | + | Z73707    | NA        | NA        |
| Epipactis_palustris        | + | JX094817  | NA        | NA        |
| Epipactis_purpurata        | + | JX094816  | NA        | NA        |
| Equisetum_arvense          | - | NC_014699 | NC_014699 | NC_014699 |
| Equisetum_fluviatile       | + | AB574684  | NA        | DQ463116  |
| Equisetum_hyemale          | - | NC_020146 | NC_020146 | NC_020146 |
| Erica_carnea               | + | KP737713  | NA        | NA        |
| Erica_ciliaris             | + | KF997417  | NA        | NA        |
| Erica_cinerea              | + | KM360768  | NA        | NA        |
| Erica_vagans               | + | KF997402  | NA        | NA        |
| Eriochilus_cucullatus      | + | AF074166  | NA        | NA        |
| Erythranthe_guttata        | + | KF997284  | NA        | KJ161985  |
| Eucalyptus_camaldulensis   | + | NC_022398 | NC_022398 | NC_022398 |
| Eucalyptus_globulus        | + | NC_008115 | NC_008115 | NC_008115 |
| Eucalyptus_gunnii          | + | KM360776  | NA        | NA        |
| Eucalyptus_marginata       | + | NC_022390 | NC_022390 | NC_022390 |
| Eucalyptus_nitens          | + | NC_022395 | NC_022395 | NC_022395 |
| Excoecaria_agallocha       | + | AY794839  | NA        | NA        |
| Exormotheca_pustulosa      | + | DQ286010  | DQ265754  | DQ220684  |
| Fagopyrum_esculentum       | + | NC_010776 | NC_010776 | NC_010776 |
| Fagopyrum_tataricum        | + | NC_027161 | NC_027161 | NC_027161 |
| Fagus_grandifolia          | + | AY935745  | NA        | NA        |
| Fagus_sylvatica            | + | KF418911  | NA        | NA        |
| Faramea_occidentalis       | + | JQ593668  | NA        | NA        |
| Festuca_idahoensis         | + | KJ756344  | NA        | NA        |
| Festuca_ovina              | + | NC_019649 | NC_019649 | NC_019649 |
| Festuca_pratensis          | + | NC_019650 | NC_019650 | NC_019650 |
| Festuca_rubra              | + | AJ746261  | NA        | NA        |
| Festuca_rupicola           | + | KJ746319  | NA        | NA        |
| Folioceros_fuciformis      | + | AY463050  | NA        | KP238708  |
| Folioceros_glandulosus     | + | JF815573  | NA        | NA        |
| Fossombronina_angulosa     | + | AY507398  | AY507481  | HQ447031  |
| Fragaria_vesca             | + | NC_015206 | NC_015206 | NC_015206 |
| Fraxinus_excelsior         | + | KP088611  | NA        | NA        |
| Galium_album               | + | X81090    | NA        | NA        |
| Galium_aparine             | + | X81091    | NA        | HQ385112  |
| Gaultheria_procombens      | + | HQ590116  | NA        | NA        |
| Gaultheria_shallon         | + | KM360799  | NA        | NA        |
| Genista_cinerea            | + | Z70094    | NA        | NA        |
| Geothallus_tuberosus       | + | U87070    | NA        | NA        |
| Geranium_pratense          | + | KP963381  | KP963305  | NA        |
| Geum_rivale                | + | KM360804  | NA        | NA        |
| Ginkgo_biloba              | + | NC_016986 | NC_016986 | NC_016986 |
| Glechoma_hederacea         | + | Z37391    | NA        | NA        |
| Gleichenia_microphylla     | + | DQ910504  | NA        | JQ911728  |
| Gliricidia_sepium          | + | KF381127  | NA        | NA        |
| Glycine_max                | + | NC_007942 | NC_007942 | NC_007942 |
| Gnetum_gnemon              | + | NC_026301 | NC_026301 | NC_026301 |
| Goodyera_foliosa           | + | HM141074  | NA        | NA        |
| Goodyera_maximowicziana    | + | KF296607  | NA        | NA        |
| Goodyera_oblongifolia      | + | HM141070  | NA        | NA        |
| Goodyera_procera           | + | HM141076  | NA        | NA        |
| Goodyera_pubescens         | + | FJ571329  | NA        | NA        |
| Goodyera_repens            | + | FJ571330  | NA        | NA        |
| Goodyera_schlechtendaliana | + | HM141073  | NA        | NA        |
| Goodyera_velutina          | + | HM141075  | NA        | NA        |
| Guapira_discolor           | + | KJ522686  | NA        | NA        |
| Guapira_fragrans           | + | JX844257  | NA        | NA        |
| Guarea_pterorhachis        | + | JQ592716  | NA        | NA        |
| Gymnadenia_conopsea        | + | KC704906  | NA        | NA        |
| Gynostemma_pentaphyllum    | + | AY968523  | NA        | NA        |
| Handroanthus_ochraceus     | + | JQ590852  | NA        | NA        |
| Haplomitrium_blumei        | + | AY507402  | AY507485  | AY507443  |
| Haplomitrium_chilensis     | + | KC305698  | NA        | NA        |
| Haplomitrium_gibbsiae      | + | KF852350  | AY607947  | AY688793  |
| Haplomitrium_hookeri       | + | U87072    | AY877398  | AJ251064  |
| Hedera_rhombea             | + | AB817831  | NA        | NA        |

|                           |   |           |           |           |
|---------------------------|---|-----------|-----------|-----------|
| Hedyosmum_goudotianum     | + | EU302198  | NA        | NA        |
| Helianthemum_squamatum    | + | FJ225851  | NA        | NA        |
| Helianthus_annuus         | + | NC_007977 | NC_007977 | NC_007977 |
| Helichrysum_stoechas      | + | GU817766  | NA        | NA        |
| Heteropogon_contortus     | + | AM235061  | NA        | NA        |
| Heterotheca_villosa       | + | JX848417  | NA        | NA        |
| Hexalectris_revoluta      | + | AF264168  | FJ457818  | NA        |
| Hieronyma_oblonga         | + | AY663588  | NA        | NA        |
| Holcus_lanatus            | + | KF602083  | NA        | NA        |
| Hopea_odorata             | + | KM267144  | NA        | NA        |
| Hordeum_vulgare           | + | NC_008590 | NC_008590 | NC_008590 |
| Huperzia_appressa         | + | DQ464220  | NA        | NA        |
| Huperzia_lucidula         | + | NC_006861 | NC_006861 | NC_006861 |
| Hyacinthoides_non-scripta | + | KM360826  | NA        | NA        |
| Hymenostegia_ngouniensis  | + | KC685085  | NA        | NA        |
| Hypericum_maculatum       | + | KF602180  | NA        | NA        |
| Hypochaeris_radicata      | + | AY395542  | NA        | NA        |
| Inga_acreana              | + | JQ625968  | NA        | NA        |
| Inga_edulis               | + | FJ173737  | NA        | NA        |
| Intsia_bijuga             | + | KF496786  | NA        | NA        |
| Inula_conyza              | + | JN892414  | NA        | NA        |
| Ionopsis_utricularioides  | + | FJ534225  | NA        | NA        |
| Ipomoea_pes_caprae        | + | KF242490  | KF242490  | KF242490  |
| Isoetes_echinospora       | + | FJ785184  | NA        | NA        |
| Isoetes_flaccida          | - | NC_014675 | NC_014675 | NC_014675 |
| Isoetes_lacustris         | + | AJ010855  | NA        | NA        |
| Isopachys_bicrenatus      | + | KF852384  | KF851946  | KF851475  |
| Jacobaea_vulgaris         | + | NC_015543 | NC_015543 | NC_015543 |
| Japonolirion_osense       | + | JQ068978  | NA        | NA        |
| Jensenia_connivens        | + | AY688782  | AY688829  | AY507450  |
| Juglans_regia             | + | KF418920  | NA        | NA        |
| Juncus_bulbosus           | + | HM850086  | NA        | NA        |
| Kandelia_candel           | + | AF127682  | NA        | NA        |
| Keteleeria_davidiana      | + | NC_011930 | NC_011930 | NC_011930 |
| Knautia_arvensis          | + | KF602109  | NA        | NA        |
| Kobresia_myosuroides      | + | KF602151  | NA        | NA        |
| Kummerowia_striata        | + | KJ773609  | NA        | NA        |
| Larix_decidua             | + | NC_016058 | NC_016058 | NC_016058 |
| Larix_gmelinii            | + | JQ512557  | NA        | EF053200  |
| Larix_kaempferi           | + | JQ512558  | NA        | NA        |
| Lavandula_latifolia       | + | Z37406    | NA        | NA        |
| Leiosporoceros_dussii     | + | AY463052  | NA        | KP238712  |
| Leontodon_hispidus        | + | AY395545  | NA        | NA        |
| Lepidozia_reptans         | + | AM392313  | AM396195  | AY608083  |
| Leymus_mollis             | + | KF712997  | NA        | NA        |
| Ligularia_virgaurea       | + | JF942280  | NA        | NA        |
| Ligustrum_vulgare         | + | DQ673302  | NA        | HQ385090  |
| Limodorum_abortivum       | + | JX051376  | NA        | NA        |
| Linnaea_borealis          | + | KM360854  | KP297623  | GQ983907  |
| Liparis_kumokiri          | + | KC704909  | NA        | NA        |
| Liparis_liliifolia        | + | AF074183  | NA        | NA        |
| Liparis_loeselii          | + | KM360856  | NA        | NA        |
| Listera_cordata           | + | JN965648  | NA        | NA        |
| Listera_ovata             | + | JX051379  | NA        | NA        |
| Litsea_cubeba             | + | AY337734  | NA        | NA        |
| Littorella_uniflora       | + | HM850128  | NA        | NA        |
| Lobaticcardia_lobata      | + | AY507421  | AY507507  | AY507462  |
| Lobelia_dortmanna         | + | DQ356162  | NA        | NA        |
| Lolium_multiflorum        | + | NC_019651 | NC_019651 | NC_019651 |
| Lolium_perenne            | + | NC_009950 | NC_009950 | NC_009950 |
| Lophozia_ventricosa       | + | AY699994  | KF851831  | JF513477  |
| Lophozonia_cunninghamii   | + | AY605490  | NA        | NA        |
| Lophozonia_menziesii      | + | AY605494  | NA        | NA        |
| Lotus_brunneri            | + | KM372996  | NA        | NA        |
| Lotus_corniculatus        | + | KM360864  | NA        | NA        |
| Lotus_jacobaeus           | + | KM373014  | NA        | NA        |
| Lotus_japonicus           | + | NC_002694 | NC_002694 | NC_002694 |
| Luehea_seemannii          | + | GQ981791  | NA        | NA        |
| Lupinus_latifolius        | + | Z70059    | NA        | NA        |
| Luronium_natans           | + | U80680    | NA        | NA        |
| Lycium_barbarum           | + | KP088673  | NA        | NA        |
| Lycopodiella_inundata     | + | AB574631  | NA        | NA        |
| Lycopodiella_lateralis    | + | AJ133262  | NA        | NA        |
| Lycopodium_annotinum      | + | AJ133247  | NA        | AM777801  |
| Lycopodium_clavatum       | + | Y07936    | NA        | DQ463115  |
| Lycopodium_fastigiatum    | + | AJ133252  | NA        | AM777805  |
| Lycopodium_volubile       | + | AJ133253  | NA        | AM777808  |

|                           |   |           |           |           |
|---------------------------|---|-----------|-----------|-----------|
| Lygodium_japonicum        | - | NC_022136 | NC_022136 | NC_022136 |
| Maianthemum_bifolium      | + | EU850093  | NA        | NA        |
| Maianthemum_racemosum     | + | AY149376  | NA        | NA        |
| Malus_hupehensis          | + | JQ391361  | NA        | NA        |
| Malus_micromalus          | + | GU363816  | NA        | NA        |
| Malus_sieboldii           | + | JQ391372  | NA        | NA        |
| Mangifera_indica          | + | GQ436547  | NA        | NA        |
| Mankyua_chejuensis        | - | NC_017006 | NC_017006 | NC_017006 |
| Mannia_androgyna          | + | AM920276  | DQ265756  | DQ220686  |
| Mannia_fragrans           | + | DQ286013  | DQ265757  | DQ220687  |
| Marchantia_paleacea       | + | DQ286015  | DQ265759  | DQ220689  |
| Marsilea_crenata          | + | NC_022137 | NC_022137 | NC_022137 |
| Medicago_murex            | + | KC700638  | NA        | NA        |
| Medicago_polymorpha       | + | KJ773677  | NA        | NA        |
| Medicago_truncatula       | + | JX512022  | JX512022  | JX512022  |
| Megaceros_flagellaris     | + | GQ845371  | AY877400  | KP238713  |
| Megaceros_leptohymenius   | + | HM056150  | NA        | KP238714  |
| Megaceros_pellucidus      | + | GQ504733  | NA        | NA        |
| Megathyrus_maximus        | + | AM849390  | NA        | NA        |
| Melilotus_albus           | + | DQ006095  | NA        | NA        |
| Melinis_repens            | + | EF125136  | NA        | Z29259    |
| Mercurialis_perennis      | + | KM360880  | NA        | NA        |
| Metzgeria_conjugata       | + | AY507411  | AY507495  | AY507453  |
| Metzgeria_decipiens       | + | AB535634  | NA        | AM398259  |
| Metzgeria_furcata         | + | AB535635  | AM396271  | DQ463119  |
| Metzgeria_pubescens       | + | AB535632  | AM396272  | DQ268982  |
| Metzgeria_temperata       | + | AB535636  | NA        | AB535657  |
| Miscanthus_sinensis       | + | EF125118  | NA        | NA        |
| Monoclea_gottschei        | + | DQ286016  | DQ265760  | AY507455  |
| Monosolenium_tenerum      | + | DQ286017  | NA        | DQ220691  |
| Montinia_caryophyllacea   | + | L11194    | NA        | HQ385127  |
| Moringa_drouhardii        | + | AF405249  | NA        | NA        |
| Moringa_hildebrandtii     | + | JX091930  | NA        | NA        |
| Moringa_oleifera          | + | JX091931  | NA        | NA        |
| Musa_acuminata            | + | HF677508  | HF677508  | HF677508  |
| Myriopteris_lindheimeri   | - | NC_014592 | NC_014592 | NC_014592 |
| Nardia_compressa          | + | DQ026586  | NA        | NA        |
| Nardia_geoscyphus         | + | KF943554  | KF942493  | KF943501  |
| Nardia_scalaris           | + | KF943606  | AY607971  | JF513481  |
| Neohodgsonia_mirabilis    | + | DQ286018  | AY507499  | DQ220692  |
| Neoorthocaulis_floerkei   | + | KC297118  | KC184803  | KF851449  |
| Neottia_nidus-avis        | + | AY368364  | NA        | NA        |
| Nephrolepis_hirsutula     | + | AB575229  | NA        | AY459163  |
| Nervilia_nipponica        | + | KF296711  | NA        | NA        |
| Neuwiedia_veratrifolia    | + | AF074200  | NA        | NA        |
| Noccaea_caerulescens      | + | JN891339  | NA        | NA        |
| Nothoceros_aenigmaticus   | - | NC_020259 | NC_020259 | NC_020259 |
| Nothoceros_giganteus      | + | AY463046  | NA        | KP238719  |
| Nothoceros_vincentianus   | + | AY463045  | NA        | KP238724  |
| Notothylas_javanica       | + | DQ845664  | NA        | KP238729  |
| Notothylas_orbicularis    | + | AY463055  | NA        | DQ463117  |
| Nyholmiella_obtusifolia   | + | NC_026979 | NC_026979 | NC_026979 |
| Nymphaea_alba             | + | NC_006050 | NC_006050 | NC_006050 |
| Odontoschisma_denudatum   | + | DQ645977  | AY607975  | KJ620750  |
| Olea_europaea             | + | NC_013707 | NC_013707 | NC_013707 |
| Oloptum_miliaceum         | + | FN870403  | NA        | NA        |
| Ononis_repens             | + | KF602196  | NA        | NA        |
| Ophioglossum_californicum | - | NC_020147 | NC_020147 | NC_020147 |
| Ophioglossum_costatum     | + | AB626643  | NA        | NA        |
| Ophioglossum_vulgatum     | + | AB574681  | JQ684697  | NA        |
| Ophrys_fuciflora          | + | GQ248658  | NA        | NA        |
| Ophrys_insectifera        | + | HE858481  | NA        | NA        |
| Orchis_anthropophora      | + | KF997307  | NA        | NA        |
| Orchis_mascula            | + | KM360905  | NA        | NA        |
| Orchis_militaris          | + | KF997273  | NA        | NA        |
| Orchis_purpurea           | + | KF997502  | NA        | NA        |
| Orchis_simia              | + | KF997259  | NA        | NA        |
| Origanum_vulgare          | + | JX880022  | JX880022  | JX880022  |
| Orixa_japonica            | + | HE588085  | NA        | NA        |
| Orthilia_secunda          | + | AF419838  | NA        | NA        |
| Orthocaulis_attenuatus    | + | GU373417  | NA        | AM398282  |
| Oryza_sativa              | + | NC_001320 | NC_001320 | NC_001320 |
| Osmunda_regalis           | + | EF588705  | NA        | EF588768  |
| Osmundastrum_cinnamomeum  | - | NC_024157 | NC_024157 | NC_024157 |
| Ostrya_carpiniifolia      | + | KF418956  | NA        | NA        |
| Oxalis_acetosella         | + | FJ670181  | NA        | NA        |
| Oxalis_stricta            | + | KC481639  | NA        | NA        |

|                                  |   |           |           |           |
|----------------------------------|---|-----------|-----------|-----------|
| Oxymitra_incrassata              | + | EU519195  | NA        | EU519197  |
| Pachyschistochila_splachnophylla | + | KF184409  | NA        | KF184437  |
| Palhinhaea_cernua                | + | KJ773661  | NA        | NA        |
| Pallavicinia_xiphoides           | + | AY734692  | AY734709  | AY734700  |
| Panax_ginseng                    | + | NC_006290 | NC_006290 | NC_006290 |
| Panax_japonicus                  | + | GQ436711  | NA        | NA        |
| Panicum_virgatum                 | + | NC_015990 | NC_015990 | NC_015990 |
| Paphiopedilum_armeniacum         | + | NC_026779 | NC_026779 | NC_026779 |
| Paphiopedilum_dianthum           | + | JQ182210  | NA        | NA        |
| Paraphymatoceros_coriaceus       | + | AY463042  | NA        | NA        |
| Paris_incompleta                 | + | JF942774  | NA        | NA        |
| Paris_quadrifolia                | + | KM360917  | NA        | NA        |
| Paspalum_distichum               | + | FN870399  | NA        | NA        |
| Pellia_endiviifolia              | + | NC_019628 | NC_019628 | NC_019628 |
| Perilla_frutescens               | + | FJ513160  | NA        | NA        |
| Phaeoceros_carolinianus          | + | DQ646009  | NA        | GQ428118  |
| Phaeoceros_dendroceroides        | + | KF482291  | NA        | KP238737  |
| Phaeoceros_laevius               | + | DQ845673  | NA        | KP238743  |
| Phaeoceros_pearsonii             | + | AY860203  | NA        | KP238734  |
| Phaeomegaceros_coriaceus         | + | JX872450  | NA        | KP238750  |
| Phaeomegaceros_hirticalyx        | + | KC958508  | NA        | KP238751  |
| Phaius_tancarvilleae             | + | KF852752  | NA        | NA        |
| Phalaris_arundinacea             | + | AJ784827  | NA        | NA        |
| Phaseolus_vulgaris               | + | NC_009259 | NC_009259 | NC_009259 |
| Phellodendron_amurense           | + | FN599455  | NA        | NA        |
| Phlegmariusus_phlegmaria         | + | AB574635  | NA        | NA        |
| Phoenix_dactylifera              | + | NC_013991 | NC_013991 | NC_013991 |
| Phragmites_australis             | + | NC_022958 | NC_022958 | NC_022958 |
| Phyllanthus_calycinus            | + | AY663603  | NA        | EU002353  |
| Phyllohallia_nivicola            | + | AY507418  | AY507504  | AY507459  |
| Physcomitrella_patens            | + | NC_005087 | NC_005087 | NC_005087 |
| Phytolacca_americana             | + | FJ860398  | NA        | HQ843413  |
| Picea_abies                      | + | NC_021456 | NC_021456 | NC_021456 |
| Picea_crassifolia                | + | EF440576  | NA        | NA        |
| Picea_glauca                     | + | JX508439  | NA        | NA        |
| Picea_jezoensis                  | + | JQ512567  | NA        | NA        |
| Picea_mariana                    | + | JX508447  | NA        | NA        |
| Picea_rubens                     | + | EF440600  | NA        | NA        |
| Picea_sitchensis                 | + | NC_011152 | NC_011152 | NC_011152 |
| Picea_smithiana                  | + | AF145458  | NA        | AY188226  |
| Pilea_pumila                     | + | AF206811  | NA        | NA        |
| Pilosella_officinarum            | + | KF602082  | NA        | NA        |
| Pinus_albicaulis                 | + | FJ899566  | FJ899566  | FJ899566  |
| Pinus_banksiana                  | + | FJ899571  | FJ899571  | FJ899571  |
| Pinus_canariensis                | + | FJ899572  | FJ899572  | FJ899572  |
| Pinus_caribaea                   | + | JN854222  | JN854222  | JN854222  |
| Pinus_cembra                     | + | FJ899574  | NA        | FJ899574  |
| Pinus_contorta                   | + | NC_011153 | NC_011153 | NC_011153 |
| Pinus_densiflora                 | + | JN854210  | JN854210  | JN854210  |
| Pinus_edulis                     | + | JN854203  | JN854203  | JN854203  |
| Pinus_elliottii                  | + | JN854202  | JN854202  | JN854202  |
| Pinus_halepensis                 | + | JN854197  | JN854197  | JN854197  |
| Pinus_jeffreyi                   | + | JN854193  | JN854193  | JN854193  |
| Pinus_kesiya                     | + | JN854191  | JN854191  | JN854191  |
| Pinus_koraiensis                 | + | NC_004677 | NC_004677 | NC_004677 |
| Pinus_lambertiana                | + | NC_011156 | NC_011156 | NC_011156 |
| Pinus_longaeva                   | + | AF456383  | NA        | NA        |
| Pinus_massoniana                 | + | NC_021439 | NC_021439 | NC_021439 |
| Pinus_montezumae                 | + | JN854183  | JN854183  | JN854183  |
| Pinus_mugo                       | + | JN854181  | JN854181  | JN854181  |
| Pinus_muricata                   | + | JN854180  | JN854180  | JN854180  |
| Pinus_nigra                      | + | JN854179  | JN854179  | JN854179  |
| Pinus_parviflora                 | + | FJ899581  | FJ899581  | FJ899581  |
| Pinus_patula                     | + | JN854175  | JN854175  | JN854175  |
| Pinus_pinaster                   | + | FJ899583  | FJ899583  | FJ899583  |
| Pinus_pinea                      | + | JN854173  | JN854173  | JN854173  |
| Pinus_ponderosa                  | + | FJ899555  | FJ899555  | FJ899555  |
| Pinus_pumila                     | + | JN854168  | JN854168  | JN854168  |
| Pinus_radiata                    | + | JN854165  | JN854165  | JN854165  |
| Pinus_roxburghii                 | + | JN854162  | JN854162  | JN854162  |
| Pinus_sabiniana                  | + | JN854161  | JN854161  | JN854161  |
| Pinus_strobus                    | + | NC_026302 | NC_026302 | NC_026302 |
| Pinus_sylvestris                 | + | JN854158  | JN854158  | JN854158  |
| Pinus_tabuliformis               | + | AY555714  | NA        | NA        |
| Pinus_taeda                      | + | NC_021440 | NC_021440 | NA        |
| Pinus_thunbergii                 | + | NC_001631 | NC_001631 | NC_001631 |
| Pinus_virginiana                 | + | JN854155  | JN854155  | JN854155  |

|                                   |   |           |           |           |
|-----------------------------------|---|-----------|-----------|-----------|
| <i>Pinus wallichiana</i>          | + | JN854154  | JN854154  | JN854154  |
| <i>Piper nigrum</i>               | + | AY298847  | NA        | DQ972915  |
| <i>Pisonia aculeata</i>           | + | KJ594427  | NA        | NA        |
| <i>Pisonia albida</i>             | + | JX844264  | NA        | NA        |
| <i>Pisonia grandis</i>            | + | JX844258  | NA        | NA        |
| <i>Pisonia sandwicensis</i>       | + | JX844266  | NA        | NA        |
| <i>Pisonia sechellarum</i>        | + | JX844267  | NA        | NA        |
| <i>Pisonia taina</i>              | + | JX844260  | NA        | NA        |
| <i>Pisum sativum</i>              | + | NC_014057 | NC_014057 | NC_014057 |
| <i>Plagiogyria glauca</i>         | - | KP136831  | KP136831  | KP136831  |
| <i>Plantago afra</i>              | + | AJ389602  | NA        | NA        |
| <i>Plantago asiatica</i>          | + | GQ436317  | NA        | NA        |
| <i>Plantago lanceolata</i>        | + | HM850265  | NA        | NA        |
| <i>Plantago major</i>             | + | HM850266  | NA        | NA        |
| <i>Platanthera azorica</i>        | + | HM850267  | NA        | NA        |
| <i>Platanthera chlorantha</i>     | + | JN891411  | NA        | NA        |
| <i>Platanthera micrantha</i>      | + | HM850268  | NA        | NA        |
| <i>Pleurozia gigantea</i>         | + | KF852349  | AM396268  | KF851436  |
| <i>Pleurozia purpurea</i>         | + | AY877391  | AY877401  | AY608100  |
| <i>Poa pratensis</i>              | + | JX848506  | NA        | NA        |
| <i>Podocarpus oleifolius</i>      | + | HM593664  | NA        | NA        |
| <i>Podococcus barteri</i>         | + | NC_027276 | NC_027276 | NC_027276 |
| <i>Podomitrium phyllanthus</i>    | + | AY507419  | AY507505  | AY507460  |
| <i>Polygala amara</i>             | + | Z70175    | NA        | NA        |
| <i>Polygala calcarea</i>          | + | AM234194  | NA        | NA        |
| <i>Polygala comosa</i>            | + | AM234211  | NA        | NA        |
| <i>Polygala myrtifolia</i>        | + | AJ829699  | NA        | NA        |
| <i>Polygala rupestris</i>         | + | AM234220  | NA        | NA        |
| <i>Polygala serpyllifolia</i>     | + | EU644685  | NA        | NA        |
| <i>Polygala vulgaris</i>          | + | AM234193  | NA        | NA        |
| <i>Polygonum cuspidatum</i>       | + | AB019030  | NA        | NA        |
| <i>Polypodium glycyrrhiza</i>     | - | KP136832  | KP136832  | KP136832  |
| <i>Polystichum acrostichoides</i> | + | AF537235  | NA        | NA        |
| <i>Populus alba</i>               | + | NC_008235 | NC_008235 | NC_008235 |
| <i>Populus balsamifera</i>        | + | NC_024735 | NC_024735 | NC_024735 |
| <i>Populus davidiana</i>          | + | KC485208  | NA        | NA        |
| <i>Populus deltoides</i>          | + | AJ418829  | X78204    | NA        |
| <i>Populus euphratica</i>         | + | NC_024747 | NC_024747 | NC_024747 |
| <i>Populus nigra</i>              | + | AJ418828  | NA        | NA        |
| <i>Populus simonii</i>            | + | KF940819  | NA        | NA        |
| <i>Populus tremula</i>            | + | NC_027425 | NC_027425 | NC_027425 |
| <i>Populus trichocarpa</i>        | + | NC_009143 | NC_009143 | NC_009143 |
| <i>Potentilla erecta</i>          | + | HM850285  | NA        | NA        |
| <i>Preissia quadrata</i>          | + | AY312935  | AY312916  | AY608102  |
| <i>Prumnopitys ferruginea</i>     | + | AF249656  | NA        | NA        |
| <i>Prumnopitys montana</i>        | + | KF714220  | NA        | NA        |
| <i>Prumnopitys taxifolia</i>      | + | HM593621  | NA        | AY188259  |
| <i>Prunella vulgaris</i>          | + | AY395556  | NA        | NA        |
| <i>Prunus africana</i>            | + | AM235108  | NA        | NA        |
| <i>Prunus persica</i>             | + | NC_014697 | NC_014697 | NC_014697 |
| <i>Pseudorchis albida</i>         | + | KF997412  | NA        | NA        |
| <i>Pseudotsuga menziesii</i>      | + | JN854170  | JN854170  | JN854170  |
| <i>Psilotum nudum</i>             | + | NC_003386 | NC_003386 | NC_003386 |
| <i>Pteridium aquilinum</i>        | - | NC_014348 | NC_014348 | NC_014348 |
| <i>Pterostylis nutans</i>         | + | AF074224  | NA        | NA        |
| <i>Pterygodium catholicum</i>     | + | AY368346  | NA        | NA        |
| <i>Ptisana purpurascens</i>       | + | EU439089  | NA        | EU439132  |
| <i>Puccinellia distans</i>        | + | HE577877  | NA        | NA        |
| <i>Puccinellia maritima</i>       | + | JN892490  | NA        | NA        |
| <i>Pulmonaria obscura</i>         | + | EU599876  | NA        | NA        |
| <i>Purdiaea nutans</i>            | + | AY082698  | NA        | NA        |
| <i>Pyrola minor</i>               | + | KM360950  | NA        | NA        |
| <i>Pyrola rotundifolia</i>        | + | JN892808  | NA        | NA        |
| <i>Pyrorchis nigricans</i>        | + | AF074187  | NA        | NA        |
| <i>Pyrus pyrifolia</i>            | + | NC_015996 | NC_015996 | NC_015996 |
| <i>Quercus agrifolia</i>          | + | KF683137  | NA        | NA        |
| <i>Quercus alba</i>               | + | KF418899  | NA        | NA        |
| <i>Quercus cerris</i>             | + | FN675722  | NA        | NA        |
| <i>Quercus douglasii</i>          | + | KF683145  | NA        | NA        |
| <i>Quercus fabri</i>              | + | KP088808  | NA        | NA        |
| <i>Quercus ilex</i>               | + | FN675717  | NA        | NA        |
| <i>Quercus incana</i>             | + | KJ773803  | NA        | NA        |
| <i>Quercus petraea</i>            | + | KF683156  | NA        | NA        |
| <i>Quercus phellos</i>            | + | KJ773810  | NA        | NA        |
| <i>Quercus pubescens</i>          | + | FN675720  | NA        | NA        |
| <i>Quercus robur</i>              | + | KP088814  | NA        | NA        |
| <i>Quercus rubra</i>              | + | NC_020152 | NC_020152 | NC_020152 |



|                                   |   |           |           |           |
|-----------------------------------|---|-----------|-----------|-----------|
| <i>Quercus salicina</i>           | + | AB060570  | NA        | NA        |
| <i>Quercus suber</i>              | + | FN675726  | NA        | NA        |
| <i>Quercus variabilis</i>         | + | AB060574  | NA        | NA        |
| <i>Quercus wislizeni</i>          | + | KF683168  | NA        | NA        |
| <i>Ranunculus montanus</i>        | + | KF602172  | NA        | NA        |
| <i>Ranunculus repens</i>          | + | HM850298  | NA        | NA        |
| <i>Retama sphaerocarpa</i>        | + | Z70119    | NA        | NA        |
| <i>Rhizophora apiculata</i>       | + | AF127685  | NA        | NA        |
| <i>Rhododendron decorum</i>       | + | HQ706897  | NA        | NA        |
| <i>Rhododendron ferrugineum</i>   | + | KF602219  | NA        | NA        |
| <i>Rhododendron fortunei</i>      | + | HQ706905  | NA        | NA        |
| <i>Rhododendron groenlandicum</i> | + | AF419831  | NA        | NA        |
| <i>Rhododendron racemosum</i>     | + | JF944013  | NA        | NA        |
| <i>Rhododendron tomentosum</i>    | + | AF421101  | NA        | NA        |
| <i>Rhomboda cristata</i>          | + | HM141068  | NA        | NA        |
| <i>Riccardia latifrons</i>        | + | KC305702  | NA        | NA        |
| <i>Riccardia multifida</i>        | + | DQ268980  | NA        | DQ268992  |
| <i>Riccardia palmata</i>          | + | KC305704  | NA        | DQ986149  |
| <i>Riccia huebeneriana</i>        | + | AY507422  | AY507508  | AY507463  |
| <i>Riella helicophylla</i>        | + | DQ268981  | NA        | NA        |
| <i>Robinia pseudoacacia</i>       | + | NC_026684 | NC_026684 | NC_026684 |
| <i>Rosa multiflora</i>            | + | KP088837  | NA        | NA        |
| <i>Rosmarinus officinalis</i>     | + | NC_027259 | NC_027259 | NC_027259 |
| <i>Rubus parvifolius</i>          | + | GU363802  | NA        | NA        |
| <i>Rubus saxatilis</i>            | + | JN891152  | NA        | NA        |
| <i>Ruta chalepensis</i>           | + | HM850326  | NA        | NA        |
| <i>Saccobasis polita</i>          | + | KF852308  | KF851862  | KF851413  |
| <i>Saccogyna viticulosa</i>       | + | KF852385  | AM396175  | KP671947  |
| <i>Salicornia europaea</i>        | + | NC_027225 | NC_027225 | NC_027225 |
| <i>Salix alba</i>                 | + | AB012780  | NA        | NA        |
| <i>Salix arctica</i>              | + | KM002834  | NA        | NA        |
| <i>Salix herbacea</i>             | + | KF602181  | NA        | NA        |
| <i>Salix polaris</i>              | + | FJ788569  | NA        | NA        |
| <i>Salix reinii</i>               | + | AB012792  | NA        | NA        |
| <i>Salix reticulata</i>           | + | AJ235793  | NA        | NA        |
| <i>Salix tetrasperma</i>          | + | AB012798  | NA        | NA        |
| <i>Salvadora persica</i>          | + | X69755    | NA        | NA        |
| <i>Sanionia uncinata</i>          | + | NC_025668 | NC_025668 | NC_025668 |
| <i>Santiria trimeria</i>          | + | GU246043  | NA        | NA        |
| <i>Saussurea involucrata</i>      | + | GQ436481  | NA        | NA        |
| <i>Sauteria alpina</i>            | + | DQ286025  | DQ265768  | HQ225532  |
| <i>Saxifraga oppositifolia</i>    | + | JN965986  | NA        | NA        |
| <i>Scapania calcicola</i>         | + | KC184746  | KC184814  | NA        |
| <i>Scapania cuspiduligera</i>     | + | KC184748  | KC184816  | NA        |
| <i>Scapania irrigua</i>           | + | KC305708  | NA        | NA        |
| <i>Scapania umbrosa</i>           | + | KC184757  | KC184825  | NA        |
| <i>Schistochilopsis incisa</i>    | + | AM392308  | AM396188  | AM398234  |
| <i>Schizocodon soldanelloides</i> | + | AF421105  | NA        | NA        |
| <i>Selaginella kraussiana</i>     | + | AJ010845  | NA        | NA        |
| <i>Selaginella moellendorffii</i> | - | NC_013086 | NC_013086 | NC_013086 |
| <i>Selaginella selaginoides</i>   | + | AF419048  | NA        | NA        |
| <i>Selaginella uncinata</i>       | - | AB197035  | AB197035  | AB197035  |
| <i>Senegalia senegal</i>          | + | JF265258  | NA        | NA        |
| <i>Sequoiadendron giganteum</i>   | + | AY056580  | NA        | AY188267  |
| <i>Serapias cordigera</i>         | + | HM850348  | NA        | NA        |
| <i>Sesleria caerulea</i>          | + | EF125156  | NA        | X84142    |
| <i>Setaria pumila</i>             | + | KF163544  | NA        | NA        |
| <i>Shorea guiso</i>               | + | AB925523  | NA        | NA        |
| <i>Shorea obtusa</i>              | + | AB925320  | NA        | NA        |
| <i>Solanum tuberosum</i>          | + | NC_008096 | NC_008096 | NC_008096 |
| <i>Solidago canadensis</i>        | + | KM360988  | NA        | NA        |
| <i>Solidago gigantea</i>          | + | HM850369  | NA        | NA        |
| <i>Solidago missouriensis</i>     | + | JX848425  | NA        | NA        |
| <i>Solidago rugosa</i>            | + | EU677029  | NA        | NA        |
| <i>Solidago virgaurea</i>         | + | KF602089  | NA        | NA        |
| <i>Sonchus tenerrimus</i>         | + | HM850374  | NA        | NA        |
| <i>Sonneratia alba</i>            | + | KF848248  | NA        | NA        |
| <i>Sorbus aucuparia</i>           | + | HQ590284  | NA        | NA        |
| <i>Sorghum bicolor</i>            | + | NC_008602 | NC_008602 | NC_008602 |
| <i>Southbya nigrella</i>          | + | KF852355  | KF851914  | KF851446  |
| <i>Sphaerocarpos texanus</i>      | + | AY507425  | AY507511  | NA        |
| <i>Sphagnum palustre</i>          | + | AF231887  | AY312920  | JX241483  |
| <i>Spiranthes sinensis</i>        | + | KC704924  | NA        | NA        |
| <i>Subularia aquatica</i>         | + | KM361000  | NA        | NA        |
| <i>Swietenia macrophylla</i>      | + | U39080    | NA        | EU002368  |
| <i>Symphyogyna hymenophyllum</i>  | + | AY507426  | AY507512  | AY507467  |
| <i>Syntrichia ruralis</i>         | + | NC_012052 | NC_012052 | NC_012052 |

|                            |   |           |           |           |
|----------------------------|---|-----------|-----------|-----------|
| Tacca_plantaginea          | + | JQ733814  | NA        | NA        |
| Tainia_latifolia           | + | KF852754  | NA        | NA        |
| Takakia_lepidozioides      | + | AB299142  | AY312921  | AB299142  |
| Tanacetum_vulgare          | + | KM361004  | NA        | NA        |
| Taraxacum_officinale       | + | AY395562  | NA        | NA        |
| Taxus_baccata              | + | AF456388  | NA        | X84145    |
| Tectona_grandis            | + | NC_020098 | NC_020098 | NC_020098 |
| Tetragastris_panamensis    | + | JQ626012  | NA        | NA        |
| Tetraphis_pellucida        | + | NC_024291 | NC_024291 | NC_024291 |
| Thalictrum_minus           | + | EU053923  | NA        | KC289069  |
| Thismia_rodwayi            | + | AY939892  | NA        | NA        |
| Thlaspi_arvense            | + | KM361012  | NA        | NA        |
| Thymus_praecox             | + | KM361013  | NA        | NA        |
| Thymus_pulegioides         | + | KJ746270  | NA        | NA        |
| Tilia_americana            | + | HQ590302  | NA        | NA        |
| Tilia_cordata              | + | KP088884  | NA        | NA        |
| Tipularia_discolor         | + | AF074234  | NA        | NA        |
| Tmesipteris_elongata       | + | KJ569699  | KJ569699  | KJ569699  |
| Tmesipteris_tannensis      | + | EF469945  | NA        | NA        |
| Torilis_arvensis           | + | AM234827  | NA        | NA        |
| Torilis_japonica           | + | KM361016  | NA        | NA        |
| Toxicoscordion_venenosum   | + | KM242960  | NA        | NA        |
| Trachycarpus_fortunei      | + | AJ404752  | NA        | NA        |
| Trachystemon_orientalis    | + | KF158122  | NA        | NA        |
| Tragopogon_pratensis       | + | AY395563  | NA        | NA        |
| Treubia_lacunosa           | + | AY507428  | NA        | AY507468  |
| Treubia_lacunosoides       | - | AY507429  | AY507515  | AY507469  |
| Tricoryne_elatior          | + | JX903207  | NA        | NA        |
| Trientalis_europaea        | + | U96655    | NA        | NA        |
| Trifolium_pratense         | + | AY395564  | KJ788290  | KJ788290  |
| Trifolium_repens           | + | KM361020  | NA        | NA        |
| Trifolium_subterraneum     | + | NC_011828 | NC_011828 | NC_011828 |
| Trillium_grandiflorum      | + | D28164    | NA        | NA        |
| Triplophyllum_vogelii      | + | KF887210  | NA        | NA        |
| Triraphis_mollis           | + | JN681713  | NA        | NA        |
| Trisetum_flavescens        | + | AJ746276  | NA        | NA        |
| Trisyngyne_balansae        | + | L13344    | NA        | NA        |
| Trisyngyne_codonandra      | + | L13347    | NA        | NA        |
| Triticum_aestivum          | + | NC_002762 | NC_002762 | NC_002762 |
| Tritomaria_exsectiformis   | + | KC184766  | KC184833  | NA        |
| Tritomaria_quinqueidentata | + | AY700003  | KF851855  | KF851406  |
| Trizeuxis_falcata          | + | FJ534151  | NA        | NA        |
| Tsuga_canadensis           | + | JQ512625  | NA        | AY188220  |
| Tsuga_mertensiana          | + | AF145463  | NA        | AY188215  |
| Typha_angustifolia         | + | GQ436381  | NA        | X84147    |
| Typha_latifolia            | + | NC_013823 | NC_013823 | NC_013823 |
| Ulmus_americana            | + | AF500337  | NA        | NA        |
| Vaccinium_myrtillus        | + | KM361028  | NA        | NA        |
| Vaccinium_oxycoccos        | + | JN891672  | NA        | NA        |
| Vaccinium_poasanum         | + | JQ594910  | NA        | AY331865  |
| Vaccinium_uliginosum       | + | AF421107  | NA        | NA        |
| Vaccinium_vitis_idaea      | + | JN966057  | NA        | NA        |
| Vachellia_erioloba         | + | JX572192  | NA        | NA        |
| Veratrum_oxysepalum        | + | JN417478  | NA        | NA        |
| Verbena_officinalis        | + | Z37473    | NA        | NA        |
| Verdoornia_succulenta      | + | AY507430  | AY507516  | AY507470  |
| Veronica_chamaedrys        | + | KJ746275  | NA        | NA        |
| Vicia_faba                 | + | KF042344  | KF042344  | KF042344  |
| Vicia_hirsuta              | + | HM850459  | NA        | NA        |
| Vicia_sativa               | + | NC_027155 | NC_027155 | NC_027155 |
| Vicia_tetrasperma          | + | HM850463  | NA        | NA        |
| Vigna_unguiculata          | + | NC_018051 | NC_018051 | NC_018051 |
| Vincetoxicum_rossicum      | + | KF539854  | KF539854  | KF539854  |
| Vitis_vinifera             | + | NC_007957 | NC_007957 | NC_007957 |
| Wiesnerella_denudata       | + | DQ286027  | NA        | DQ220701  |
| Woolisia_pungens           | + | U80425    | NA        | NA        |
| Wulfschlaegelia_aphylla    | + | AY368436  | NA        | NA        |
| Zamia_pumila               | - | AY056557  | NA        | AY188209  |
| Zea_mays                   | + | NC_001666 | NC_001666 | NC_001666 |
| Zeuxine_agyokuana          | + | HM141071  | NA        | NA        |
| Zeuxine_strateumatica      | + | KJ773994  | NA        | NA        |
| Zingiber_officinale        | + | KM213122  | KM213122  | KM213122  |
| Zoysia_japonica            | + | AM849385  | NA        | NA        |

**Table S4 | Fossil calibration points used for divergence time estimates of land plants.**

| <b>Crown group</b> | <b>Min divergence age</b> | <b>Max divergence age</b> | <b>Reference</b>     |
|--------------------|---------------------------|---------------------------|----------------------|
| Tracheophyta       | 416.0                     | 454.0                     | (Cooper et al. 2012) |
| Spermatophyta      | 306.2                     | 366.8                     | (Clarke et al. 2011) |
| Marchantiophyta    | 452.0                     | 509.0                     | (Cooper et al. 2012) |
| Euphyllophyta      | 388.2                     | 454.0                     | (Cooper et al. 2012) |
| Angiosperms        | 124.0                     | 248                       | (Cooper et al. 2012) |

Clarke, J. T., R. C. Warnock, and P. C. Donoghue. 2011. Establishing a time-scale for plant evolution. *New Phytol* 192:266-301.

Cooper, E. D., M. J. Henwood, and E. A. Brown. 2012. Are the liverworts really that old? Cretaceous origins and Cenozoic diversifications in Lepidoziaceae reflect a recurrent theme in liverwort evolution. *Biol J Linn Soc* 107:425-441.
